# Supplementary material
Source: PubMed Central journal article supplement (PMC2668196)

## Supporting Information

**Table 1.** Assay performance as measured by plate QC statistics and positive control behavior for all 13 caspase-3/7 assays.

| Cell Type (Passage)              | S/B            | CV          | Z'               | Control       | Concentration    | EC50 ( $\mu$ M) | R2               | Hill Coefficient |
|----------------------------------|----------------|-------------|------------------|---------------|------------------|-----------------|------------------|------------------|
| Mesangial cell (P18)             | 16.4 $\pm$ 0.6 | 21 $\pm$ 24 | 0.84 $\pm$ 0.03  | Staurosporine | 10 (20; 1:3)     | 0.2 $\pm$ 0.04  | 0.96 $\pm$ 0.02  | 1.6 $\pm$ 0.5    |
| NIH 3T3 (P7)                     | 8.6 $\pm$ 0.7  | 23 $\pm$ 26 | 0.81 $\pm$ 0.03  | Staurosporine | 3 (46; 1:3)      | 0.4 $\pm$ 0.2   | 0.89 $\pm$ 0.02  | 1.3 $\pm$ 0.3    |
| SK-N-SH (P6)                     | 11.9 $\pm$ 0.5 | 25 $\pm$ 23 | 0.87 $\pm$ 0.02  | Staurosporine | 10 (20; 1:3)     | 0.7 $\pm$ 0.2   | 1 $\pm$ 0.001    | 1.1 $\pm$ 0.1    |
| N2a (P9)                         | 5.5 $\pm$ 0.2  | 12 $\pm$ 7  | 0.86 $\pm$ 0.05  | Staurosporine | 10 (20; 1:3)     | 0.9 $\pm$ 0.2   | 1 $\pm$ 0.001    | 1.1 $\pm$ 0.1    |
| BJ (P8)                          | 9.9 $\pm$ 0.3  | 16 $\pm$ 13 | 0.87 $\pm$ 0.02  | Staurosporine | 10 (20; 1:3)     | 1.2 $\pm$ 0.4   | 0.99 $\pm$ 0.01  | 1.1 $\pm$ 0.2    |
| SH-SY5Y (P13)                    | 7.9 $\pm$ 0.8  | 20 $\pm$ 14 | 0.80 $\pm$ 0.04  | Staurosporine | 10 (20; 1:3)     | 1.8 $\pm$ 0.5   | 0.99 $\pm$ 0.003 | 1.2 $\pm$ 0.1    |
| MRC-5 (P10)                      | 9.4 $\pm$ 0.7  | 18 $\pm$ 12 | 0.82 $\pm$ 0.05  | Staurosporine | 10 (20; 1:3)     | 2.8 $\pm$ 0.3   | 0.99 $\pm$ 0.004 | 2.4 $\pm$ 0.5    |
| Rat kidney proximal tubule (N/A) | 2.0 $\pm$ 0.1  | 19 $\pm$ 4  | -0.04 $\pm$ 0.15 | Staurosporine | 10 (20; 1:3)     | 11.4 $\pm$ 1.3  | 0.91 $\pm$ 0.03  | 1.8 $\pm$ 0.6    |
| Jurkat (P10)                     | 7.2 $\pm$ 0.5  | 26 $\pm$ 27 | 0.86 $\pm$ 0.03  | Tamoxifen     | 100 (100; 1:1.5) | 54 $\pm$ 10     | 0.91 $\pm$ 0.03  | 3.5 $\pm$ 0.6    |
| HUV-EC-C (P9)                    | 8.6 $\pm$ 0.7  | 28 $\pm$ 8  | 0.52 $\pm$ 0.11  | Tamoxifen     | 100 (100; 1:1.5) | 66 $\pm$ 11     | 0.95 $\pm$ 0.03  | 2.8 $\pm$ 0.5    |
| H-4-II-E (P11)                   | 14.1 $\pm$ 0.6 | 32 $\pm$ 42 | 0.46 $\pm$ 0.26  | Tamoxifen     | 100 (100; 1:1.5) | 68 $\pm$ 15     | 0.96 $\pm$ 0.04  | 3.8 $\pm$ 1.1    |
| HEK 293 (P19)                    | 8.7 $\pm$ 1.0  | 19 $\pm$ 25 | 0.46 $\pm$ 0.15  | Tamoxifen     | 100 (100; 1:1.5) | 76 $\pm$ 10     | 0.94 $\pm$ 0.03  | 3.0 $\pm$ 0.8    |
| HepG2 (P15)                      | 16.9 $\pm$ 1.1 | 26 $\pm$ 36 | 0.81 $\pm$ 0.05  | Tamoxifen     | 100 (100; 1:1.5) | 79 $\pm$ 10     | 0.94 $\pm$ 0.01  | 3.2 $\pm$ 0.7    |

**Table 2.** MeSH pharmacological action terms for 541 compounds in the NIEHS collection.

| PubChem SID | Name                             | Pharmacological Action Terms                                                                                                                                                                                                                                                                                                                                                                                                                                                                                                                                                                            |
|-------------|----------------------------------|---------------------------------------------------------------------------------------------------------------------------------------------------------------------------------------------------------------------------------------------------------------------------------------------------------------------------------------------------------------------------------------------------------------------------------------------------------------------------------------------------------------------------------------------------------------------------------------------------------|
| 7851619     | 3'-Azido-3'-deoxythymidine (AZT) | Anti-HIV Agents; Antimetabolites; Antimicrobials and chemotherapeutics; Enzymes and inhibitors; HIV-PROTEASE-INHIBITORS; PEPTIDE-HYDROLASE-INHIBITORS; Reverse Transcriptase Inhibitors; REVERSE-TRANSCRIPTASE-INHIBITORS; THYMIDINE-KINASE-INHIBITORS; VIRUCIDES;                                                                                                                                                                                                                                                                                                                                      |
| 7854266     | 3TC (lamavudine)                 | Anti-HIV Agents; Antimicrobials and chemotherapeutics; Enzymes and inhibitors; Reverse Transcriptase Inhibitors; REVERSE-TRANSCRIPTASE-INHIBITORS; VIRUCIDES;                                                                                                                                                                                                                                                                                                                                                                                                                                           |
| 7851739     | Carbaryl                         | ANTICHOLINESTERASES; Cholinesterase Inhibitors; Drugs acting on the nervous system; Insecticides; INSECTICIDES; Pesticides and plant hormones;                                                                                                                                                                                                                                                                                                                                                                                                                                                          |
| 11076304    | d-Camphor                        | ANALEPTICS; ANALGESICS; Anesthetics and drugs relieving fever, inflammation and pain; Anti-Infective Agents, Local; ANTIPIRETICS; Drugs acting on the respiratory system;                                                                                                                                                                                                                                                                                                                                                                                                                               |
| 7852247     | Isoniazid                        | Anesthetics and drugs relieving fever, inflammation and pain; Antimicrobials and chemotherapeutics; ANTIPIRETICS; Antitubercular Agents; TUBERCULOSTATICS;                                                                                                                                                                                                                                                                                                                                                                                                                                              |
| 7851905     | 1,2-Dibromo-3-chloropropane      | Antinematodal Agents; Insecticides;                                                                                                                                                                                                                                                                                                                                                                                                                                                                                                                                                                     |
| 11076629    | Resveratrol                      | ANTIARTERIOSCLEROTICS; Anticarcinogenic Agents; Anti-Inflammatory Agents, Non-Steroidal; Antimutagenic Agents; Antineoplastic Agents, Phytogenic; Antioxidants; Drugs acting on the blood and cardiovascular system; Drugs acting on the gastrointestinal system; Enzyme Inhibitors; HEPATOTROPICS; Platelet Aggregation Inhibitors;                                                                                                                                                                                                                                                                    |
| 7852436     | Nitrofurazone                    | Anesthetics and drugs relieving fever, inflammation and pain; Anti-Infective Agents, Local; Anti-Infective Agents, Urinary; ANTIPIRETICS; Trypanocidal Agents;                                                                                                                                                                                                                                                                                                                                                                                                                                          |
| 7854030     | 2',3'-Dideoxyinosine (ddI)       | Activity terms, miscellaneous; Anesthetics, Local; Anti-Allergic Agents; Anti-Bacterial Agents; ANTIBIOTICS; Antiemetics; ANTIEMETICS; ANTIHISTAMINES-H1; Anti-HIV Agents; Antimetabolites; Antimicrobials and chemotherapeutics; Antiparkinson Agents; Antipruritics; Antitussive Agents; Convulsants; Drugs acting on the gastrointestinal system; Enzyme Inhibitors; Enzymes and inhibitors; GABA Modulators; Histamine H1 Antagonists; HIV-PROTEASE-INHIBITORS; Hypnotics and Sedatives; PEPTIDE-HYDROLASE-INHIBITORS; Psychotropic agents; Reverse Transcriptase Inhibitors; SEDATIVES; VIRUCIDES; |
| 7854823     | 2-Hydroxy-4-methoxybenzophenone  | Drugs acting on the skin; RADIOPROTECTIVES; Sunscreening Agents;                                                                                                                                                                                                                                                                                                                                                                                                                                                                                                                                        |
| 7854852     | Dimethyl phthalate               | Fixatives; Insect Repellents;                                                                                                                                                                                                                                                                                                                                                                                                                                                                                                                                                                           |
| 7852422     | Nicotine                         | Central Nervous System Stimulants; Drugs acting on the nervous system; Ganglionic Stimulants; GANGLION-STIMULANTS; Nicotinic Agonists; PARASYMPATHOMIMETICS;                                                                                                                                                                                                                                                                                                                                                                                                                                            |
| 7852707     | Pyrazinamide                     | Anesthetics and drugs relieving fever, inflammation and pain; Antimicrobials and chemotherapeutics; ANTIPIRETICS; Antitubercular Agents; TUBERCULOSTATICS;                                                                                                                                                                                                                                                                                                                                                                                                                                              |
| 7852337     | Methyl methanesulfonate          | Antineoplastic Agents, Alkylating; Mutagens;                                                                                                                                                                                                                                                                                                                                                                                                                                                                                                                                                            |
| 11076655    | Sulfamethoxazole                 | Anesthetics and drugs relieving fever, inflammation and pain;                                                                                                                                                                                                                                                                                                                                                                                                                                                                                                                                           |

|          |                                     |                                                                                                                                                                                                                                                                                                                                                                                                                                                                                                                                                                                                                                                                                                                                                                                                                                                                                                                                                                                                                                                                                                                                                                                                                                                                                                                                                                                                                                                                                                                                                                                                                                                                                                                                                                                                                                                                                    |
|----------|-------------------------------------|------------------------------------------------------------------------------------------------------------------------------------------------------------------------------------------------------------------------------------------------------------------------------------------------------------------------------------------------------------------------------------------------------------------------------------------------------------------------------------------------------------------------------------------------------------------------------------------------------------------------------------------------------------------------------------------------------------------------------------------------------------------------------------------------------------------------------------------------------------------------------------------------------------------------------------------------------------------------------------------------------------------------------------------------------------------------------------------------------------------------------------------------------------------------------------------------------------------------------------------------------------------------------------------------------------------------------------------------------------------------------------------------------------------------------------------------------------------------------------------------------------------------------------------------------------------------------------------------------------------------------------------------------------------------------------------------------------------------------------------------------------------------------------------------------------------------------------------------------------------------------------|
|          |                                     | Anti-Infective Agents; ANTIPYRETICS;                                                                                                                                                                                                                                                                                                                                                                                                                                                                                                                                                                                                                                                                                                                                                                                                                                                                                                                                                                                                                                                                                                                                                                                                                                                                                                                                                                                                                                                                                                                                                                                                                                                                                                                                                                                                                                               |
| 7851724  | Caffeine                            | Activity terms, miscellaneous; ANALEPTICS; Analgesics, Non-Narcotic; Anticonvulsants; ANTICONVULSANTS; Antimutagenic Agents; Central Nervous System Stimulants; DIURETICS; Drugs acting on the nervous system; Drugs acting on the respiratory system; Phosphodiesterase Inhibitors; PSYCHOSTIMULANTS; PSYCHOTONICS; Psychotropic agents;                                                                                                                                                                                                                                                                                                                                                                                                                                                                                                                                                                                                                                                                                                                                                                                                                                                                                                                                                                                                                                                                                                                                                                                                                                                                                                                                                                                                                                                                                                                                          |
| 11076403 | Indole-3-carbinol                   | Anticarcinogenic Agents;                                                                                                                                                                                                                                                                                                                                                                                                                                                                                                                                                                                                                                                                                                                                                                                                                                                                                                                                                                                                                                                                                                                                                                                                                                                                                                                                                                                                                                                                                                                                                                                                                                                                                                                                                                                                                                                           |
| 7852144  | Gemfibrozil                         | ANTIARTERIOSCLEROTICS; Antilipemic Agents; Drugs acting on the blood and cardiovascular system;                                                                                                                                                                                                                                                                                                                                                                                                                                                                                                                                                                                                                                                                                                                                                                                                                                                                                                                                                                                                                                                                                                                                                                                                                                                                                                                                                                                                                                                                                                                                                                                                                                                                                                                                                                                    |
| 11076678 | Tetrahydroaminoacridine Monohydrate | Activity terms, miscellaneous; ANTIDOTES; Cholinesterase Inhibitors; Drugs acting on the nervous system; NEUROMUSC.BLOCKERS; Nootropic Agents; Parasympathomimetics;                                                                                                                                                                                                                                                                                                                                                                                                                                                                                                                                                                                                                                                                                                                                                                                                                                                                                                                                                                                                                                                                                                                                                                                                                                                                                                                                                                                                                                                                                                                                                                                                                                                                                                               |
| 7854751  | 2',3'-Dideoxycytidine (ddC)         | Anticancer drugs and carcinogens; Anti-HIV Agents; Antimetabolites; Antimetabolites, Antineoplastic; Antimicrobials and chemotherapeutics; Antiviral Agents; CYTOSTATICS; Enzymes and inhibitors; HIV-PROTEASE-INHIBITORS; Immunosuppressive Agents; PEPTIDE-HYDROLASE-INHIBITORS; Reverse Transcriptase Inhibitors; VIRUCIDES;                                                                                                                                                                                                                                                                                                                                                                                                                                                                                                                                                                                                                                                                                                                                                                                                                                                                                                                                                                                                                                                                                                                                                                                                                                                                                                                                                                                                                                                                                                                                                    |
| 11076252 | Carbendazim                         | Activity terms, miscellaneous; Adrenergic alpha-Antagonists; Adrenergic Uptake Inhibitors; ANALGESICS; Analgesics, Non-Narcotic; Anesthetics and drugs relieving fever, inflammation and pain; Anthelmintics; ANTHELMINTICS; ANTIARRHYTHMICS; Anticancer drugs and carcinogens; Anticoagulants; ANTIDEPRESSANTS; Antidepressive Agents; Antidepressive Agents, Tricyclic; ANTIDIABETICS; ANTIEMETICS; Antifungal Agents; ANTIHISTAMINES-H1; ANTIHISTAMINES-H2; Antihypertensive Agents; Anti-Infective Agents; Anti-Inflammatory Agents, Non-Steroidal; Antimalarials; Antimanic Agents; Antimicrobials and chemotherapeutics; Antinematodal Agents; Antiparkinson Agents; Antipruritics; ANTIPYRETICS; ANTISEROTONINS; Antithyroid Agents; Biocompatible Materials; Buffers; CALCIUM-ANTAGONISTS; Calcium Channel Blockers; Cardiovascular Agents; Cathartics; Chelating Agents; CHELATORS; Coloring Agents; CYCLOOXYGENASE-1-INHIBITORS; CYCLOOXYGENASE-2-INHIBITORS; Cyclooxygenase Inhibitors; CYCLOOXYGENASE-INHIBITORS; DIAGNOSTICS; Diuretics; Dopamine Agonists; DOPAMINERGICS; Drugs acting on the blood and cardiovascular system; Drugs acting on the gastrointestinal system; Drugs acting on the nervous system; Drugs acting on the skin; Enzyme Inhibitors; Enzymes and inhibitors; Estradiol Antagonists; Estrogen Antagonists; ESTROGEN-ANTAGONISTS; Expectorants; Fertility Agents, Female; Fixatives; Folic Acid Antagonists; Food Additives; FUNGICIDES; Fungicides, Industrial; Gastrointestinal Agents; Gout Suppressants; Histamine Agonists; Histamine H1 Antagonists; Hormones and antagonists; HYPOTENSIVES; IMMUNOSTIMULANTS; IMMUNOSUPPRESSIVES; Indicators and Reagents; Keratolytic Agents; KERATOLYTICS; Lipotropic Agents; Mutagens; Neuromuscular Depolarizing Agents; Nootropic Agents; PARASYMPATHOMIMETICS; PENETRATION-ENHANCERS; Progestins; |

|          |                                        |                                                                                                                                                                                                                                                                                                                                                                                                                                                                                                                                                                                                                                                                                                                                                                                                                                                                                                                                                                                                                                                                                                                                                                                                                                                                                                                                                                                                                                                                                                                                                                                                                                                                                                                                                                                                                                                                                                                                                                                                                                                                                                                                                                                                                                                                  |
|----------|----------------------------------------|------------------------------------------------------------------------------------------------------------------------------------------------------------------------------------------------------------------------------------------------------------------------------------------------------------------------------------------------------------------------------------------------------------------------------------------------------------------------------------------------------------------------------------------------------------------------------------------------------------------------------------------------------------------------------------------------------------------------------------------------------------------------------------------------------------------------------------------------------------------------------------------------------------------------------------------------------------------------------------------------------------------------------------------------------------------------------------------------------------------------------------------------------------------------------------------------------------------------------------------------------------------------------------------------------------------------------------------------------------------------------------------------------------------------------------------------------------------------------------------------------------------------------------------------------------------------------------------------------------------------------------------------------------------------------------------------------------------------------------------------------------------------------------------------------------------------------------------------------------------------------------------------------------------------------------------------------------------------------------------------------------------------------------------------------------------------------------------------------------------------------------------------------------------------------------------------------------------------------------------------------------------|
|          |                                        | <p>PROGESTOGENS; PROSTAGLANDIN-ANTAGONISTS; PROTOZOACIDES; PSYCHOSEDATIVES; PSYCHOSTIMULANTS; Psychotropic agents; Radiation-Protective Agents; Radiopharmaceuticals; Selective Estrogen Receptor Modulators; Serotonin Agonists; SYMPATHOLYTICS-ALPHA; THROMBOXANE-ANTAGONISTS; Tocolytic Agents; TRANQUILIZERS; Vasodilator Agents; Vitamins and antagonists; VITAMINS;</p>                                                                                                                                                                                                                                                                                                                                                                                                                                                                                                                                                                                                                                                                                                                                                                                                                                                                                                                                                                                                                                                                                                                                                                                                                                                                                                                                                                                                                                                                                                                                                                                                                                                                                                                                                                                                                                                                                    |
| 7853336  | Diethylamine                           | <p>Activity terms, miscellaneous; Adrenergic alpha-Antagonists; Adrenergic Uptake Inhibitors; ANALGESICS; Analgesics, Non-Narcotic; Anesthetics and drugs relieving fever, inflammation and pain; Anthelmintics; ANTHELMINTICS; ANTIARRHYTHMICS; Anticancer drugs and carcinogens; Anticoagulants; ANTIDEPRESSANTS; Antidepressive Agents; Antidepressive Agents, Tricyclic; ANTIDIABETICS; ANTIEMETICS; Antifungal Agents; ANTIHISTAMINES-H1; ANTIHISTAMINES-H2; Antihypertensive Agents; Anti-Infective Agents; Anti-Inflammatory Agents, Non-Steroidal; Antimalarials; Antimanic Agents; Antimicrobials and chemotherapeutics; Antinematodal Agents; Antiparkinson Agents; Antipruritics; ANTIPYRETICS; ANTISEROTONINS; Antithyroid Agents; Biocompatible Materials; Buffers; CALCIUM-ANTAGONISTS; Calcium Channel Blockers; Cardiovascular Agents; Cathartics; Chelating Agents; CHELATORS; Coloring Agents; CYCLOOXYGENASE-1-INHIBITORS; CYCLOOXYGENASE-2-INHIBITORS; Cyclooxygenase Inhibitors; CYCLOOXYGENASE-INHIBITORS; DIAGNOSTICS; Diuretics; Dopamine Agonists; DOPAMINERGICS; Drugs acting on the blood and cardiovascular system; Drugs acting on the gastrointestinal system; Drugs acting on the nervous system; Drugs acting on the skin; Enzyme Inhibitors; Enzymes and inhibitors; Estradiol Antagonists; Estrogen Antagonists; ESTROGEN-ANTAGONISTS; Expectorants; Fertility Agents, Female; Fixatives; Folic Acid Antagonists; Food Additives; FUNGICIDES; Fungicides, Industrial; Gastrointestinal Agents; Gout Suppressants; Histamine Agonists; Histamine H1 Antagonists; Hormones and antagonists; HYPOTENSIVES; IMMUNOSTIMULANTS; IMMUNOSUPPRESSIVES; Indicators and Reagents; Keratolytic Agents; KERATOLYTICS; Lipotropic Agents; Mutagens; Neuromuscular Depolarizing Agents; Nootropic Agents; PARASYMPATHOMIMETICS; PENETRATION-ENHANCERS; Progestins; PROGESTOGENS; PROSTAGLANDIN-ANTAGONISTS; PROTOZOACIDES; PSYCHOSEDATIVES; PSYCHOSTIMULANTS; Psychotropic agents; Radiation-Protective Agents; Radiopharmaceuticals; Selective Estrogen Receptor Modulators; Serotonin Agonists; SYMPATHOLYTICS-ALPHA; THROMBOXANE-ANTAGONISTS; Tocolytic Agents; TRANQUILIZERS; Vasodilator Agents; Vitamins and antagonists; VITAMINS;</p> |
| 11076004 | 2,6-Toluenediamine                     | Carcinogens; Mutagens;                                                                                                                                                                                                                                                                                                                                                                                                                                                                                                                                                                                                                                                                                                                                                                                                                                                                                                                                                                                                                                                                                                                                                                                                                                                                                                                                                                                                                                                                                                                                                                                                                                                                                                                                                                                                                                                                                                                                                                                                                                                                                                                                                                                                                                           |
| 7851934  | 2,4-Dichlorophenoxyacetic acid (2,4-D) | Herbicides; HERBICIDES; Pesticides and plant hormones;                                                                                                                                                                                                                                                                                                                                                                                                                                                                                                                                                                                                                                                                                                                                                                                                                                                                                                                                                                                                                                                                                                                                                                                                                                                                                                                                                                                                                                                                                                                                                                                                                                                                                                                                                                                                                                                                                                                                                                                                                                                                                                                                                                                                           |
| 11076648 | Sodium xylenesulfonate                 | Anticoagulants; Anti-Inflammatory Agents, Non-Steroidal; Antimicrobials and chemotherapeutics; Drugs acting on the blood and cardiovascular system; Enzyme Inhibitors;                                                                                                                                                                                                                                                                                                                                                                                                                                                                                                                                                                                                                                                                                                                                                                                                                                                                                                                                                                                                                                                                                                                                                                                                                                                                                                                                                                                                                                                                                                                                                                                                                                                                                                                                                                                                                                                                                                                                                                                                                                                                                           |

|          |                                                            |                                                                                                                                                                                                                                                             |
|----------|------------------------------------------------------------|-------------------------------------------------------------------------------------------------------------------------------------------------------------------------------------------------------------------------------------------------------------|
|          |                                                            | HEPARINOIDS; VIRUCIDES;                                                                                                                                                                                                                                     |
| 7851894  | 2,4-Diaminotoluene                                         | Carcinogens; Mutagens;                                                                                                                                                                                                                                      |
| 7851863  | Dapsone                                                    | Anesthetics and drugs relieving fever, inflammation and pain; Anti-Infective Agents; Anti-Inflammatory Agents, Non-Steroidal; ANTILEPROTICS; Antimalarials; Antimicrobials and chemotherapeutics; ANTIPYRETICS; Folic Acid Antagonists; Leprostatic Agents; |
| 11076416 | Isopropyl methanesulfonate                                 | Alkylating Agents;                                                                                                                                                                                                                                          |
| 7854583  | Ribavirin                                                  | Anti-HIV Agents; Antimetabolites; Antimicrobials and chemotherapeutics; Antiviral Agents; Enzymes and inhibitors; HIV-PROTEASE-INHIBITORS; PEPTIDE-HYDROLASE-INHIBITORS; Reverse Transcriptase Inhibitors; REVERSE-TRANSCRIPTASE-INHIBITORS; VIRUCIDES;     |
| 11076445 | Melatonin                                                  | Adjuvants, Immunologic; Anticonvulsants; Antioxidants; Free Radical Scavengers;                                                                                                                                                                             |
| 7851768  | 3-Chloro-4-(dichloromethyl)-5-hydroxy-2(5H)-furanone, (MX) | Carcinogens; Mutagens;                                                                                                                                                                                                                                      |
| 11076352 | dl-Camphor                                                 | ANALEPTICS; ANALGESICS; Anesthetics and drugs relieving fever, inflammation and pain; Anti-Infective Agents, Local; ANTIPYRETICS; Drugs acting on the respiratory system;                                                                                   |
| 7853387  | Ethylene glycol monophenyl ether                           | Anesthetics; ANTICONVULSANTS; Anti-Infective Agents, Local; Drugs acting on the nervous system; PSYCHOSEDATIVES; Psychotropic agents; TRANQUILIZERS;                                                                                                        |
| 11076196 | Ammonium nitrate                                           | Explosive Agents; Fertilizers;                                                                                                                                                                                                                              |
| 11076460 | Methyl isothiocyanate                                      | Disinfectants; Herbicides;                                                                                                                                                                                                                                  |
| 7851519  | Acrylamide                                                 | ANALGESICS; Anesthetics and drugs relieving fever, inflammation and pain;                                                                                                                                                                                   |
| 7852433  | Sodium nitrite                                             | Food Preservatives; Indicators and Reagents;                                                                                                                                                                                                                |
| 7852158  | Glycidol                                                   | Carcinogens;                                                                                                                                                                                                                                                |
| 11076617 | Propylene glycol                                           | Solvents; Vehicles;                                                                                                                                                                                                                                         |
| 11076207 | Benzene                                                    | Insecticides; INSECTICIDES; Pesticides and plant hormones;                                                                                                                                                                                                  |
| 11076301 | D4T (2',3'-Didehydro-3'-deoxythymidine)                    | Anti-HIV Agents; Antimetabolites; Antimicrobials and chemotherapeutics; Antiviral Agents; Enzymes and inhibitors; HIV-PROTEASE-INHIBITORS; PEPTIDE-HYDROLASE-INHIBITORS; Reverse Transcriptase Inhibitors; REVERSE-TRANSCRIPTASE-INHIBITORS; VIRUCIDES;     |
| 7851686  | Boric acid                                                 | Insecticides;                                                                                                                                                                                                                                               |
| 11076450 | Methoxyacetic acid                                         | Immunosuppressive Agents;                                                                                                                                                                                                                                   |
| 7851957  | Diethylstilbestrol [DES]                                   | Antineoplastic Agents, Hormonal; Carcinogens; ESTROGENS; Estrogens, Non-Steroidal; Hormones and antagonists;                                                                                                                                                |
| 11076649 | Sodium zomepirac                                           | ANALGESICS; Anesthetics and drugs relieving fever, inflammation and pain; ANTIHISTAMINES-H2; Anti-Inflammatory Agents, Non-Steroidal; Drugs acting on the gastrointestinal system;                                                                          |
| 11076132 | 4-Hydroxyphenyl retinamide                                 | Anticancer drugs and carcinogens; Anticarcinogenic Agents; Antineoplastic Agents; CYTOSTATICS; VITAMINS; Vitamins and antagonists;                                                                                                                          |
| 11076202 | Azithromycin                                               | Anti-Bacterial Agents; ANTIBIOTICS; Antimicrobials and chemotherapeutics;                                                                                                                                                                                   |
| 11076170 | Acetochlor                                                 | Herbicides;                                                                                                                                                                                                                                                 |
| 11076612 | Potassium dichromate                                       | Caustics; Coloring Agents;                                                                                                                                                                                                                                  |
| 7852732  | all-trans-Retinyl acetate                                  | Adjuvants, Immunologic; ANGIOGENESIS-INHIBITORS; Anticancer drugs and carcinogens; Anticarcinogenic Agents;                                                                                                                                                 |

|          |                                       |                                                                                                                                                                                                                                                                                                  |
|----------|---------------------------------------|--------------------------------------------------------------------------------------------------------------------------------------------------------------------------------------------------------------------------------------------------------------------------------------------------|
|          |                                       | Antioxidants; Vitamins; VITAMINS; Vitamins and antagonists;                                                                                                                                                                                                                                      |
| 7852276  | Lovastatin                            | ANTIARTERIOSCLEROTICS; Anticholesteremic Agents; Antineoplastic Agents; Drugs acting on the blood and cardiovascular system; HMG-COA-REDUCTASE-INHIBITORS; Hydroxymethylglutaryl-CoA Reductase Inhibitors;                                                                                       |
| 7852736  | Rifampicin                            | Antibiotics, Antitubercular; ANTIBIOTICS; ANTILEPROTICS; Antimicrobials and chemotherapeutics; COLLAGENASE-INHIBITORS; Enzyme Inhibitors; Enzymes and inhibitors; Leprostatic Agents; MATRIX-METALLOPROTEINASE-INHIBITORS; PEPTIDE-HYDROLASE-INHIBITORS; TUBERCULOSTATICS;                       |
| 7852296  | Melphalan                             | Anticancer drugs and carcinogens; Antineoplastic Agents, Alkylating; CYTOSTATICS; Myeloablative Agonists;                                                                                                                                                                                        |
| 7853657  | Alachlor                              | Herbicides;                                                                                                                                                                                                                                                                                      |
| 11076275 | cis-Dichlorodiamine platinum          | Anticancer drugs and carcinogens; Antineoplastic Agents; Cross-Linking Reagents; CYTOSTATICS; Enzymes and inhibitors; PROTEIN-KINASE-C-INHIBITORS; Radiation-Sensitizing Agents; TELOMERASE-INHIBITORS;                                                                                          |
| 11076451 | Methoxychlor [95%]                    | Insecticides; INSECTICIDES; Pesticides and plant hormones;                                                                                                                                                                                                                                       |
| 11076631 | Rifabutin                             | Anti-Bacterial Agents; Antibiotics, Antitubercular; ANTIBIOTICS; Antimicrobials and chemotherapeutics;                                                                                                                                                                                           |
| 11076046 | 2-Ethylhexyl-p-dimethyl-aminobenzoate | Drugs acting on the skin; RADIOPROTECTIVES; Sunscreening Agents;                                                                                                                                                                                                                                 |
| 7852677  | Prednisone                            | Anti-Inflammatory Agents; Antineoplastic Agents, Hormonal; CORTICOSTEROIDS; Glucocorticoids; Hormones and antagonists;                                                                                                                                                                           |
| 7852750  | Scopolamine hydrobromide trihydrate   | Adjuvants, Anesthesia; Drugs acting on the nervous system; Muscarinic Antagonists; Mydriatics; MYDRIATICS; PARASYMPATHOLYTICS; Psychotropic agents; SEDATIVES;                                                                                                                                   |
| 11076186 | alpha-Cyclodextrin                    | Hormones and antagonists; PROSTAGLANDINS;                                                                                                                                                                                                                                                        |
| 7853238  | Di-n-butyl phthalate                  | Plasticizers;                                                                                                                                                                                                                                                                                    |
| 11076152 | 5-Bromo-2'-deoxyuridine (BRDU)        | Anticancer drugs and carcinogens; Antimetabolites; Antimetabolites, Antineoplastic; Antimicrobials and chemotherapeutics; Antiviral Agents; CYTOSTATICS; Radiation-Sensitizing Agents; VIRUCIDES;                                                                                                |
| 11076288 | Curcumin                              | ANTIHISTAMINES-H2; Anti-Inflammatory Agents, Non-Steroidal; Antineoplastic Agents; Coloring Agents; Drugs acting on the gastrointestinal system; Enzyme Inhibitors; Enzymes and inhibitors; PHOSPHOLIPASE-INHIBITORS;                                                                            |
| 7852793  | Tamoxifen, citrate salt               | ANGIOGENESIS-INHIBITORS; Anticancer drugs and carcinogens; Antineoplastic Agents, Hormonal; Bone Density Conservation Agents; Enzymes and inhibitors; Estrogen Antagonists; ESTROGEN-ANTAGONISTS; Hormones and antagonists; PROTEIN-KINASE-C-INHIBITORS; Selective Estrogen Receptor Modulators; |
| 7851850  | beta-Cyclodextrin                     | Carcinogens; Food Additives;                                                                                                                                                                                                                                                                     |
| 11076522 | Nitazoxanide                          | ANTHELMINTICS; Antimicrobials and chemotherapeutics; Antiparasitic Agents;                                                                                                                                                                                                                       |
| 11076466 | Methylene blue trihydrate             | Activity terms, miscellaneous; Anesthetics and drugs relieving fever, inflammation and pain; ANTIDOTES; Anti-Infective Agents, Urinary; ANTIPYRETICS; Enzyme Inhibitors; Enzymes and inhibitors; GUANYLATE-CYCLASE-INHIBITORS;                                                                   |
| 11076176 | Adriamycin, hydrochloride             | ANTIBIOTICS; Antibiotics, Antineoplastic; Anticancer drugs and carcinogens; Antimicrobials and chemotherapeutics;                                                                                                                                                                                |

|          |                              |                                                                                                                                                                                                                                                                                                                                                                                                                                                                                                        |
|----------|------------------------------|--------------------------------------------------------------------------------------------------------------------------------------------------------------------------------------------------------------------------------------------------------------------------------------------------------------------------------------------------------------------------------------------------------------------------------------------------------------------------------------------------------|
|          |                              | CYTOSTATICS; DNA-INTERCALATORS; P-GLYCOPROTEIN-INHIBITORS; TOPOISOMERASE-II-INHIBITORS; TOPOISOMERASE-INHIBITORS;                                                                                                                                                                                                                                                                                                                                                                                      |
| 11076586 | Pentamidine isethionate      | Antifungal Agents; Antimicrobials and chemotherapeutics; Antiprotozoal Agents; PROTOZOACIDES; Trypanocidal Agents;                                                                                                                                                                                                                                                                                                                                                                                     |
| 7851697  | Butyl benzyl phthalate       | Teratogens;                                                                                                                                                                                                                                                                                                                                                                                                                                                                                            |
| 11076507 | Nelfinavir mesylate          | Antimicrobials and chemotherapeutics; Enzymes and inhibitors; HIV Protease Inhibitors; HIV-PROTEASE-INHIBITORS; PEPTIDE-HYDROLASE-INHIBITORS; VIRUCIDES;                                                                                                                                                                                                                                                                                                                                               |
| 11076513 | Nevirapine                   | Anti-HIV Agents; Antimicrobials and chemotherapeutics; Enzymes and inhibitors; Reverse Transcriptase Inhibitors; REVERSE-TRANSCRIPTASE-INHIBITORS; VIRUCIDES;                                                                                                                                                                                                                                                                                                                                          |
| 7851604  | Atrazine                     | Adrenergic Agents; Adrenergic beta-Agonists; Adrenergic Uptake Inhibitors; ANORECTICS; ANTI-ASTHMATICS; BRONCHODILATORS; Central Nervous System Stimulants; Dopamine Agents; Dopamine Uptake Inhibitors; Drugs acting on the nervous system; Drugs acting on the respiratory system; Herbicides; HERBICIDES; Pesticides and plant hormones; PSYCHOSTIMULANTS; PSYCHOTONICS; Psychotropic agents; SYMPATHOMIMETICS-ALPHA; Sympathomimetics; SYMPATHOMIMETICS-BETA;                                      |
| 7853376  | Benzophenone                 | Photosensitizing Agents;                                                                                                                                                                                                                                                                                                                                                                                                                                                                               |
| 11076669 | tert-Butylhydroquinone       | Antioxidants; Enzyme Inhibitors;                                                                                                                                                                                                                                                                                                                                                                                                                                                                       |
| 11075967 | 2',3'-Dideoxyadenosine (ddA) | Antimetabolites; Antiviral Agents;                                                                                                                                                                                                                                                                                                                                                                                                                                                                     |
| 7854544  | Primaclone                   | Anticonvulsants; ANTICONVULSANTS; Drugs acting on the nervous system;                                                                                                                                                                                                                                                                                                                                                                                                                                  |
| 7852074  | Ethoxyquin                   | Activity terms, miscellaneous; ANTIOXIDANTS; HERBICIDES; Pesticides and plant hormones;                                                                                                                                                                                                                                                                                                                                                                                                                |
| 7852405  | Naphthalene                  | ACARICIDES; Carcinogens; Explosive Agents; Pesticides and plant hormones; Tocolytic Agents; Vasodilator Agents;                                                                                                                                                                                                                                                                                                                                                                                        |
| 7851798  | Chloroform                   | Anesthetics and drugs relieving fever, inflammation and pain; GEN-ANESTHETICS; Solvents;                                                                                                                                                                                                                                                                                                                                                                                                               |
| 7851531  | Aldicarb                     | ACARICIDES; ANTHELMINTICS; Antimicrobials and chemotherapeutics; Cholinesterase Inhibitors; Insecticides; INSECTICIDES; Pesticides and plant hormones;                                                                                                                                                                                                                                                                                                                                                 |
| 7851523  | Actinomycin D                | Anti-Bacterial Agents; Antibiotics, Antineoplastic; Nucleic Acid Synthesis Inhibitors; Protein Synthesis Inhibitors;                                                                                                                                                                                                                                                                                                                                                                                   |
| 7853864  | Carbamazepine                | Analgesics, Non-Narcotic; Anticonvulsants; ANTICONVULSANTS; Antimanic Agents; ANTIMANICS; Drugs acting on the nervous system; Psychotropic agents;                                                                                                                                                                                                                                                                                                                                                     |
| 7854036  | Digoxin                      | Anti-Arrhythmia Agents; CARBONIC-ANHYDRASE-INHIBITORS; CARDIOGLYCOSIDES; Cardiotonic Agents; Drugs acting on the blood and cardiovascular system; Enzyme Inhibitors; Enzymes and inhibitors; NA-K-ATPASE-INHIBITORS;                                                                                                                                                                                                                                                                                   |
| 11076615 | Progesterone                 | Activity terms, miscellaneous; Adrenergic alpha-Antagonists; Adrenergic Uptake Inhibitors; Analgesics, Non-Narcotic; ANALGESICS; Anesthetics and drugs relieving fever, inflammation and pain; Anthelmintics; ANTHELMINTICS; ANTIARRHYTHMICS; Anticancer drugs and carcinogens; Anticoagulants; ANTIDEPRESSANTS; Antidepressive Agents; Antidepressive Agents, Tricyclic; ANTIDIABETICS; ANTIEMETICS; Antifungal Agents; ANTIHISTAMINES-H1; ANTIHISTAMINES-H2; Antihypertensive Agents; Anti-Infective |

|          |                                     |                                                                                                                                                                                                                                                                                                                                                                                                                                                                                                                                                                                                                                                                                                                                                                                                                                                                                                                                                                                                                                                                                                                                                                                                                                                                                                                                                                                                                                                                                                                                                                                                                                                                                                                                                    |
|----------|-------------------------------------|----------------------------------------------------------------------------------------------------------------------------------------------------------------------------------------------------------------------------------------------------------------------------------------------------------------------------------------------------------------------------------------------------------------------------------------------------------------------------------------------------------------------------------------------------------------------------------------------------------------------------------------------------------------------------------------------------------------------------------------------------------------------------------------------------------------------------------------------------------------------------------------------------------------------------------------------------------------------------------------------------------------------------------------------------------------------------------------------------------------------------------------------------------------------------------------------------------------------------------------------------------------------------------------------------------------------------------------------------------------------------------------------------------------------------------------------------------------------------------------------------------------------------------------------------------------------------------------------------------------------------------------------------------------------------------------------------------------------------------------------------|
|          |                                     | Agents; Anti-Inflammatory Agents, Non-Steroidal; Antimalarials; Antimanic Agents; Antimicrobials and chemotherapeutics; Antinematodal Agents; Antiparkinson Agents; Antipruritics; ANTIPYRETICS; ANTISEROTONINS; Antithyroid Agents; Biocompatible Materials; Buffers; CALCIUM-ANTAGONISTS; Calcium Channel Blockers; Cardiovascular Agents; Cathartics; Chelating Agents; CHELATORS; Coloring Agents; CYCLOOXYGENASE-1-INHIBITORS; CYCLOOXYGENASE-2-INHIBITORS; Cyclooxygenase Inhibitors; CYCLOOXYGENASE-INHIBITORS; DIAGNOSTICS; Diuretics; Dopamine Agonists; DOPAMINERGICS; Drugs acting on the blood and cardiovascular system; Drugs acting on the gastrointestinal system; Drugs acting on the nervous system; Drugs acting on the skin; Enzyme Inhibitors; Enzymes and inhibitors; Estradiol Antagonists; Estrogen Antagonists; ESTROGEN-ANTAGONISTS; Expectorants; Fertility Agents, Female; Fixatives; Folic Acid Antagonists; Food Additives; Fungicides, Industrial; FUNGICIDES; Gastrointestinal Agents; Gout Suppressants; Histamine Agonists; Histamine H1 Antagonists; Hormones and antagonists; HYPOTENSIVES; IMMUNOSTIMULANTS; IMMUNOSUPPRESSIVES; Indicators and Reagents; Keratolytic Agents; KERATOLYTICS; Lipotropic Agents; Mutagens; Neuromuscular Depolarizing Agents; Nootropic Agents; PARASYMPATHOMIMETICS; PENETRATION-ENHANCERS; Progestins; PROGESTOGENS; PROSTAGLANDIN-ANTAGONISTS; PROTOZOACIDES; PSYCHOSEDATIVES; PSYCHOSTIMULANTS; Psychotropic agents; Radiation-Protective Agents; Radiopharmaceuticals; Selective Estrogen Receptor Modulators; Serotonin Agonists; SYMPATHOLYTICS-ALPHA; THROMBOXANE-ANTAGONISTS; Tocolytic Agents; TRANQUILIZERS; Vasodilator Agents; Vitamins and antagonists; VITAMINS; |
| 7852689  | beta-Propiolactone                  | Anesthetics and drugs relieving fever, inflammation and pain; ANTIPYRETICS; Disinfectants;                                                                                                                                                                                                                                                                                                                                                                                                                                                                                                                                                                                                                                                                                                                                                                                                                                                                                                                                                                                                                                                                                                                                                                                                                                                                                                                                                                                                                                                                                                                                                                                                                                                         |
| 7854754  | Zearalanol                          | ANABOLICS; Estrogens, Non-Steroidal; ESTROGENS; GONADOTROPIN-ANTAGONISTS; Hormones and antagonists;                                                                                                                                                                                                                                                                                                                                                                                                                                                                                                                                                                                                                                                                                                                                                                                                                                                                                                                                                                                                                                                                                                                                                                                                                                                                                                                                                                                                                                                                                                                                                                                                                                                |
| 7853750  | Amphotericin B                      | Amebicides; Anesthetics and drugs relieving fever, inflammation and pain; Anti-Bacterial Agents; Antibiotics, Antifungal; Antifungal Agents; Antiprotozoal Agents; LOCAL-ANESTHETICS;                                                                                                                                                                                                                                                                                                                                                                                                                                                                                                                                                                                                                                                                                                                                                                                                                                                                                                                                                                                                                                                                                                                                                                                                                                                                                                                                                                                                                                                                                                                                                              |
| 11076712 | Zearalenone                         | ANABOLICS; Estrogens, Non-Steroidal; ESTROGENS; Hormones and antagonists;                                                                                                                                                                                                                                                                                                                                                                                                                                                                                                                                                                                                                                                                                                                                                                                                                                                                                                                                                                                                                                                                                                                                                                                                                                                                                                                                                                                                                                                                                                                                                                                                                                                                          |
| 7851581  | Anilazine (Dyrene)                  | Antimicrobials and chemotherapeutics; FUNGICIDES;                                                                                                                                                                                                                                                                                                                                                                                                                                                                                                                                                                                                                                                                                                                                                                                                                                                                                                                                                                                                                                                                                                                                                                                                                                                                                                                                                                                                                                                                                                                                                                                                                                                                                                  |
| 7853307  | p-Chlorophenol                      | Anti-Infective Agents, Local;                                                                                                                                                                                                                                                                                                                                                                                                                                                                                                                                                                                                                                                                                                                                                                                                                                                                                                                                                                                                                                                                                                                                                                                                                                                                                                                                                                                                                                                                                                                                                                                                                                                                                                                      |
| 7854762  | Daidzein (4',7-Dihydroxyisoflavone) | Phytoestrogens;                                                                                                                                                                                                                                                                                                                                                                                                                                                                                                                                                                                                                                                                                                                                                                                                                                                                                                                                                                                                                                                                                                                                                                                                                                                                                                                                                                                                                                                                                                                                                                                                                                                                                                                                    |
| 11076573 | p-Aminophenol                       | Mutagens;                                                                                                                                                                                                                                                                                                                                                                                                                                                                                                                                                                                                                                                                                                                                                                                                                                                                                                                                                                                                                                                                                                                                                                                                                                                                                                                                                                                                                                                                                                                                                                                                                                                                                                                                          |
| 7852834  | 2,2'-Thiobis(4,6-dichlorophenol)    | Anesthetics and drugs relieving fever, inflammation and pain; Anti-Infective Agents, Local; Antiplatyhelminthic Agents; ANTIPYRETICS;                                                                                                                                                                                                                                                                                                                                                                                                                                                                                                                                                                                                                                                                                                                                                                                                                                                                                                                                                                                                                                                                                                                                                                                                                                                                                                                                                                                                                                                                                                                                                                                                              |
| 11075925 | 13-cis-Retinal (Vitamin A aldehyde) | ANGIOGENESIS-INHIBITORS; Anticancer drugs and carcinogens; Enzymes and inhibitors; ORNITHINE-DECARBOXYLASE-INHIBITORS; VITAMINS; Vitamins and                                                                                                                                                                                                                                                                                                                                                                                                                                                                                                                                                                                                                                                                                                                                                                                                                                                                                                                                                                                                                                                                                                                                                                                                                                                                                                                                                                                                                                                                                                                                                                                                      |



|          |                                        |                                                                                                                                                                                                                                                                                                                                                                                                                                                                                                                                                                                                                                                                                                                                                                                                                                                                                                                                                                                                                                                                                                                                                                                                                                                                                                                                                                                                                                                                                                                                                                                                                                                                                                                                                                                                         |
|----------|----------------------------------------|---------------------------------------------------------------------------------------------------------------------------------------------------------------------------------------------------------------------------------------------------------------------------------------------------------------------------------------------------------------------------------------------------------------------------------------------------------------------------------------------------------------------------------------------------------------------------------------------------------------------------------------------------------------------------------------------------------------------------------------------------------------------------------------------------------------------------------------------------------------------------------------------------------------------------------------------------------------------------------------------------------------------------------------------------------------------------------------------------------------------------------------------------------------------------------------------------------------------------------------------------------------------------------------------------------------------------------------------------------------------------------------------------------------------------------------------------------------------------------------------------------------------------------------------------------------------------------------------------------------------------------------------------------------------------------------------------------------------------------------------------------------------------------------------------------|
|          |                                        | antagonists;                                                                                                                                                                                                                                                                                                                                                                                                                                                                                                                                                                                                                                                                                                                                                                                                                                                                                                                                                                                                                                                                                                                                                                                                                                                                                                                                                                                                                                                                                                                                                                                                                                                                                                                                                                                            |
| 7851922  | 1,2-Dichlorobenzene                    | Insecticides;                                                                                                                                                                                                                                                                                                                                                                                                                                                                                                                                                                                                                                                                                                                                                                                                                                                                                                                                                                                                                                                                                                                                                                                                                                                                                                                                                                                                                                                                                                                                                                                                                                                                                                                                                                                           |
| 11076281 | Creosote, wood                         | ANTIAGGREGANTS; Disinfectants; Drugs acting on the blood and cardiovascular system; Expectorants;                                                                                                                                                                                                                                                                                                                                                                                                                                                                                                                                                                                                                                                                                                                                                                                                                                                                                                                                                                                                                                                                                                                                                                                                                                                                                                                                                                                                                                                                                                                                                                                                                                                                                                       |
| 7852085  | N-Ethyl-N-nitrosourea                  | Alkylating Agents; Anticancer drugs and carcinogens; CYTOSTATICS;                                                                                                                                                                                                                                                                                                                                                                                                                                                                                                                                                                                                                                                                                                                                                                                                                                                                                                                                                                                                                                                                                                                                                                                                                                                                                                                                                                                                                                                                                                                                                                                                                                                                                                                                       |
| 11076258 | Casanthranol (Cascara sagrada extract) | Drugs acting on the gastrointestinal system; LAXATIVES;                                                                                                                                                                                                                                                                                                                                                                                                                                                                                                                                                                                                                                                                                                                                                                                                                                                                                                                                                                                                                                                                                                                                                                                                                                                                                                                                                                                                                                                                                                                                                                                                                                                                                                                                                 |
| 7851611  | Azathioprine                           | Anticancer drugs and carcinogens; Antimetabolites, Antineoplastic; Antimetabolites; Antirheumatic Agents; CYTOSTATICS; Immunosuppressive Agents; IMMUNOSUPPRESSIVES;                                                                                                                                                                                                                                                                                                                                                                                                                                                                                                                                                                                                                                                                                                                                                                                                                                                                                                                                                                                                                                                                                                                                                                                                                                                                                                                                                                                                                                                                                                                                                                                                                                    |
| 11076303 | Dazomet                                | ANTHELMINTICS; Antimicrobials and chemotherapeutics; FUNGICIDES; HERBICIDES; Pesticides and plant hormones;                                                                                                                                                                                                                                                                                                                                                                                                                                                                                                                                                                                                                                                                                                                                                                                                                                                                                                                                                                                                                                                                                                                                                                                                                                                                                                                                                                                                                                                                                                                                                                                                                                                                                             |
| 7851608  | 5-Azacytidine                          | Antimetabolites, Antineoplastic; Enzyme Inhibitors;                                                                                                                                                                                                                                                                                                                                                                                                                                                                                                                                                                                                                                                                                                                                                                                                                                                                                                                                                                                                                                                                                                                                                                                                                                                                                                                                                                                                                                                                                                                                                                                                                                                                                                                                                     |
| 11076576 | Parathion                              | ANTICHOLINESTERASES; Cholinesterase Inhibitors; Drugs acting on the nervous system; Insecticides; INSECTICIDES; Pesticides and plant hormones;                                                                                                                                                                                                                                                                                                                                                                                                                                                                                                                                                                                                                                                                                                                                                                                                                                                                                                                                                                                                                                                                                                                                                                                                                                                                                                                                                                                                                                                                                                                                                                                                                                                          |
| 7851733  | Capsaicin                              | Analgesics, Non-Narcotic; Anesthetics and drugs relieving fever, inflammation and pain; RUBEFACIENTS;                                                                                                                                                                                                                                                                                                                                                                                                                                                                                                                                                                                                                                                                                                                                                                                                                                                                                                                                                                                                                                                                                                                                                                                                                                                                                                                                                                                                                                                                                                                                                                                                                                                                                                   |
| 11076205 | Basic orange 2 (C.I. 11270)            | Anesthetics and drugs relieving fever, inflammation and pain; ANTIPYRETICS;                                                                                                                                                                                                                                                                                                                                                                                                                                                                                                                                                                                                                                                                                                                                                                                                                                                                                                                                                                                                                                                                                                                                                                                                                                                                                                                                                                                                                                                                                                                                                                                                                                                                                                                             |
| 11076067 | 2-Pivalyl-1,3-indandione               | INSECTICIDES; Pesticides and plant hormones;                                                                                                                                                                                                                                                                                                                                                                                                                                                                                                                                                                                                                                                                                                                                                                                                                                                                                                                                                                                                                                                                                                                                                                                                                                                                                                                                                                                                                                                                                                                                                                                                                                                                                                                                                            |
| 7851507  | 1-Acetyl-2-phenylhydrazine             | Activity terms, miscellaneous; Adrenergic alpha-Antagonists; Adrenergic Uptake Inhibitors; ANALGESICS; Analgesics, Non-Narcotic; Anesthetics and drugs relieving fever, inflammation and pain; Anthelmintics; ANTHELMINTICS; ANTIARRHYTHMICS; Anticancer drugs and carcinogens; Anticoagulants; ANTIDEPRESSANTS; Antidepressive Agents; Antidepressive Agents, Tricyclic; ANTIDIABETICS; ANTIEMETICS; Antifungal Agents; ANTIHISTAMINES-H1; ANTIHISTAMINES-H2; Antihypertensive Agents; Anti-Infective Agents; Anti-Inflammatory Agents, Non-Steroidal; Antimalarials; Antimanic Agents; Antimicrobials and chemotherapeutics; Antinematodal Agents; Antiparkinson Agents; Antipruritics; ANTIPYRETICS; ANTISEROTONINS; Antithyroid Agents; Biocompatible Materials; Buffers; CALCIUM-ANTAGONISTS; Calcium Channel Blockers; Cardiovascular Agents; Cathartics; Chelating Agents; CHELATORS; Coloring Agents; CYCLOOXYGENASE-1-INHIBITORS; CYCLOOXYGENASE-2-INHIBITORS; Cyclooxygenase Inhibitors; CYCLOOXYGENASE-INHIBITORS; DIAGNOSTICS; Diuretics; Dopamine Agonists; DOPAMINERGICS; Drugs acting on the blood and cardiovascular system; Drugs acting on the gastrointestinal system; Drugs acting on the nervous system; Drugs acting on the skin; Enzyme Inhibitors; Enzymes and inhibitors; Estradiol Antagonists; Estrogen Antagonists; ESTROGEN-ANTAGONISTS; Expectorants; Fertility Agents, Female; Fixatives; Folic Acid Antagonists; Food Additives; FUNGICIDES; Fungicides, Industrial; Gastrointestinal Agents; Gout Suppressants; Histamine Agonists; Histamine H1 Antagonists; Hormones and antagonists; HYPOTENSIVES; IMMUNOSTIMULANTS; IMMUNOSUPPRESSIVES; Indicators and Reagents; Keratolytic Agents; KERATOLYTICS; Lipotropic Agents; Mutagens; Neuromuscular Depolarizing Agents; |

|          |                                                  |                                                                                                                                                                                                                                                                                                                                                                                                                                                   |
|----------|--------------------------------------------------|---------------------------------------------------------------------------------------------------------------------------------------------------------------------------------------------------------------------------------------------------------------------------------------------------------------------------------------------------------------------------------------------------------------------------------------------------|
|          |                                                  | Nootropic Agents; PARASYMPATHOMIMETICS; PENETRATION-ENHANCERS; Progestins; PROGESTOGENS; PROSTAGLANDIN-ANTAGONISTS; PROTOZOACIDES; PSYCHOSEDATIVES; PSYCHOSTIMULANTS; Psychotropic agents; Radiation-Protective Agents; Radiopharmaceuticals; Selective Estrogen Receptor Modulators; Serotonin Agonists; SYMPATHOLYTICS-ALPHA; THROMBOXANE-ANTAGONISTS; Tocolytic Agents; TRANQUILIZERS; Vasodilator Agents; VITAMINS; Vitamins and antagonists; |
| 7852030  | N,N'-Diphenyl-p-phenylenediamine                 | Antioxidants;                                                                                                                                                                                                                                                                                                                                                                                                                                     |
| 11076654 | Sulfacetamide                                    | Anesthetics and drugs relieving fever, inflammation and pain; Anti-Infective Agents, Local; Anti-Infective Agents, Urinary; ANTIPIRETICS;                                                                                                                                                                                                                                                                                                         |
| 7852865  | Triamterene                                      | Activity terms, miscellaneous; Diuretics; DIURETICS;                                                                                                                                                                                                                                                                                                                                                                                              |
| 11076394 | Halothane                                        | Anesthetics and drugs relieving fever, inflammation and pain; Anesthetics, Inhalation; GEN.ANESTHETICS;                                                                                                                                                                                                                                                                                                                                           |
| 7851983  | 4-Dimethylaminoazobenzene                        | Carcinogens; Coloring Agents;                                                                                                                                                                                                                                                                                                                                                                                                                     |
| 11076682 | Thioctic acid                                    | Antioxidants; Vitamin B Complex;                                                                                                                                                                                                                                                                                                                                                                                                                  |
| 7852878  | 2,4,6-Trichlorophenol                            | Mutagens;                                                                                                                                                                                                                                                                                                                                                                                                                                         |
| 7852404  | Nalidixic acid                                   | Anti-Infective Agents; Enzyme Inhibitors;                                                                                                                                                                                                                                                                                                                                                                                                         |
| 11076355 | Econazole nitrate                                | Antifungal Agents; Antimicrobials and chemotherapeutics; FUNGICIDES;                                                                                                                                                                                                                                                                                                                                                                              |
| 7852658  | Piperonyl butoxide                               | Pesticide Synergists;                                                                                                                                                                                                                                                                                                                                                                                                                             |
| 7851996  | 4-Dimethylaminoantipyrine (Aminopyrine)          | ANALGESICS; Anesthetics and drugs relieving fever, inflammation and pain; Anti-Inflammatory Agents, Non-Steroidal; ANTIPIRETICS; Indicators and Reagents;                                                                                                                                                                                                                                                                                         |
| 7854664  | 6-Thioguanine (6-TG)                             | Anticancer drugs and carcinogens; Antimetabolites, Antineoplastic; CYTOSTATICS;                                                                                                                                                                                                                                                                                                                                                                   |
| 7853959  | Iodochlorohydroxyquinoline                       | Anesthetics and drugs relieving fever, inflammation and pain; ANTIPIRETICS;                                                                                                                                                                                                                                                                                                                                                                       |
| 7852208  | Hydroquinone                                     | Anesthetics and drugs relieving fever, inflammation and pain; Antioxidants; ANTIPIRETICS; Mutagens; Radiation-Protective Agents;                                                                                                                                                                                                                                                                                                                  |
| 7852701  | 6-Propyl-2-thiouracil                            | Antimetabolites; Antithyroid Agents; ANTITHYROIDES; Hormones and antagonists;                                                                                                                                                                                                                                                                                                                                                                     |
| 7853373  | Phenyl salicylate                                | Drugs acting on the skin; Plasticizers; RADIOPROTECTIVES;                                                                                                                                                                                                                                                                                                                                                                                         |
| 11076567 | p,p'-DDE (p,p'-Dichlorodiphenyldichloroethylene) | Insecticides;                                                                                                                                                                                                                                                                                                                                                                                                                                     |
| 11076366 | Ethyl methanesulfonate                           | Antineoplastic Agents, Alkylating; Mutagens;                                                                                                                                                                                                                                                                                                                                                                                                      |
| 7852918  | Urea                                             | Activity terms, miscellaneous; PENETRATION-ENHANCERS;                                                                                                                                                                                                                                                                                                                                                                                             |
| 7852140  | Furosemide                                       | Activity terms, miscellaneous; Diuretics; DIURETICS; Enzymes and inhibitors; PHOSPHOLIPASE-INHIBITORS; PROTEIN-KINASE-C-INHIBITORS; Sodium Potassium Chloride Symporter Inhibitors;                                                                                                                                                                                                                                                               |
| 7852322  | 8-Methoxypsoralen                                | Activity terms, miscellaneous; RADIOSENSITIZERS;                                                                                                                                                                                                                                                                                                                                                                                                  |
| 7851807  | Chloropicrin                                     | Chemical Warfare Agents;                                                                                                                                                                                                                                                                                                                                                                                                                          |
| 7852748  | Salicylazosulfapyridine                          | Anesthetics and drugs relieving fever, inflammation and pain; Anti-Infective Agents; Anti-Inflammatory Agents, Non-Steroidal; ANTIPIRETICS; Antirheumatic Agents; Gastrointestinal Agents;                                                                                                                                                                                                                                                        |
| 11076486 | Myleran                                          | Alkylating Agents; Anticancer drugs and carcinogens; Antineoplastic Agents, Alkylating; CYTOSTATICS;                                                                                                                                                                                                                                                                                                                                              |

|          |                                      |                                                                                                                                                                                                                                                                                                                                                                                                                                                                                                                                                                                                                                                                                                                                                                                                    |
|----------|--------------------------------------|----------------------------------------------------------------------------------------------------------------------------------------------------------------------------------------------------------------------------------------------------------------------------------------------------------------------------------------------------------------------------------------------------------------------------------------------------------------------------------------------------------------------------------------------------------------------------------------------------------------------------------------------------------------------------------------------------------------------------------------------------------------------------------------------------|
|          |                                      | Immunosuppressive Agents; Myeloablative Agonists;                                                                                                                                                                                                                                                                                                                                                                                                                                                                                                                                                                                                                                                                                                                                                  |
| 11076334 | Dimenhydrinate                       | Activity terms, miscellaneous; Anesthetics, Local; Anti-Allergic Agents; Anti-Bacterial Agents; ANTIBIOTICS; Antiemetics; ANTIEMETICS; ANTIHISTAMINES-H1; Anti-HIV Agents; Antimetabolites; Antimicrobials and chemotherapeutics; Antiparkinson Agents; Antipruritics; Antitussive Agents; Convulsants; Drugs acting on the gastrointestinal system; Enzyme Inhibitors; Enzymes and inhibitors; GABA Modulators; Histamine H1 Antagonists; HIV-PROTEASE-INHIBITORS; Hypnotics and Sedatives; PEPTIDE-HYDROLASE-INHIBITORS; Psychotropic agents; Reverse Transcriptase Inhibitors; SEDATIVES; VIRUCIDES;                                                                                                                                                                                            |
| 11076206 | Benomyl                              | Anthelmintics; Antimicrobials and chemotherapeutics; FUNGICIDES; Fungicides, Industrial; Tubulin Modulators;                                                                                                                                                                                                                                                                                                                                                                                                                                                                                                                                                                                                                                                                                       |
| 11076627 | Pyrene                               | Fluorescent Dyes;                                                                                                                                                                                                                                                                                                                                                                                                                                                                                                                                                                                                                                                                                                                                                                                  |
| 7852254  | 2-Propanol                           | Solvents;                                                                                                                                                                                                                                                                                                                                                                                                                                                                                                                                                                                                                                                                                                                                                                                          |
| 11076566 | p -n -Nonylphenol                    | Anesthetics and drugs relieving fever, inflammation and pain; Anti-Infective Agents, Local; ANTIPYRETICS; Disinfectants; Sclerosing Solutions;                                                                                                                                                                                                                                                                                                                                                                                                                                                                                                                                                                                                                                                     |
| 11076289 | cyanuric chloride                    | Cross-Linking Reagents;                                                                                                                                                                                                                                                                                                                                                                                                                                                                                                                                                                                                                                                                                                                                                                            |
| 11076489 | N,N,N',N' - Tetramethylhexanediamine | Heparin Antagonists;                                                                                                                                                                                                                                                                                                                                                                                                                                                                                                                                                                                                                                                                                                                                                                               |
| 11076229 | beta-Resorcylic acid                 | Antifungal Agents; Anti-Infective Agents; Antimetabolites, Antineoplastic; Food Preservatives;                                                                                                                                                                                                                                                                                                                                                                                                                                                                                                                                                                                                                                                                                                     |
| 7853280  | Diethylethanolamine                  | Anti-Inflammatory Agents, Non-Steroidal;                                                                                                                                                                                                                                                                                                                                                                                                                                                                                                                                                                                                                                                                                                                                                           |
| 11076656 | sulfamic acid; midosulfonic acid     | Herbicides; Indicators and Reagents;                                                                                                                                                                                                                                                                                                                                                                                                                                                                                                                                                                                                                                                                                                                                                               |
| 11076151 | 5-Aminosalicylic acid                | Anesthetics and drugs relieving fever, inflammation and pain; Anti-Inflammatory Agents, Non-Steroidal; ANTIPYRETICS;                                                                                                                                                                                                                                                                                                                                                                                                                                                                                                                                                                                                                                                                               |
| 7852852  | Toluene                              | Solvents;                                                                                                                                                                                                                                                                                                                                                                                                                                                                                                                                                                                                                                                                                                                                                                                          |
| 7853227  | Methyl acetate                       | ANALGESICS; Analgesics, Opioid; Anesthetics and drugs relieving fever, inflammation and pain; Narcotics;                                                                                                                                                                                                                                                                                                                                                                                                                                                                                                                                                                                                                                                                                           |
| 7852402  | Busulfan                             | Alkylating Agents; Anticancer drugs and carcinogens; Antineoplastic Agents, Alkylating; CYTOSTATICS; Immunosuppressive Agents; Myeloablative Agonists;                                                                                                                                                                                                                                                                                                                                                                                                                                                                                                                                                                                                                                             |
| 7852811  | tetrachloroethylene                  | ANTHELMINTICS; Antimicrobials and chemotherapeutics; Carcinogens; Environmental Pollutants; Solvents;                                                                                                                                                                                                                                                                                                                                                                                                                                                                                                                                                                                                                                                                                              |
| 7853354  | n-Hexanol                            | Anesthetics; Nicotinic Antagonists;                                                                                                                                                                                                                                                                                                                                                                                                                                                                                                                                                                                                                                                                                                                                                                |
| 7852155  | Glycerol                             | Cryoprotective Agents;                                                                                                                                                                                                                                                                                                                                                                                                                                                                                                                                                                                                                                                                                                                                                                             |
| 7851674  | Bisphenol A                          | Air Pollutants, Occupational; Estrogens, Non-Steroidal; Free Radical Scavengers;                                                                                                                                                                                                                                                                                                                                                                                                                                                                                                                                                                                                                                                                                                                   |
| 7851824  | Citric Acid                          | Activity terms, miscellaneous; Adrenergic alpha-Antagonists; Adrenergic Uptake Inhibitors; ANALGESICS; Analgesics, Non-Narcotic; Anesthetics and drugs relieving fever, inflammation and pain; Anthelmintics; ANTHELMINTICS; ANTIARRHYTHMICS; Anticancer drugs and carcinogens; Anticoagulants; ANTIDEPRESSANTS; Antidepressive Agents; Antidepressive Agents, Tricyclic; ANTIDIABETICS; ANTIEMETICS; Antifungal Agents; ANTIHISTAMINES-H1; ANTIHISTAMINES-H2; Antihypertensive Agents; Anti-Infective Agents; Anti-Inflammatory Agents, Non-Steroidal; Antimalarials; Antimanic Agents; Antimicrobials and chemotherapeutics; Antinematodal Agents; Antiparkinson Agents; Antipruritics; ANTIPYRETICS; ANTISEROTONINS; Antithyroid Agents; Biocompatible Materials; Buffers; CALCIUM-ANTAGONISTS; |

|          |                        |                                                                                                                                                                                                                                                                                                                                                                                                                                                                                                                                                                                                                                                                                                                                                                                                                                                                                                                                                                                                                                                                                                                                                                                                                                                                                                                                                                                                                                                        |
|----------|------------------------|--------------------------------------------------------------------------------------------------------------------------------------------------------------------------------------------------------------------------------------------------------------------------------------------------------------------------------------------------------------------------------------------------------------------------------------------------------------------------------------------------------------------------------------------------------------------------------------------------------------------------------------------------------------------------------------------------------------------------------------------------------------------------------------------------------------------------------------------------------------------------------------------------------------------------------------------------------------------------------------------------------------------------------------------------------------------------------------------------------------------------------------------------------------------------------------------------------------------------------------------------------------------------------------------------------------------------------------------------------------------------------------------------------------------------------------------------------|
|          |                        | Calcium Channel Blockers; Cardiovascular Agents; Cathartics; Chelating Agents; CHELATORS; Coloring Agents; CYCLOOXYGENASE-1-INHIBITORS; CYCLOOXYGENASE-2-INHIBITORS; Cyclooxygenase Inhibitors; CYCLOOXYGENASE-INHIBITORS; DIAGNOSTICS; Diuretics; Dopamine Agonists; DOPAMINERGICS; Drugs acting on the blood and cardiovascular system; Drugs acting on the gastrointestinal system; Drugs acting on the nervous system; Drugs acting on the skin; Enzyme Inhibitors; Enzymes and inhibitors; Estradiol Antagonists; Estrogen Antagonists; ESTROGEN-ANTAGONISTS; Expectorants; Fertility Agents, Female; Fixatives; Folic Acid Antagonists; Food Additives; FUNGICIDES; Fungicides, Industrial; Gastrointestinal Agents; Gout Suppressants; Histamine Agonists; Histamine H1 Antagonists; Hormones and antagonists; HYPOTENSIVES; IMMUNOSTIMULANTS; IMMUNOSUPPRESSIVES; Indicators and Reagents; Keratolytic Agents; KERATOLYTICS; Lipotropic Agents; Mutagens; Neuromuscular Depolarizing Agents; Nootropic Agents; PARASYMPATHOMIMETICS; PENETRATION-ENHANCERS; Progestins; PROGESTOGENS; PROSTAGLANDIN-ANTAGONISTS; PROTOZOACIDES; PSYCHOSEDATIVES; PSYCHOSTIMULANTS; Psychotropic agents; Radiation-Protective Agents; Radiopharmaceuticals; Selective Estrogen Receptor Modulators; Serotonin Agonists; SYMPATHOLYTICS-ALPHA; THROMBOXANE-ANTAGONISTS; Tocolytic Agents; TRANQUILIZERS; Vasodilator Agents; Vitamins and antagonists; VITAMINS; |
| 11076319 | dicyclohexylamine      | Anesthetics and drugs relieving fever, inflammation and pain; ANTIPYRETICS; Enzyme Inhibitors; Explosive Agents;                                                                                                                                                                                                                                                                                                                                                                                                                                                                                                                                                                                                                                                                                                                                                                                                                                                                                                                                                                                                                                                                                                                                                                                                                                                                                                                                       |
| 11076547 | o-methoxyphenol        | ANTIAGGREGANTS; Disinfectants; Drugs acting on the blood and cardiovascular system; Expectorants;                                                                                                                                                                                                                                                                                                                                                                                                                                                                                                                                                                                                                                                                                                                                                                                                                                                                                                                                                                                                                                                                                                                                                                                                                                                                                                                                                      |
| 11076677 | tetraethylenepentamine | Anion Exchange Resins; ANTIARTERIOSCLEROTICS; Antilipemic Agents; Drugs acting on the blood and cardiovascular system;                                                                                                                                                                                                                                                                                                                                                                                                                                                                                                                                                                                                                                                                                                                                                                                                                                                                                                                                                                                                                                                                                                                                                                                                                                                                                                                                 |
| 11076619 | Propylparaben          | Anesthetics and drugs relieving fever, inflammation and pain; ANTIPYRETICS;                                                                                                                                                                                                                                                                                                                                                                                                                                                                                                                                                                                                                                                                                                                                                                                                                                                                                                                                                                                                                                                                                                                                                                                                                                                                                                                                                                            |
| 7853008  | maleic acid            | Activity terms, miscellaneous; Adrenergic alpha-Antagonists; Adrenergic Uptake Inhibitors; ANALGESICS; Analgesics, Non-Narcotic; Anesthetics and drugs relieving fever, inflammation and pain; Anthelmintics; ANTHELMINTICS; ANTIARRHYTHMICS; Anticancer drugs and carcinogens; Anticoagulants; ANTIDEPRESSANTS; Antidepressive Agents; Antidepressive Agents, Tricyclic; ANTIDIABETICS; ANTIEMETICS; Antifungal Agents; ANTIHISTAMINES-H1; ANTIHISTAMINES-H2; Antihypertensive Agents; Anti-Infective Agents; Anti-Inflammatory Agents, Non-Steroidal; Antimalarials; Antimanic Agents; Antimicrobials and chemotherapeutics; Antinematodal Agents; Antiparkinson Agents; Antipruritics; ANTIPYRETICS; ANTISEROTONINS; Antithyroid Agents; Biocompatible Materials; Buffers; CALCIUM-ANTAGONISTS; Calcium Channel Blockers; Cardiovascular Agents; Cathartics; Chelating Agents; CHELATORS; Coloring Agents; CYCLOOXYGENASE-1-INHIBITORS; CYCLOOXYGENASE-2-INHIBITORS; Cyclooxygenase Inhibitors; CYCLOOXYGENASE-INHIBITORS; DIAGNOSTICS; Diuretics;                                                                                                                                                                                                                                                                                                                                                                                                  |

|          |                         |                                                                                                                                                                                                                                                                                                                                                                                                                                                                                                                                                                                                                                                                                                                                                                                                                                                                                                                                                                                                                                                                                                                                                                                                     |
|----------|-------------------------|-----------------------------------------------------------------------------------------------------------------------------------------------------------------------------------------------------------------------------------------------------------------------------------------------------------------------------------------------------------------------------------------------------------------------------------------------------------------------------------------------------------------------------------------------------------------------------------------------------------------------------------------------------------------------------------------------------------------------------------------------------------------------------------------------------------------------------------------------------------------------------------------------------------------------------------------------------------------------------------------------------------------------------------------------------------------------------------------------------------------------------------------------------------------------------------------------------|
|          |                         | Dopamine Agonists; DOPAMINERGICS; Drugs acting on the blood and cardiovascular system; Drugs acting on the gastrointestinal system; Drugs acting on the nervous system; Drugs acting on the skin; Enzyme Inhibitors; Enzymes and inhibitors; Estradiol Antagonists; Estrogen Antagonists; ESTROGEN-ANTAGONISTS; Expectorants; Fertility Agents, Female; Fixatives; Folic Acid Antagonists; Food Additives; Fungicides, Industrial; FUNGICIDES; Gastrointestinal Agents; Gout Suppressants; Histamine Agonists; Histamine H1 Antagonists; Hormones and antagonists; HYPOTENSIVES; IMMUNOSTIMULANTS; IMMUNOSUPPRESSIVES; Indicators and Reagents; Keratolytic Agents; KERATOLYTICS; Lipotropic Agents; Mutagens; Neuromuscular Depolarizing Agents; Nootropic Agents; PARASYMPATHOMIMETICS; PENETRATION-ENHANCERS; Progestins; PROGESTOGENS; PROSTAGLANDIN-ANTAGONISTS; PROTOZOACIDES; PSYCHOSEDATIVES; PSYCHOSTIMULANTS; Psychotropic agents; Radiation-Protective Agents; Radiopharmaceuticals; Selective Estrogen Receptor Modulators; Serotonin Agonists; SYMPATHOLYTICS-ALPHA; THROMBOXANE-ANTAGONISTS; Tocolytic Agents; TRANQUILIZERS; Vasodilator Agents; Vitamins and antagonists; VITAMINS; |
| 7853109  | 2-Methylbutyric acid    | Antineoplastic Agents; Antiviral Agents; Dental Materials; Ophthalmic Solutions;                                                                                                                                                                                                                                                                                                                                                                                                                                                                                                                                                                                                                                                                                                                                                                                                                                                                                                                                                                                                                                                                                                                    |
| 7854264  | Lactic acid             | Activity terms, miscellaneous; Adrenergic Agents; CALCIUM-ANTAGONISTS; Calcium Channel Blockers; CALMODULIN-ANTAGONISTS; CARBONIC-ANHYDRASE-INHIBITORS; Drugs acting on the blood and cardiovascular system; Enzymes and inhibitors; Vasodilator Agents;                                                                                                                                                                                                                                                                                                                                                                                                                                                                                                                                                                                                                                                                                                                                                                                                                                                                                                                                            |
| 7851600  | Acetylsalicylic acid    | Analgesics; ANALGESICS; Anesthetics and drugs relieving fever, inflammation and pain; ANTIAGGREGANTS; ANTIHISTAMINES-H2; Anti-Inflammatory Agents, Non-Steroidal; ANTIPYRETICS; CYCLOOXYGENASE-1-INHIBITORS; Cyclooxygenase Inhibitors; CYCLOOXYGENASE-INHIBITORS; Drugs acting on the blood and cardiovascular system; Drugs acting on the gastrointestinal system; Enzymes and inhibitors; Fibrinolytic Agents; Hormones and antagonists; Platelet Aggregation Inhibitors; PROSTAGLANDIN-ANTAGONISTS;                                                                                                                                                                                                                                                                                                                                                                                                                                                                                                                                                                                                                                                                                             |
| 11076645 | Sodium hydrogen sulfate | Cathartics;                                                                                                                                                                                                                                                                                                                                                                                                                                                                                                                                                                                                                                                                                                                                                                                                                                                                                                                                                                                                                                                                                                                                                                                         |
| 11076401 | Imidazole               | Enzyme Inhibitors; Hormones and antagonists; THROMBOXANE-ANTAGONISTS;                                                                                                                                                                                                                                                                                                                                                                                                                                                                                                                                                                                                                                                                                                                                                                                                                                                                                                                                                                                                                                                                                                                               |
| 7854764  | 4-Octylphenol           | Estrogens, Non-Steroidal;                                                                                                                                                                                                                                                                                                                                                                                                                                                                                                                                                                                                                                                                                                                                                                                                                                                                                                                                                                                                                                                                                                                                                                           |
| 7853293  | N,N-dimethylbenzylamine | Anesthetics and drugs relieving fever, inflammation and pain; Anti-Infective Agents, Local; ANTIPYRETICS; Detergents; Disinfectants; Preservatives, Pharmaceutical;                                                                                                                                                                                                                                                                                                                                                                                                                                                                                                                                                                                                                                                                                                                                                                                                                                                                                                                                                                                                                                 |
| 7851613  | Sodium azide            | Enzyme Inhibitors; Indicators and Reagents; Mutagens; Vasodilator Agents;                                                                                                                                                                                                                                                                                                                                                                                                                                                                                                                                                                                                                                                                                                                                                                                                                                                                                                                                                                                                                                                                                                                           |
| 7851941  | Dichlorvos (DDVP)       | Anthelmintics; ANTHELMINTICS; Antimicrobials and chemotherapeutics; Cholinesterase Inhibitors; Insecticides; INSECTICIDES; Pesticides and plant hormones;                                                                                                                                                                                                                                                                                                                                                                                                                                                                                                                                                                                                                                                                                                                                                                                                                                                                                                                                                                                                                                           |
| 11076374 | Fluoranthene            | Enzyme Inhibitors;                                                                                                                                                                                                                                                                                                                                                                                                                                                                                                                                                                                                                                                                                                                                                                                                                                                                                                                                                                                                                                                                                                                                                                                  |
| 7853361  | n-Octanol               | Solvents;                                                                                                                                                                                                                                                                                                                                                                                                                                                                                                                                                                                                                                                                                                                                                                                                                                                                                                                                                                                                                                                                                                                                                                                           |
| 11076597 | phosphoric acid         | Anti-Bacterial Agents; ANTIBIOTICS; Antimicrobials and                                                                                                                                                                                                                                                                                                                                                                                                                                                                                                                                                                                                                                                                                                                                                                                                                                                                                                                                                                                                                                                                                                                                              |

|          |                         |                                                                                                                                                                                                                                                                                                                                                                                                                                                                                                                                                                                                                                                                                                                                                                                                                                                                                                                                                                                                    |
|----------|-------------------------|----------------------------------------------------------------------------------------------------------------------------------------------------------------------------------------------------------------------------------------------------------------------------------------------------------------------------------------------------------------------------------------------------------------------------------------------------------------------------------------------------------------------------------------------------------------------------------------------------------------------------------------------------------------------------------------------------------------------------------------------------------------------------------------------------------------------------------------------------------------------------------------------------------------------------------------------------------------------------------------------------|
|          |                         | chemotherapeutics; Cathartics; Dental Materials;                                                                                                                                                                                                                                                                                                                                                                                                                                                                                                                                                                                                                                                                                                                                                                                                                                                                                                                                                   |
| 11076292 | Cycloheximide           | Antibiotics, Antifungal; ANTIBIOTICS; ANTICONVULSANTS; Antimicrobials and chemotherapeutics; Drugs acting on the nervous system; FUNGICIDES; GABA-ANTAGONISTS; Protein Synthesis Inhibitors;                                                                                                                                                                                                                                                                                                                                                                                                                                                                                                                                                                                                                                                                                                                                                                                                       |
| 11076420 | Kepona                  | Insecticides; INSECTICIDES; Pesticides and plant hormones;                                                                                                                                                                                                                                                                                                                                                                                                                                                                                                                                                                                                                                                                                                                                                                                                                                                                                                                                         |
| 11076463 | Methyl testosterone     | Anabolic Agents; ANDROGENS; Antineoplastic Agents, Hormonal; Hormones and antagonists;                                                                                                                                                                                                                                                                                                                                                                                                                                                                                                                                                                                                                                                                                                                                                                                                                                                                                                             |
| 7851757  | Chloramphenicol         | Anti-Bacterial Agents; ANTIBIOTICS; Antimicrobials and chemotherapeutics; Protein Synthesis Inhibitors;                                                                                                                                                                                                                                                                                                                                                                                                                                                                                                                                                                                                                                                                                                                                                                                                                                                                                            |
| 11076700 | Triton X-100            | Activity terms, miscellaneous; Antifoaming Agents; Detergents; Excipients; Spermatocidal Agents; Surface-Active Agents; SURFACTANTS;                                                                                                                                                                                                                                                                                                                                                                                                                                                                                                                                                                                                                                                                                                                                                                                                                                                               |
| 7854790  | 5a-Dihydrotestosterone  | Androgens;                                                                                                                                                                                                                                                                                                                                                                                                                                                                                                                                                                                                                                                                                                                                                                                                                                                                                                                                                                                         |
| 11076398 | Hydroxyflutamide        | Androgen Antagonists; ANDROGEN-ANTAGONISTS; Hormones and antagonists;                                                                                                                                                                                                                                                                                                                                                                                                                                                                                                                                                                                                                                                                                                                                                                                                                                                                                                                              |
| 11076280 | Colchicine              | Activity terms, miscellaneous; Anesthetics and drugs relieving fever, inflammation and pain; Anticancer drugs and carcinogens; ANTIPYRETICS; CYTOSTATICS; Gout Suppressants; P-GLYCOPROTEIN-INHIBITORS; SELECTIN-ANTAGONISTS; Tubulin Modulators;                                                                                                                                                                                                                                                                                                                                                                                                                                                                                                                                                                                                                                                                                                                                                  |
| 7854842  | Phenolphthalin          | Cathartics; Drugs acting on the gastrointestinal system; Indicators and Reagents; LAXATIVES;                                                                                                                                                                                                                                                                                                                                                                                                                                                                                                                                                                                                                                                                                                                                                                                                                                                                                                       |
| 11076614 | Procymidone             | Fungicides, Industrial;                                                                                                                                                                                                                                                                                                                                                                                                                                                                                                                                                                                                                                                                                                                                                                                                                                                                                                                                                                            |
| 7854795  | Testosterone            | ANABOLICS; Androgens; ANDROGENS; Hormones and antagonists;                                                                                                                                                                                                                                                                                                                                                                                                                                                                                                                                                                                                                                                                                                                                                                                                                                                                                                                                         |
| 7851876  | Dexamethasone           | Antiemetics; Anti-Inflammatory Agents; Antineoplastic Agents, Hormonal; CORTICOSTEROIDS; Glucocorticoids; Hormones and antagonists;                                                                                                                                                                                                                                                                                                                                                                                                                                                                                                                                                                                                                                                                                                                                                                                                                                                                |
| 7851866  | p,p' -DDE               | Insecticides;                                                                                                                                                                                                                                                                                                                                                                                                                                                                                                                                                                                                                                                                                                                                                                                                                                                                                                                                                                                      |
| 11076646 | Sodium lauryl sulfate   | Surface-Active Agents;                                                                                                                                                                                                                                                                                                                                                                                                                                                                                                                                                                                                                                                                                                                                                                                                                                                                                                                                                                             |
| 11076691 | Trichloroacetic acid    | Caustics;                                                                                                                                                                                                                                                                                                                                                                                                                                                                                                                                                                                                                                                                                                                                                                                                                                                                                                                                                                                          |
| 11076260 | Cetylpyridinium bromide | Anesthetics and drugs relieving fever, inflammation and pain; Anti-Infective Agents, Local; ANTIPYRETICS; Detergents; Hormone Antagonists; Hormones and antagonists; LULIBERIN-ANTAGONISTS; RELEASING-FACTOR-INHIBITORS;                                                                                                                                                                                                                                                                                                                                                                                                                                                                                                                                                                                                                                                                                                                                                                           |
| 7854794  | Progesterone            | Activity terms, miscellaneous; Adrenergic alpha-Antagonists; Adrenergic Uptake Inhibitors; Analgesics, Non-Narcotic; ANALGESICS; Anesthetics and drugs relieving fever, inflammation and pain; Anthelmintics; ANTHELMINTICS; ANTIARRHYTHMICS; Anticancer drugs and carcinogens; Anticoagulants; ANTIDEPRESSANTS; Antidepressive Agents; Antidepressive Agents, Tricyclic; ANTIDIABETICS; ANTIEMETICS; Antifungal Agents; ANTIHISTAMINES-H1; ANTIHISTAMINES-H2; Antihypertensive Agents; Anti-Infective Agents; Anti-Inflammatory Agents, Non-Steroidal; Antimalarials; Antimanic Agents; Antimicrobials and chemotherapeutics; Antinematodal Agents; Antiparkinson Agents; Antipruritics; ANTIPYRETICS; ANTISEROTONINS; Antithyroid Agents; Biocompatible Materials; Buffers; CALCIUM-ANTAGONISTS; Calcium Channel Blockers; Cardiovascular Agents; Cathartics; Chelating Agents; CHELATORS; Coloring Agents; CYCLOOXYGENASE-1-INHIBITORS; CYCLOOXYGENASE-2-INHIBITORS; Cyclooxygenase Inhibitors; |

|          |                      |                                                                                                                                                                                                                                                                                                                                                                                                                                                                                                                                                                                                                                                                                                                                                                                                                                                                                                                                                                                                                                                                                                                                                                                                                                                                                                                                                                                                                                                                                                                               |
|----------|----------------------|-------------------------------------------------------------------------------------------------------------------------------------------------------------------------------------------------------------------------------------------------------------------------------------------------------------------------------------------------------------------------------------------------------------------------------------------------------------------------------------------------------------------------------------------------------------------------------------------------------------------------------------------------------------------------------------------------------------------------------------------------------------------------------------------------------------------------------------------------------------------------------------------------------------------------------------------------------------------------------------------------------------------------------------------------------------------------------------------------------------------------------------------------------------------------------------------------------------------------------------------------------------------------------------------------------------------------------------------------------------------------------------------------------------------------------------------------------------------------------------------------------------------------------|
|          |                      | CYCLOOXYGENASE-INHIBITORS; DIAGNOSTICS; Diuretics; Dopamine Agonists; DOPAMINERGICS; Drugs acting on the blood and cardiovascular system; Drugs acting on the gastrointestinal system; Drugs acting on the nervous system; Drugs acting on the skin; Enzyme Inhibitors; Enzymes and inhibitors; Estradiol Antagonists; Estrogen Antagonists; ESTROGEN-ANTAGONISTS; Expectorants; Fertility Agents, Female; Fixatives; Folic Acid Antagonists; Food Additives; Fungicides, Industrial; FUNGICIDES; Gastrointestinal Agents; Gout Suppressants; Histamine Agonists; Histamine H1 Antagonists; Hormones and antagonists; HYPOTENSIVES; IMMUNOSTIMULANTS; IMMUNOSUPPRESSIVES; Indicators and Reagents; Keratolytic Agents; KERATOLYTICS; Lipotropic Agents; Mutagens; Neuromuscular Depolarizing Agents; Nootropic Agents; PARASYMPATHOMIMETICS; PENETRATION-ENHANCERS; Progestins; PROGESTOGENS; PROSTAGLANDIN-ANTAGONISTS; PROTOZOACIDES; PSYCHOSEDATIVES; PSYCHOSTIMULANTS; Psychotropic agents; Radiation-Protective Agents; Radiopharmaceuticals; Selective Estrogen Receptor Modulators; Serotonin Agonists; SYMPATHOLYTICS-ALPHA; THROMBOXANE-ANTAGONISTS; Tocolytic Agents; TRANQUILIZERS; Vasodilator Agents; Vitamins and antagonists; VITAMINS;                                                                                                                                                                                                                                                                        |
| 7852870  | Trichloroacetic acid | Caustics;                                                                                                                                                                                                                                                                                                                                                                                                                                                                                                                                                                                                                                                                                                                                                                                                                                                                                                                                                                                                                                                                                                                                                                                                                                                                                                                                                                                                                                                                                                                     |
| 11076262 | Chlorhexidine        | Anesthetics and drugs relieving fever, inflammation and pain; Anti-Infective Agents; Anti-Infective Agents, Local; ANTIPYRETICS; Dentifrices; Dermatologic Agents; Disinfectants; Mouthwashes;                                                                                                                                                                                                                                                                                                                                                                                                                                                                                                                                                                                                                                                                                                                                                                                                                                                                                                                                                                                                                                                                                                                                                                                                                                                                                                                                |
| 11076195 | Amitriptyline HCl    | Activity terms, miscellaneous; Adrenergic alpha-Antagonists; Adrenergic Uptake Inhibitors; ANALGESICS; Analgesics, Non-Narcotic; Anesthetics and drugs relieving fever, inflammation and pain; Anthelmintics; ANTHELMINTICS; ANTIARRHYTHMICS; Anticancer drugs and carcinogens; Anticoagulants; ANTIDEPRESSANTS; Antidepressive Agents; Antidepressive Agents, Tricyclic; ANTIDIABETICS; ANTIEMETICS; Antifungal Agents; ANTIHISTAMINES-H1; ANTIHISTAMINES-H2; Antihypertensive Agents; Anti-Infective Agents; Anti-Inflammatory Agents, Non-Steroidal; Antimalarials; Antimanic Agents; Antimicrobials and chemotherapeutics; Antinematodal Agents; Antiparkinson Agents; Antipruritics; ANTIPYRETICS; ANTISEROTONINS; Antithyroid Agents; Biocompatible Materials; Buffers; CALCIUM-ANTAGONISTS; Calcium Channel Blockers; Cardiovascular Agents; Cathartics; Chelating Agents; CHELATORS; Coloring Agents; CYCLOOXYGENASE-1-INHIBITORS; CYCLOOXYGENASE-2-INHIBITORS; Cyclooxygenase Inhibitors; CYCLOOXYGENASE-INHIBITORS; DIAGNOSTICS; Diuretics; Dopamine Agonists; DOPAMINERGICS; Drugs acting on the blood and cardiovascular system; Drugs acting on the gastrointestinal system; Drugs acting on the nervous system; Drugs acting on the skin; Enzyme Inhibitors; Enzymes and inhibitors; Estradiol Antagonists; Estrogen Antagonists; ESTROGEN-ANTAGONISTS; Expectorants; Fertility Agents, Female; Fixatives; Folic Acid Antagonists; Food Additives; FUNGICIDES; Fungicides, Industrial; Gastrointestinal Agents; |

|          |                               |                                                                                                                                                                                                                                                                                                                                                                                                                                                                                                                                                                                                                                                                                                                             |
|----------|-------------------------------|-----------------------------------------------------------------------------------------------------------------------------------------------------------------------------------------------------------------------------------------------------------------------------------------------------------------------------------------------------------------------------------------------------------------------------------------------------------------------------------------------------------------------------------------------------------------------------------------------------------------------------------------------------------------------------------------------------------------------------|
|          |                               | Gout Suppressants; Histamine Agonists; Histamine H1 Antagonists; Hormones and antagonists; HYPOTENSIVES; IMMUNOSTIMULANTS; IMMUNOSUPPRESSIVES; Indicators and Reagents; Keratolytic Agents; KERATOLYTICS; Lipotropic Agents; Mutagens; Neuromuscular Depolarizing Agents; Nootropic Agents; PARASYMPATHOMIMETICS; PENETRATION-ENHANCERS; Progestins; PROGESTOGENS; PROSTAGLANDIN-ANTAGONISTS; PROTOZOACIDES; PSYCHOSEDATIVES; PSYCHOSTIMULANTS; Psychotropic agents; Radiation-Protective Agents; Radiopharmaceuticals; Selective Estrogen Receptor Modulators; Serotonin Agonists; SYMPATHOLYTICS-ALPHA; THROMBOXANE-ANTAGONISTS; Tocolytic Agents; TRANQUILIZERS; Vasodilator Agents; VITAMINS; Vitamins and antagonists; |
| 7852768  | Sodium hypochlorite           | Disinfectants; Oxidants;                                                                                                                                                                                                                                                                                                                                                                                                                                                                                                                                                                                                                                                                                                    |
| 7854806  | 4-Hydroxytamoxifen            | Estrogen Antagonists;                                                                                                                                                                                                                                                                                                                                                                                                                                                                                                                                                                                                                                                                                                       |
| 7852690  | Propranolol HCl               | Adrenergic beta-Antagonists; Anti-Anxiety Agents; Anti-Arrhythmia Agents; ANTIARRHYTHMICS; Antihypertensive Agents; Drugs acting on the blood and cardiovascular system; Drugs acting on the nervous system; HYPOTENSIVES; SYMPATHOLYTICS-BETA; Vasodilator Agents;                                                                                                                                                                                                                                                                                                                                                                                                                                                         |
| 11076707 | Verapamil HCl                 | Anti-Arrhythmia Agents; Anticancer drugs and carcinogens; CALCIUM-ANTAGONISTS; Calcium Channel Blockers; CARBONIC-ANHYDRASE-INHIBITORS; CYTOSTATICS; Drugs acting on the blood and cardiovascular system; Enzymes and inhibitors; P-GLYCOPROTEIN-INHIBITORS; PROTEIN-KINASE-C-INHIBITORS; Vasodilator Agents;                                                                                                                                                                                                                                                                                                                                                                                                               |
| 7854866  | Corticosterone                | Anti-Inflammatory Agents; CORTICOSTEROIDS; Hormones and antagonists;                                                                                                                                                                                                                                                                                                                                                                                                                                                                                                                                                                                                                                                        |
| 7852592  | Parathion                     | ANTICHOLINESTERASES; Cholinesterase Inhibitors; Drugs acting on the nervous system; Insecticides; INSECTICIDES; Pesticides and plant hormones;                                                                                                                                                                                                                                                                                                                                                                                                                                                                                                                                                                              |
| 7852952  | Zearalenone                   | ANABOLICS; Estrogens, Non-Steroidal; ESTROGENS; Hormones and antagonists;                                                                                                                                                                                                                                                                                                                                                                                                                                                                                                                                                                                                                                                   |
| 7854325  | Meprobamate                   | Anti-Anxiety Agents; Anticonvulsants; Hypnotics and Sedatives; Muscle Relaxants, Central; PSYCHOSEDATIVES; Psychotropic agents; TRANQUILIZERS;                                                                                                                                                                                                                                                                                                                                                                                                                                                                                                                                                                              |
| 7851858  | Cyproterone acetate           | Androgen Antagonists; Antineoplastic Agents; Contraceptive Agents, Male;                                                                                                                                                                                                                                                                                                                                                                                                                                                                                                                                                                                                                                                    |
| 7852148  | Gibberellic acid              | Plant Growth Regulators;                                                                                                                                                                                                                                                                                                                                                                                                                                                                                                                                                                                                                                                                                                    |
| 11076251 | Captan 90-concentrate (solid) | Anesthetics and drugs relieving fever, inflammation and pain; Antimicrobials and chemotherapeutics; ANTIPYRETICS; FUNGICIDES; Fungicides, Industrial;                                                                                                                                                                                                                                                                                                                                                                                                                                                                                                                                                                       |
| 7854781  | o,p' -DDT                     | Estrogens, Non-Steroidal;                                                                                                                                                                                                                                                                                                                                                                                                                                                                                                                                                                                                                                                                                                   |
| 7852260  | Kaempferol                    | Enzymes and inhibitors; PEPTIDE-HYDROLASE-INHIBITORS;                                                                                                                                                                                                                                                                                                                                                                                                                                                                                                                                                                                                                                                                       |
| 11076377 | Fluoxymestrone                | Anabolic Agents; ANDROGENS; Antineoplastic Agents, Hormonal; Hormones and antagonists;                                                                                                                                                                                                                                                                                                                                                                                                                                                                                                                                                                                                                                      |
| 11076307 | Deoxycholic acid sodium salt  | Detergents;                                                                                                                                                                                                                                                                                                                                                                                                                                                                                                                                                                                                                                                                                                                 |
| 11076124 | 4-Androstenedione             | ANDROGENS; Hormones and antagonists;                                                                                                                                                                                                                                                                                                                                                                                                                                                                                                                                                                                                                                                                                        |
| 11076362 | Ethyl acrylate (inhibited)    | Carcinogens; Mutagens;                                                                                                                                                                                                                                                                                                                                                                                                                                                                                                                                                                                                                                                                                                      |
| 7853927  | Chlorothiazide                | Activity terms, miscellaneous; Antihypertensive Agents; CARBONIC-ANHYDRASE-INHIBITORS; Diuretics; DIURETICS; Drugs acting on the blood and cardiovascular                                                                                                                                                                                                                                                                                                                                                                                                                                                                                                                                                                   |



|          |                                               |                                                                                                                                                                                                                         |
|----------|-----------------------------------------------|-------------------------------------------------------------------------------------------------------------------------------------------------------------------------------------------------------------------------|
|          |                                               | system; Enzymes and inhibitors; HYPOTENSIVES; Sodium Chloride Symporter Inhibitors;                                                                                                                                     |
| 11076364 | Ethyl cyanoacrylate                           | Hemostatics;                                                                                                                                                                                                            |
| 7852519  | N-Nitrosodiethanolamine                       | Carcinogens;                                                                                                                                                                                                            |
| 11076429 | Linoleic acid                                 | Abortifacient Agents, Nonsteroidal; Anti-Inflammatory Agents, Non-Steroidal; Antilipemic Agents; Dermatologic Agents; Hormones and antagonists; PROSTAGLANDINS;                                                         |
| 7852642  | Phenyl mercuric acetate                       | Fungicides, Industrial;                                                                                                                                                                                                 |
| 11076713 | Zinc pyrithione                               | Anesthetics and drugs relieving fever, inflammation and pain; ANTIPYRETICS; Keratolytic Agents;                                                                                                                         |
| 7854634  | Sulfamethizole                                | Anesthetics and drugs relieving fever, inflammation and pain; Anti-Infective Agents; ANTIPYRETICS;                                                                                                                      |
| 11076571 | p-Amino benzoic acid                          | Anticonvulsants; Vitamin B Complex; Vitamins and antagonists; VITAMINS;                                                                                                                                                 |
| 11076293 | Cycloheximide                                 | Antibiotics, Antifungal; ANTIBIOTICS; ANTICONVULSANTS; Antimicrobials and chemotherapeutics; Drugs acting on the nervous system; FUNGICIDES; GABA-ANTAGONISTS; Protein Synthesis Inhibitors;                            |
| 7851637  | p-Quinone                                     | Drugs acting on the blood and cardiovascular system; Indicators and Reagents; NITRIC-OXIDE-SYNTASE-INHIBITORS;                                                                                                          |
| 11076637 | Silibinin                                     | Antioxidants; Drugs acting on the gastrointestinal system; HEPATOTROPICS; Protective Agents;                                                                                                                            |
| 7854718  | Trimethoprim                                  | Anesthetics and drugs relieving fever, inflammation and pain; Anti-Infective Agents; Anti-Infective Agents, Urinary; Antimalarials; ANTIPYRETICS; FOLATE-ANTAGONISTS; Folic Acid Antagonists; Vitamins and antagonists; |
| 11076421 | L-5-Hydroxytryptophan                         | ANTICONVULSANTS; ANTIDEPRESSANTS; Antidepressive Agents, Second-Generation; Drugs acting on the nervous system; Parasympatholytics; PSYCHOSTIMULANTS; Psychotropic agents; Serotonin Antagonists; Vasodilator Agents;   |
| 11076406 | Isoamyl nitrite                               | Vasodilator Agents;                                                                                                                                                                                                     |
| 11076332 | Diisopropyl amine                             | Drugs acting on the blood and cardiovascular system; VASODILATORS;                                                                                                                                                      |
| 7851867  | p,p'-DDT<br>(Dichlorodiphenyltrichloroethane) | CORTICOSTEROID-ANTAGONISTS; Hormones and antagonists; INSECTICIDES; Pesticides and plant hormones;                                                                                                                      |
| 11076710 | Vitamin D3                                    | ANGIOGENESIS-INHIBITORS; Anticancer drugs and carcinogens; Bone Density Conservation Agents; Vitamins and antagonists; VITAMINS-D; Vitamins;                                                                            |
| 7851899  | Diazinon                                      | ANTICHOLINESTERASES; Cholinesterase Inhibitors; Drugs acting on the nervous system; Insecticides; INSECTICIDES; Pesticides and plant hormones;                                                                          |
| 7852069  | Ethionamide                                   | Anesthetics and drugs relieving fever, inflammation and pain; ANTILEPTOTICS; Antimicrobials and chemotherapeutics; ANTIPYRETICS; Antitubercular Agents; Leprostatic Agents; TUBERCULOSTATICS;                           |
| 11076074 | 3,3',5,5'-Tetramethylbenzidine                | Chromogenic Compounds;                                                                                                                                                                                                  |
| 11076688 | trans-Retinal (Vitamin A aldehyde)            | ANGIOGENESIS-INHIBITORS; Anticancer drugs and carcinogens; Enzymes and inhibitors; ORNITHINE-DECARBOXYLASE-INHIBITORS; Vitamins and antagonists; VITAMINS;                                                              |
| 7852111  | Formulated fenaminosulf                       | Fungicides, Industrial;                                                                                                                                                                                                 |
| 11076459 | Methyl isocyanate                             | Antisickling Agents;                                                                                                                                                                                                    |

|          |                                                   |                                                                                                                                                                                                                                                                              |
|----------|---------------------------------------------------|------------------------------------------------------------------------------------------------------------------------------------------------------------------------------------------------------------------------------------------------------------------------------|
| 7851942  | Dicofol                                           | ACARICIDES; Insecticides; INSECTICIDES; Pesticides and plant hormones;                                                                                                                                                                                                       |
| 7852336  | Methyl methacrylate                               | Antimutagenic Agents; Vasodilator Agents;                                                                                                                                                                                                                                    |
| 7852412  | 1-Naphthylamine                                   | Adrenergic Agents; Adrenergic Uptake Inhibitors; ANORECTICS; Carcinogens; Central Nervous System Stimulants; Dopamine Agents; Dopamine Uptake Inhibitors; PSYCHOSTIMULANTS; PSYCHOTONICS; Psychotropic agents; Sympathomimetics;                                             |
| 7852384  | Metronidazole (Flagyl)                            | Activity terms, miscellaneous; Anesthetics and drugs relieving fever, inflammation and pain; ANTIALCOHOLICS; Anti-Infective Agents; Antimicrobials and chemotherapeutics; Antiprotozoal Agents; ANTIPYRETICS; PROTOZOACIDES; Radiation-Sensitizing Agents; RADIOSENSITIZERS; |
| 7851575  | Ampicillin trihydrate                             | Anti-Bacterial Agents; ANTIBIOTICS; Antimicrobials and chemotherapeutics;                                                                                                                                                                                                    |
| 11076165 | Abscisic acid                                     | Plant Growth Regulators;                                                                                                                                                                                                                                                     |
| 7851908  | Dibromomannitol                                   | Anticancer drugs and carcinogens; Antineoplastic Agents, Alkylating; CYTOSTATICS;                                                                                                                                                                                            |
| 7852347  | Methyl parathion                                  | ANTICHOLINESTERASES; Cholinesterase Inhibitors; Drugs acting on the nervous system; Insecticides; INSECTICIDES; Pesticides and plant hormones;                                                                                                                               |
| 7854760  | Genistein (4',5,7-Trihydroxyisoflavone)           | Anticancer drugs and carcinogens; Anticarcinogenic Agents; Antineoplastic Agents; Enzyme Inhibitors; Growth Inhibitors; TYROSINE-KINASE-INHIBITORS;                                                                                                                          |
| 7851599  | Aspartame                                         | Sweetening Agents;                                                                                                                                                                                                                                                           |
| 11076461 | Methyl salicylate                                 | Anesthetics and drugs relieving fever, inflammation and pain; ANTIHISTAMINES-H2; ANTIPYRETICS; Drugs acting on the gastrointestinal system; Fixatives;                                                                                                                       |
| 11076387 | Glutaraldehyde (Glutaric dialdehyde)              | Anesthetics and drugs relieving fever, inflammation and pain; ANTIPERSPIRANTS; ANTIPYRETICS; Cross-Linking Reagents; Disinfectants; Drugs acting on the skin; Fixatives;                                                                                                     |
| 7852145  | Hexamethyl-p-rosaniline chloride (Gentian violet) | Anesthetics and drugs relieving fever, inflammation and pain; ANTHELMINTICS; Anti-Infective Agents, Local; Antimicrobials and chemotherapeutics; ANTIPYRETICS;                                                                                                               |
| 11076358 | Ergotamine tartrate                               | Activity terms, miscellaneous; Adrenergic alpha-Agonists; Analgesics, Non-Narcotic; ANTISEROTONINS; Drugs acting on the blood and cardiovascular system; Drugs acting on the nervous system; HEMOSTATICS; UTEROTONICS; Vasoconstrictor Agents;                               |
| 7851755  | Chlorambucil                                      | Anticancer drugs and carcinogens; Antineoplastic Agents, Alkylating; CYTOSTATICS;                                                                                                                                                                                            |
| 11076518 | Ninhydrin                                         | Indicators and Reagents; Radiation-Sensitizing Agents;                                                                                                                                                                                                                       |
| 11076530 | n-Pentane                                         | Anesthetics and drugs relieving fever, inflammation and pain; GEN.ANESTHETICS;                                                                                                                                                                                               |
| 11076544 | Oleic acid                                        | Drugs acting on the blood and cardiovascular system; Sclerosing Solutions; VASOTROPICS;                                                                                                                                                                                      |
| 7852166  | Griseofulvin                                      | Antibiotics, Antifungal; ANTIBIOTICS; Antimicrobials and chemotherapeutics; FUNGICIDES;                                                                                                                                                                                      |
| 7852382  | 6-Methyl-2-thiouracil                             | Antithyroid Agents; ANTITHYROIDES; Hormones and antagonists;                                                                                                                                                                                                                 |
| 11076484 | Musk ambrette                                     | Mutagens;                                                                                                                                                                                                                                                                    |
| 7852413  | 2-Naphthylamine                                   | Carcinogens;                                                                                                                                                                                                                                                                 |
| 11076388 | Glycerol                                          | Cryoprotective Agents;                                                                                                                                                                                                                                                       |
| 11076657 | Sulfathiazole                                     | Anesthetics and drugs relieving fever, inflammation and pain;                                                                                                                                                                                                                |

|          |                                                  |                                                                                                                                                                                                                                                                                                                                                                                                                                                                                                         |
|----------|--------------------------------------------------|---------------------------------------------------------------------------------------------------------------------------------------------------------------------------------------------------------------------------------------------------------------------------------------------------------------------------------------------------------------------------------------------------------------------------------------------------------------------------------------------------------|
|          |                                                  | ANTIPYRETICS;                                                                                                                                                                                                                                                                                                                                                                                                                                                                                           |
| 7853724  | Allopurinol (4-Hydroxypyrazolo[3,4-d]pyrimidine) | Anesthetics and drugs relieving fever, inflammation and pain; ANTIGOUTS; Antimetabolites; ANTIPYRETICS; Enzyme Inhibitors; Enzymes and inhibitors; Free Radical Scavengers; Gout Suppressants; XANTHINE-OXIDASE-INHIBITORS;                                                                                                                                                                                                                                                                             |
| 7852431  | Nitrilotriacetic acid (NTA)                      | Chelating Agents;                                                                                                                                                                                                                                                                                                                                                                                                                                                                                       |
| 7851701  | n-Butyl-p-hydroxybenzoate                        | Anesthetics and drugs relieving fever, inflammation and pain; ANTIPYRETICS;                                                                                                                                                                                                                                                                                                                                                                                                                             |
| 7852598  | Pentachlorophenol                                | Antimicrobials and chemotherapeutics; Environmental Pollutants; Enzyme Inhibitors; FUNGICIDES; Herbicides; Insecticides; Pesticides; Poisons; Uncoupling Agents;                                                                                                                                                                                                                                                                                                                                        |
| 7854640  | Sulfanilamide                                    | Anesthetics and drugs relieving fever, inflammation and pain; Anti-Bacterial Agents; ANTIPYRETICS;                                                                                                                                                                                                                                                                                                                                                                                                      |
| 7852618  | Phenothiazine                                    | Activity terms, miscellaneous; ANTHELMINTICS; Antimicrobials and chemotherapeutics; ANTIOXIDANTS; Antiprotozoal Agents;                                                                                                                                                                                                                                                                                                                                                                                 |
| 7854737  | Valproic acid                                    | Anticonvulsants; ANTICONVULSANTS; Antimanic Agents; ANTIMANICS; Drugs acting on the nervous system; Enzyme Inhibitors; GABA Agents; Psychotropic agents;                                                                                                                                                                                                                                                                                                                                                |
| 7854832  | n-Butyl-p-aminobenzoate                          | Anesthetics, Local; Anticancer drugs and carcinogens; Cholinergic Agents; CYTOSTATICS; Drugs acting on the nervous system; Indicators and Reagents; PARASYMPATHOMIMETICS; Uncoupling Agents; Vasodilator Agents;                                                                                                                                                                                                                                                                                        |
| 11076123 | 4-Androstene-3,17-dione                          | ANDROGENS; Hormones and antagonists;                                                                                                                                                                                                                                                                                                                                                                                                                                                                    |
| 7852851  | Tolbutamide                                      | ANTIDIABETICS; Hormones and antagonists; Hypoglycemic Agents;                                                                                                                                                                                                                                                                                                                                                                                                                                           |
| 7852782  | Sulfamethazine                                   | Anesthetics and drugs relieving fever, inflammation and pain; Anti-Infective Agents; ANTIPYRETICS;                                                                                                                                                                                                                                                                                                                                                                                                      |
| 7854834  | 4,4'-Methylenedianiline                          | Carcinogens;                                                                                                                                                                                                                                                                                                                                                                                                                                                                                            |
| 11076025 | 2-Aminothiazole                                  | ANTITHYROIDS; Hormones and antagonists;                                                                                                                                                                                                                                                                                                                                                                                                                                                                 |
| 11076644 | Sodium dodecyl sulfate                           | Surface-Active Agents;                                                                                                                                                                                                                                                                                                                                                                                                                                                                                  |
| 7852784  | Sulfisoxazole                                    | Anti-Infective Agents;                                                                                                                                                                                                                                                                                                                                                                                                                                                                                  |
| 7853207  | Methanol                                         | Solvents;                                                                                                                                                                                                                                                                                                                                                                                                                                                                                               |
| 7852284  | Maleic hydrazide                                 | Herbicides; Plant Growth Regulators;                                                                                                                                                                                                                                                                                                                                                                                                                                                                    |
| 7852170  | Hematoxylin (C.I. 75290)                         | Antimicrobials and chemotherapeutics; Coloring Agents; VIRUCIDES;                                                                                                                                                                                                                                                                                                                                                                                                                                       |
| 7851586  | o-Anthranilic acid                               | Anticonvulsants; Vitamin B Complex; Vitamins and antagonists; VITAMINS;                                                                                                                                                                                                                                                                                                                                                                                                                                 |
| 7852974  | Acetone                                          | Solvents;                                                                                                                                                                                                                                                                                                                                                                                                                                                                                               |
| 11076173 | Acetylsalicylic acid                             | Analgesics; ANALGESICS; Anesthetics and drugs relieving fever, inflammation and pain; ANTIAGGREGANTS; ANTIHISTAMINES-H2; Anti-Inflammatory Agents, Non-Steroidal; ANTIPYRETICS; CYCLOOXYGENASE-1-INHIBITORS; Cyclooxygenase Inhibitors; CYCLOOXYGENASE-INHIBITORS; Drugs acting on the blood and cardiovascular system; Drugs acting on the gastrointestinal system; Enzymes and inhibitors; Fibrinolytic Agents; Hormones and antagonists; Platelet Aggregation Inhibitors; PROSTAGLANDIN-ANTAGONISTS; |
| 7851561  | o-Aminoazotoluene                                | Coloring Agents;                                                                                                                                                                                                                                                                                                                                                                                                                                                                                        |
| 11076697 | Tris(2,3-epoxypropyl)isocyanurate                | Anticancer drugs and carcinogens; Antineoplastic Agents; CYTOSTATICS;                                                                                                                                                                                                                                                                                                                                                                                                                                   |

|          |                  |                                                                                                                                                                                                                                                                                                                                                                                                                                                                                                                                                                                                                                                                                                                                                                                                                                                                                                                                                                                                                                                                                                                                                                                                                                                                                                                                                                                                                                                                                                                                                                                                                                                                                                                                                                                                                                                                                                                                                                                                                                                                                                                                                                                                                                                           |
|----------|------------------|-----------------------------------------------------------------------------------------------------------------------------------------------------------------------------------------------------------------------------------------------------------------------------------------------------------------------------------------------------------------------------------------------------------------------------------------------------------------------------------------------------------------------------------------------------------------------------------------------------------------------------------------------------------------------------------------------------------------------------------------------------------------------------------------------------------------------------------------------------------------------------------------------------------------------------------------------------------------------------------------------------------------------------------------------------------------------------------------------------------------------------------------------------------------------------------------------------------------------------------------------------------------------------------------------------------------------------------------------------------------------------------------------------------------------------------------------------------------------------------------------------------------------------------------------------------------------------------------------------------------------------------------------------------------------------------------------------------------------------------------------------------------------------------------------------------------------------------------------------------------------------------------------------------------------------------------------------------------------------------------------------------------------------------------------------------------------------------------------------------------------------------------------------------------------------------------------------------------------------------------------------------|
|          |                  | Activity terms, miscellaneous; Adrenergic alpha-Antagonists; Adrenergic Uptake Inhibitors; ANALGESICS; Analgesics, Non-Narcotic; Anesthetics and drugs relieving fever, inflammation and pain; Anthelmintics; ANTHELMINTICS; ANTIARRHYTHMICS; Anticancer drugs and carcinogens; Anticoagulants; ANTIDEPRESSANTS; Antidepressive Agents; Antidepressive Agents, Tricyclic; ANTIDIABETICS; ANTIEMETICS; Antifungal Agents; ANTIHISTAMINES-H1; ANTIHISTAMINES-H2; Antihypertensive Agents; Anti-Infective Agents; Anti-Inflammatory Agents, Non-Steroidal; Antimalarials; Antimanic Agents; Antimicrobials and chemotherapeutics; Antinematodal Agents; Antiparkinson Agents; Antipruritics; ANTIPYRETICS; ANTISEROTONINS; Antithyroid Agents; Biocompatible Materials; Buffers; CALCIUM-ANTAGONISTS; Calcium Channel Blockers; Cardiovascular Agents; Cathartics; Chelating Agents; CHELATORS; Coloring Agents; CYCLOOXYGENASE-1-INHIBITORS; CYCLOOXYGENASE-2-INHIBITORS; Cyclooxygenase Inhibitors; CYCLOOXYGENASE-INHIBITORS; DIAGNOSTICS; Diuretics; Dopamine Agonists; DOPAMINERGICS; Drugs acting on the blood and cardiovascular system; Drugs acting on the gastrointestinal system; Drugs acting on the nervous system; Drugs acting on the skin; Enzyme Inhibitors; Enzymes and inhibitors; Estradiol Antagonists; Estrogen Antagonists; ESTROGEN-ANTAGONISTS; Expectorants; Fertility Agents, Female; Fixatives; Folic Acid Antagonists; Food Additives; FUNGICIDES; Fungicides, Industrial; Gastrointestinal Agents; Gout Suppressants; Histamine Agonists; Histamine H1 Antagonists; Hormones and antagonists; HYPOTENSIVES; IMMUNOSTIMULANTS; IMMUNOSUPPRESSIVES; Indicators and Reagents; Keratolytic Agents; KERATOLYTICS; Lipotropic Agents; Mutagens; Neuromuscular Depolarizing Agents; Nootropic Agents; PARASYMPATHOMIMETICS; PENETRATION-ENHANCERS; Progestins; PROGESTOGENS; PROSTAGLANDIN-ANTAGONISTS; PROTOZOACIDES; PSYCHOSEDATIVES; PSYCHOSTIMULANTS; Psychotropic agents; Radiation-Protective Agents; Radiopharmaceuticals; Selective Estrogen Receptor Modulators; Serotonin Agonists; SYMPATHOLYTICS-ALPHA; THROMBOXANE-ANTAGONISTS; Tocolytic Agents; TRANQUILIZERS; Vasodilator Agents; Vitamins and antagonists; VITAMINS; |
| 7853009  | Fumaric acid     |                                                                                                                                                                                                                                                                                                                                                                                                                                                                                                                                                                                                                                                                                                                                                                                                                                                                                                                                                                                                                                                                                                                                                                                                                                                                                                                                                                                                                                                                                                                                                                                                                                                                                                                                                                                                                                                                                                                                                                                                                                                                                                                                                                                                                                                           |
| 7851803  | Monuron          | HERBICIDES; Pesticides and plant hormones;                                                                                                                                                                                                                                                                                                                                                                                                                                                                                                                                                                                                                                                                                                                                                                                                                                                                                                                                                                                                                                                                                                                                                                                                                                                                                                                                                                                                                                                                                                                                                                                                                                                                                                                                                                                                                                                                                                                                                                                                                                                                                                                                                                                                                |
| 7852182  | Hexachlorophene  | Anesthetics and drugs relieving fever, inflammation and pain; ANTHELMINTICS; Antihypertensive Agents; Anti-Infective Agents, Local; Antimicrobials and chemotherapeutics; ANTIPYRETICS; Drugs acting on the blood and cardiovascular system; HYPOTENSIVES; Vasodilator Agents;                                                                                                                                                                                                                                                                                                                                                                                                                                                                                                                                                                                                                                                                                                                                                                                                                                                                                                                                                                                                                                                                                                                                                                                                                                                                                                                                                                                                                                                                                                                                                                                                                                                                                                                                                                                                                                                                                                                                                                            |
| 11076194 | Amiloride HCl    | Activity terms, miscellaneous; Diuretics; DIURETICS; Enzymes and inhibitors; PROTEIN-KINASE-C-INHIBITORS; Sodium Channel Blockers;                                                                                                                                                                                                                                                                                                                                                                                                                                                                                                                                                                                                                                                                                                                                                                                                                                                                                                                                                                                                                                                                                                                                                                                                                                                                                                                                                                                                                                                                                                                                                                                                                                                                                                                                                                                                                                                                                                                                                                                                                                                                                                                        |
| 7852840  | Thiourea         | Indicators and Reagents;                                                                                                                                                                                                                                                                                                                                                                                                                                                                                                                                                                                                                                                                                                                                                                                                                                                                                                                                                                                                                                                                                                                                                                                                                                                                                                                                                                                                                                                                                                                                                                                                                                                                                                                                                                                                                                                                                                                                                                                                                                                                                                                                                                                                                                  |
| 11076557 | o-Phenanthroline | Chelating Agents; Cholinesterase Inhibitors; Cross-Linking Reagents; Intercalating Agents; Iron Chelating Agents; Protease Inhibitors;                                                                                                                                                                                                                                                                                                                                                                                                                                                                                                                                                                                                                                                                                                                                                                                                                                                                                                                                                                                                                                                                                                                                                                                                                                                                                                                                                                                                                                                                                                                                                                                                                                                                                                                                                                                                                                                                                                                                                                                                                                                                                                                    |

|          |                                 |                                                                                                                                                                                                                                                                                                                                                                                                                                          |
|----------|---------------------------------|------------------------------------------------------------------------------------------------------------------------------------------------------------------------------------------------------------------------------------------------------------------------------------------------------------------------------------------------------------------------------------------------------------------------------------------|
| 7852875  | Trichloroethylene               | ANALGESICS; Anesthetics and drugs relieving fever, inflammation and pain; Anesthetics, Inhalation; GEN.ANESTHETICS; Solvents;                                                                                                                                                                                                                                                                                                            |
| 7851785  | Chloroacetophenone              | Irritants; Tear Gases;                                                                                                                                                                                                                                                                                                                                                                                                                   |
| 11076596 | p-Hexylresorcinol               | Anesthetics and drugs relieving fever, inflammation and pain; ANTHELMINTICS; Anti-Infective Agents, Local; Antimicrobials and chemotherapeutics; Antinematodal Agents; Antiplatyhelminthic Agents; ANTIPYRETICS;                                                                                                                                                                                                                         |
| 11076418 | Isoproterenol HCl               | Adrenergic beta-Agonists; Bronchodilator Agents; Cardiotonic Agents; Sympathomimetics;                                                                                                                                                                                                                                                                                                                                                   |
| 11076317 | Dichlorvos (Vapona)             | Anthelmintics; ANTHELMINTICS; Antimicrobials and chemotherapeutics; Cholinesterase Inhibitors; Insecticides; INSECTICIDES; Pesticides and plant hormones;                                                                                                                                                                                                                                                                                |
| 7853401  | N,N-Diethyl-m-toluamide (DEET)  | Insect Repellents;                                                                                                                                                                                                                                                                                                                                                                                                                       |
| 7852709  | Pyrimethamine                   | Antimalarials; Antimicrobials and chemotherapeutics; Antiprotozoal Agents; FOLATE-ANTAGONISTS; Folic Acid Antagonists; PROTOZOACIDES; Vitamins and antagonists;                                                                                                                                                                                                                                                                          |
| 11076433 | Maltol                          | Activity terms, miscellaneous; CHELATORS;                                                                                                                                                                                                                                                                                                                                                                                                |
| 11076393 | Halazone                        | Anesthetics and drugs relieving fever, inflammation and pain; ANTIPYRETICS;                                                                                                                                                                                                                                                                                                                                                              |
| 7851499  | Acetohexamide                   | ANTIDIABETICS; Hormones and antagonists; Hypoglycemic Agents;                                                                                                                                                                                                                                                                                                                                                                            |
| 7854576  | Quinidine                       | Adrenergic alpha-Antagonists; Analgesics, Non-Narcotic; Anesthetics and drugs relieving fever, inflammation and pain; Anti-Arrhythmia Agents; ANTIARRHYTHMICS; Anticancer drugs and carcinogens; Antimalarials; Antimicrobials and chemotherapeutics; ANTIPYRETICS; Drugs acting on the blood and cardiovascular system; Enzyme Inhibitors; Muscarinic Antagonists; Muscle Relaxants, Central; P-GLYCOPROTEIN-INHIBITORS; PROTOZOACIDES; |
| 7851740  | Carbazole                       | Carcinogens;                                                                                                                                                                                                                                                                                                                                                                                                                             |
| 7851606  | Auramine                        | Anti-Infective Agents; Coloring Agents; Disinfectants;                                                                                                                                                                                                                                                                                                                                                                                   |
| 7851638  | 2,2'-Dithiobisbenzothiazole     | Antifungal Agents; Antimicrobials and chemotherapeutics; FUNGICIDES;                                                                                                                                                                                                                                                                                                                                                                     |
| 11076495 | N,N-Dimethyl-p-phenylenediamine | Fluorescent Dyes;                                                                                                                                                                                                                                                                                                                                                                                                                        |
| 11076444 | Medroxyprogesterone acetate     | Antineoplastic Agents, Hormonal; Contraceptive Agents, Female; Contraceptive Agents, Male; Contraceptives, Oral, Synthetic; Hormones and antagonists; PROGESTOGENS;                                                                                                                                                                                                                                                                      |
| 11076673 | Tetrachloroethylene             | ANTHELMINTICS; Antimicrobials and chemotherapeutics; Carcinogens; Environmental Pollutants; Solvents;                                                                                                                                                                                                                                                                                                                                    |
| 7852729  | Reserpine                       | Adrenergic Uptake Inhibitors; Anticancer drugs and carcinogens; Antihypertensive Agents; Antipsychotic Agents; DOPAMINE-ANTAGONISTS; Drugs acting on the blood and cardiovascular system; Drugs acting on the nervous system; HYPOTENSIVES; NEUROLEPTICS; P-GLYCOPROTEIN-INHIBITORS; PSYCHOSEDATIVES; Psychotropic agents; TRANQUILIZERS;                                                                                                |
| 11076204 | Azoxybenzene                    | ANTIHISTAMINES-H2; Drugs acting on the gastrointestinal system;                                                                                                                                                                                                                                                                                                                                                                          |
| 7851758  | Chloranil                       | Antimicrobials and chemotherapeutics; ANTIPSORIATICS; Drugs acting on the skin; FUNGICIDES; Fungicides, Industrial;                                                                                                                                                                                                                                                                                                                      |
| 11076211 | Benzimidazole                   | Anthelmintics;                                                                                                                                                                                                                                                                                                                                                                                                                           |
| 7851749  | Catechol (1,2-Benzenediol)      | Anticancer drugs and carcinogens; Anticarcinogenic Agents;                                                                                                                                                                                                                                                                                                                                                                               |

|          |                                                  |                                                                                                                                                                                                                                                                                                                                                                                                                                                                                                                                                                                                                                                                                                                                                                                                                                                                                                                                                                                                                                                                                                             |
|----------|--------------------------------------------------|-------------------------------------------------------------------------------------------------------------------------------------------------------------------------------------------------------------------------------------------------------------------------------------------------------------------------------------------------------------------------------------------------------------------------------------------------------------------------------------------------------------------------------------------------------------------------------------------------------------------------------------------------------------------------------------------------------------------------------------------------------------------------------------------------------------------------------------------------------------------------------------------------------------------------------------------------------------------------------------------------------------------------------------------------------------------------------------------------------------|
|          |                                                  | Anti-Inflammatory Agents, Non-Steroidal; Antimutagenic Agents; Antioxidants; BIOFLAVONOIDS; Drugs acting on the gastrointestinal system; HEPATOTROPICS; IMMUNOSTIMULANTS; Neuroprotective Agents; Protease Inhibitors; Radiation-Protective Agents; Vitamins and antagonists; VITAMINS;                                                                                                                                                                                                                                                                                                                                                                                                                                                                                                                                                                                                                                                                                                                                                                                                                     |
| 7852589  | Oxytetracycline HCl                              | Anti-Bacterial Agents; ANTIBIOTICS; Antimicrobials and chemotherapeutics;                                                                                                                                                                                                                                                                                                                                                                                                                                                                                                                                                                                                                                                                                                                                                                                                                                                                                                                                                                                                                                   |
| 7852628  | Phenyl butazone                                  | Anesthetics and drugs relieving fever, inflammation and pain; ANTIHISTAMINES-H2; Anti-Inflammatory Agents, Non-Steroidal; ANTIPYRETICS; Drugs acting on the gastrointestinal system; Hormones and antagonists; PROSTAGLANDIN-ANTAGONISTS;                                                                                                                                                                                                                                                                                                                                                                                                                                                                                                                                                                                                                                                                                                                                                                                                                                                                   |
| 7853105  | m-Toluic acid                                    | Antifungal Agents; Anti-Infective Agents; Antimetabolites, Antineoplastic; Food Preservatives;                                                                                                                                                                                                                                                                                                                                                                                                                                                                                                                                                                                                                                                                                                                                                                                                                                                                                                                                                                                                              |
| 7852271  | Lithocholic acid                                 | Detergents;                                                                                                                                                                                                                                                                                                                                                                                                                                                                                                                                                                                                                                                                                                                                                                                                                                                                                                                                                                                                                                                                                                 |
| 7851931  | 2,4-Dichlorophenol                               | Anthelmintics;                                                                                                                                                                                                                                                                                                                                                                                                                                                                                                                                                                                                                                                                                                                                                                                                                                                                                                                                                                                                                                                                                              |
| 7851862  | Succinic acid-2,2-dimethylhydrazide (Daminozide) | Herbicides; Plant Growth Regulators;                                                                                                                                                                                                                                                                                                                                                                                                                                                                                                                                                                                                                                                                                                                                                                                                                                                                                                                                                                                                                                                                        |
| 11075889 | 1,2,3,4-Tetrahydroisoquinoline                   | ANTIPSORIATICS; Drugs acting on the skin;                                                                                                                                                                                                                                                                                                                                                                                                                                                                                                                                                                                                                                                                                                                                                                                                                                                                                                                                                                                                                                                                   |
| 7852867  | Tricaprylin                                      | Excipients;                                                                                                                                                                                                                                                                                                                                                                                                                                                                                                                                                                                                                                                                                                                                                                                                                                                                                                                                                                                                                                                                                                 |
| 7852409  | N-(1-Naphthyl)ethylenediamine 2HCl               | ANTHELMINTICS; Antimicrobials and chemotherapeutics; Cholinesterase Inhibitors; Insecticides; INSECTICIDES; Pesticides and plant hormones;                                                                                                                                                                                                                                                                                                                                                                                                                                                                                                                                                                                                                                                                                                                                                                                                                                                                                                                                                                  |
| 7853235  | Riboflavin                                       | Photosensitizing Agents; Vitamin B Complex; Vitamins and antagonists; VITAMINS-B2;                                                                                                                                                                                                                                                                                                                                                                                                                                                                                                                                                                                                                                                                                                                                                                                                                                                                                                                                                                                                                          |
| 11076233 | Bisphenol A                                      | Air Pollutants, Occupational; Estrogens, Non-Steroidal; Free Radical Scavengers;                                                                                                                                                                                                                                                                                                                                                                                                                                                                                                                                                                                                                                                                                                                                                                                                                                                                                                                                                                                                                            |
| 7851582  | Aniline                                          | Carcinogens; Indicators and Reagents;                                                                                                                                                                                                                                                                                                                                                                                                                                                                                                                                                                                                                                                                                                                                                                                                                                                                                                                                                                                                                                                                       |
| 11076694 | Trifluralin                                      | Herbicides; HERBICIDES; Pesticides and plant hormones; Tubulin Modulators;                                                                                                                                                                                                                                                                                                                                                                                                                                                                                                                                                                                                                                                                                                                                                                                                                                                                                                                                                                                                                                  |
| 11076685 | Toluene                                          | Solvents;                                                                                                                                                                                                                                                                                                                                                                                                                                                                                                                                                                                                                                                                                                                                                                                                                                                                                                                                                                                                                                                                                                   |
| 7852597  | Pentachloronitrobenzene                          | Antimicrobials and chemotherapeutics; Fungicides, Industrial; FUNGICIDES;                                                                                                                                                                                                                                                                                                                                                                                                                                                                                                                                                                                                                                                                                                                                                                                                                                                                                                                                                                                                                                   |
| 7852739  | Basic red 9 (p-Rosaniline HCl) (C.I. 42500)      | Activity terms, miscellaneous; Adrenergic alpha-Antagonists; Adrenergic Uptake Inhibitors; ANALGESICS; Analgesics, Non-Narcotic; Anesthetics and drugs relieving fever, inflammation and pain; Anthelmintics; ANTHELMINTICS; ANTIARRHYTHMICS; Anticancer drugs and carcinogens; Anticoagulants; ANTIDEPRESSANTS; Antidepressive Agents; Antidepressive Agents, Tricyclic; ANTIDIABETICS; ANTIEMETICS; Antifungal Agents; ANTIHISTAMINES-H1; ANTIHISTAMINES-H2; Antihypertensive Agents; Anti-Infective Agents; Anti-Inflammatory Agents, Non-Steroidal; Antimalarials; Antimanic Agents; Antimicrobials and chemotherapeutics; Antinematodal Agents; Antiparkinson Agents; Antipruritics; ANTIPYRETICS; ANTISEROTONINS; Antithyroid Agents; Biocompatible Materials; Buffers; CALCIUM-ANTAGONISTS; Calcium Channel Blockers; Cardiovascular Agents; Cathartics; Chelating Agents; CHELATORS; Coloring Agents; CYCLOOXYGENASE-1-INHIBITORS; CYCLOOXYGENASE-2-INHIBITORS; Cyclooxygenase Inhibitors; CYCLOOXYGENASE-INHIBITORS; DIAGNOSTICS; Diuretics; Dopamine Agonists; DOPAMINERGICS; Drugs acting on the |

|          |                                    |                                                                                                                                                                                                                                                                                                                                                                                                                                                                                                                                                                                                                                                                                                                                                                                                                                                                                                                                                                                                                                                                                                                                               |
|----------|------------------------------------|-----------------------------------------------------------------------------------------------------------------------------------------------------------------------------------------------------------------------------------------------------------------------------------------------------------------------------------------------------------------------------------------------------------------------------------------------------------------------------------------------------------------------------------------------------------------------------------------------------------------------------------------------------------------------------------------------------------------------------------------------------------------------------------------------------------------------------------------------------------------------------------------------------------------------------------------------------------------------------------------------------------------------------------------------------------------------------------------------------------------------------------------------|
|          |                                    | blood and cardiovascular system; Drugs acting on the gastrointestinal system; Drugs acting on the nervous system; Drugs acting on the skin; Enzyme Inhibitors; Enzymes and inhibitors; Estradiol Antagonists; Estrogen Antagonists; ESTROGEN-ANTAGONISTS; Expectorants; Fertility Agents, Female; Fixatives; Folic Acid Antagonists; Food Additives; FUNGICIDES; Fungicides, Industrial; Gastrointestinal Agents; Gout Suppressants; Histamine Agonists; Histamine H1 Antagonists; Hormones and antagonists; HYPOTENSIVES; IMMUNOSTIMULANTS; IMMUNOSUPPRESSIVES; Indicators and Reagents; Keratolytic Agents; KERATOLYTICS; Lipotropic Agents; Mutagens; Neuromuscular Depolarizing Agents; Nootropic Agents; PARASYMPATHOMIMETICS; PENETRATION-ENHANCERS; Progestins; PROGESTOGENS; PROSTAGLANDIN-ANTAGONISTS; PROTOZOACIDES; PSYCHOSEDATIVES; PSYCHOSTIMULANTS; Psychotropic agents; Radiation-Protective Agents; Radiopharmaceuticals; Selective Estrogen Receptor Modulators; Serotonin Agonists; SYMPATHOLYTICS-ALPHA; THROMBOXANE-ANTAGONISTS; Tocolytic Agents; TRANQUILIZERS; Vasodilator Agents; Vitamins and antagonists; VITAMINS; |
| 7852175  | Hexachloro-1,3-butadiene           | Fungicides, Industrial;                                                                                                                                                                                                                                                                                                                                                                                                                                                                                                                                                                                                                                                                                                                                                                                                                                                                                                                                                                                                                                                                                                                       |
| 7851813  | Chlorpheniramine maleate           | Activity terms, miscellaneous; Anti-Allergic Agents; ANTIHISTAMINES-H1; Antipruritics; Histamine H1 Antagonists;                                                                                                                                                                                                                                                                                                                                                                                                                                                                                                                                                                                                                                                                                                                                                                                                                                                                                                                                                                                                                              |
| 7852866  | Bromoform                          | Carcinogens; Psychotropic agents; SEDATIVES; Teratogens;                                                                                                                                                                                                                                                                                                                                                                                                                                                                                                                                                                                                                                                                                                                                                                                                                                                                                                                                                                                                                                                                                      |
| 11076600 | Picloram                           | Herbicides;                                                                                                                                                                                                                                                                                                                                                                                                                                                                                                                                                                                                                                                                                                                                                                                                                                                                                                                                                                                                                                                                                                                                   |
| 7853044  | Decanoic acid                      | Antifungal Agents;                                                                                                                                                                                                                                                                                                                                                                                                                                                                                                                                                                                                                                                                                                                                                                                                                                                                                                                                                                                                                                                                                                                            |
| 7853270  | 2,2'-Methylenebis-(4-chlorophenol) | Anesthetics and drugs relieving fever, inflammation and pain; ANTHELMINTICS; Anticestodal Agents; Antifungal Agents; Antimicrobials and chemotherapeutics; Antiprotozoal Agents; ANTIPYRETICS; FUNGICIDES;                                                                                                                                                                                                                                                                                                                                                                                                                                                                                                                                                                                                                                                                                                                                                                                                                                                                                                                                    |
| 7853698  | Acetanilide                        | ANALGESICS; Anesthetics and drugs relieving fever, inflammation and pain; Antihypertensive Agents; ANTIPYRETICS; Drugs acting on the blood and cardiovascular system; Herbicides; HERBICIDES; HYPOTENSIVES; Pesticides and plant hormones;                                                                                                                                                                                                                                                                                                                                                                                                                                                                                                                                                                                                                                                                                                                                                                                                                                                                                                    |
| 11076531 | N-Phenyl-1-naphthylamine           | Carcinogens; Fluorescent Dyes;                                                                                                                                                                                                                                                                                                                                                                                                                                                                                                                                                                                                                                                                                                                                                                                                                                                                                                                                                                                                                                                                                                                |
| 7852139  | Furfural                           | Antimicrobials and chemotherapeutics; FUNGICIDES;                                                                                                                                                                                                                                                                                                                                                                                                                                                                                                                                                                                                                                                                                                                                                                                                                                                                                                                                                                                                                                                                                             |
| 7852828  | Theophylline                       | Activity terms, miscellaneous; ANTIASTHMATICS; Bronchodilator Agents; BRONCHODILATORS; CALCIUM-ANTAGONISTS; CARBONIC-ANHYDRASE-INHIBITORS; Cardiogenic Agents; DIURETICS; Drugs acting on the blood and cardiovascular system; Drugs acting on the respiratory system; Enzymes and inhibitors; Phosphodiesterase Inhibitors; Vasodilator Agents; VASODILATORS;                                                                                                                                                                                                                                                                                                                                                                                                                                                                                                                                                                                                                                                                                                                                                                                |
| 11076200 | Anthralin                          | Anesthetics and drugs relieving fever, inflammation and pain; ANTIPSORIATICS; ANTIPYRETICS; Dermatologic Agents; Drugs acting on the skin;                                                                                                                                                                                                                                                                                                                                                                                                                                                                                                                                                                                                                                                                                                                                                                                                                                                                                                                                                                                                    |
| 11076234 | Bisphenol A diglycidyl ether       | Carcinogens;                                                                                                                                                                                                                                                                                                                                                                                                                                                                                                                                                                                                                                                                                                                                                                                                                                                                                                                                                                                                                                                                                                                                  |
| 7852791  | Chlorotrianisene                   | Antineoplastic Agents, Hormonal; ESTROGENS; Estrogens, Non-Steroidal; Hormones and antagonists;                                                                                                                                                                                                                                                                                                                                                                                                                                                                                                                                                                                                                                                                                                                                                                                                                                                                                                                                                                                                                                               |
| 7852610  | Phenazopyridine HCl                | Anesthetics and drugs relieving fever, inflammation and pain; Anesthetics, Local; ANTIPYRETICS;                                                                                                                                                                                                                                                                                                                                                                                                                                                                                                                                                                                                                                                                                                                                                                                                                                                                                                                                                                                                                                               |

|          |                                |                                                                                                                                                                                                                                                   |
|----------|--------------------------------|---------------------------------------------------------------------------------------------------------------------------------------------------------------------------------------------------------------------------------------------------|
| 7853199  | p-Chloro-m-cresol              | Anesthetics and drugs relieving fever, inflammation and pain; ANTIPYRETICS; Fungicides, Industrial;                                                                                                                                               |
| 7851735  | Captan                         | Anesthetics and drugs relieving fever, inflammation and pain; Antimicrobials and chemotherapeutics; ANTIPYRETICS; FUNGICIDES; Fungicides, Industrial;                                                                                             |
| 11076259 | Castor oil                     | Cathartics;                                                                                                                                                                                                                                       |
| 7852126  | 5-Fluorouracil                 | Anticancer drugs and carcinogens; Antimetabolites; Antimetabolites, Antineoplastic; CYTOSTATICS; Enzymes and inhibitors; Immunosuppressive Agents; THYMIDYLATE-SYNTHASE-INHIBITORS;                                                               |
| 7852520  | N-Nitrosodiethylamine          | Alkylating Agents;                                                                                                                                                                                                                                |
| 7851814  | Chlorpropamide                 | ANTIDIABETICS; Hormones and antagonists; Hypoglycemic Agents;                                                                                                                                                                                     |
| 7851945  | Dieldrin                       | Insecticides; INSECTICIDES; Pesticides and plant hormones;                                                                                                                                                                                        |
| 11076561 | Orotic acid                    | Drugs acting on the gastrointestinal system; HEPATOTROPICS;                                                                                                                                                                                       |
| 7852613  | Phenformin HCl                 | ANTIDIABETICS; Hormones and antagonists; Hypoglycemic Agents;                                                                                                                                                                                     |
| 7851820  | Danthron                       | Cathartics; Drugs acting on the gastrointestinal system; LAXATIVES; Mutagens;                                                                                                                                                                     |
| 7852622  | 1-Phenyl-3-methyl-5-pyrazolone | Free Radical Scavengers;                                                                                                                                                                                                                          |
| 11076564 | o-Toluidine                    | Carcinogens; Indicators and Reagents;                                                                                                                                                                                                             |
| 11076584 | Pentachlorobenzene             | Fungicides, Industrial; Insecticides;                                                                                                                                                                                                             |
| 7851563  | 4-Aminobiphenyl                | Carcinogens;                                                                                                                                                                                                                                      |
| 7851864  | o,p'-DDD                       | Antineoplastic Agents, Hormonal; CORTICOSTEROID-ANTAGONISTS; Hormones and antagonists; INSECTICIDES; Pesticides and plant hormones;                                                                                                               |
| 11075981 | 2,4-Dichloroaniline            | Carcinogens; Indicators and Reagents;                                                                                                                                                                                                             |
| 7852608  | p-Acetophenetidide             | Analgesics, Non-Narcotic; ANALGESICS; Anesthetics and drugs relieving fever, inflammation and pain; ANTIPYRETICS; Enzyme Inhibitors;                                                                                                              |
| 7852181  | Hexachloroethane               | Anthelmintics; ANTHELMINTICS; Antimicrobials and chemotherapeutics;                                                                                                                                                                               |
| 11076279 | Colchicine                     | Activity terms, miscellaneous; Anesthetics and drugs relieving fever, inflammation and pain; Anticancer drugs and carcinogens; ANTIPYRETICS; CYTOSTATICS; Gout Suppressants; P-GLYCOPROTEIN-INHIBITORS; SELECTIN-ANTAGONISTS; Tubulin Modulators; |
| 11076605 | p-Nitroacetophenone            | Radiation-Sensitizing Agents;                                                                                                                                                                                                                     |
| 7852956  | Ziram                          | Antimicrobials and chemotherapeutics; Fungicides, Industrial; FUNGICIDES;                                                                                                                                                                         |
| 7852120  | Fluometuron                    | HERBICIDES; Pesticides and plant hormones;                                                                                                                                                                                                        |
| 7852552  | N-Nitrosopiperidine            | Carcinogens; Mutagens;                                                                                                                                                                                                                            |
| 11076360 | Ethidium bromide               | Anticancer drugs and carcinogens; Antimicrobials and chemotherapeutics; DNA-INTERCALATORS; Enzyme Inhibitors; Fluorescent Dyes; Indicators and Reagents; Nicotinic Antagonists; PROTOZOACIDES; Trypanocidal Agents;                               |
| 7852235  | Iodoform                       | Anesthetics and drugs relieving fever, inflammation and pain; ANTIPYRETICS;                                                                                                                                                                       |
| 7852320  | Hydroquinone monomethyl ether  | Activity terms, miscellaneous; Anticancer drugs and carcinogens; Antineoplastic Agents; Antioxidants; ANTIOXIDANTS; Carcinogens; CYTOSTATICS;                                                                                                     |
| 11076091 | 3,4-Xylidine                   | Herbicides;                                                                                                                                                                                                                                       |



|          |                               |                                                                                                                                                                                                                                                                                                             |
|----------|-------------------------------|-------------------------------------------------------------------------------------------------------------------------------------------------------------------------------------------------------------------------------------------------------------------------------------------------------------|
| 7853276  | N,N-dimethyl-p-toluidine      | Fluorescent Dyes;                                                                                                                                                                                                                                                                                           |
| 11076183 | Allylthiourea                 | Anesthetics and drugs relieving fever, inflammation and pain; ANTIPIRETICS;                                                                                                                                                                                                                                 |
| 11076683 | Thiophanate, methyl ester     | Anthelmintics; ANTHELMINTICS; Antimicrobials and chemotherapeutics; Antinematodal Agents; Fungicides, Industrial; FUNGICIDES;                                                                                                                                                                               |
| 11075986 | 2,4-Dihydroxybenzoic acid     | Antifungal Agents; Anti-Infective Agents; Antimetabolites, Antineoplastic; Food Preservatives;                                                                                                                                                                                                              |
| 7853204  | 2-Hydroxybenzamide            | ANALGESICS; Anesthetics and drugs relieving fever, inflammation and pain; ANTIPIRETICS;                                                                                                                                                                                                                     |
| 7853486  | N-Acetyl-m-Aminophenol        | Analgesics; ANALGESICS; Anesthetics and drugs relieving fever, inflammation and pain;                                                                                                                                                                                                                       |
| 7852378  | Methylphenidate Hydrochloride | Adrenergic Agents; Adrenergic Uptake Inhibitors; Central Nervous System Stimulants; Dopamine Agents; Dopamine Uptake Inhibitors; PSYCHOSTIMULANTS; PSYCHOTONICS; Psychotropic agents; Sympathomimetics;                                                                                                     |
| 7851627  | Benzene                       | Insecticides; INSECTICIDES; Pesticides and plant hormones;                                                                                                                                                                                                                                                  |
| 7852096  | 4-Vinylcyclohexene Dioxide    | Carcinogens;                                                                                                                                                                                                                                                                                                |
| 11076565 | Oxymetholone                  | Anabolic Agents; ANABOLICS; Androgens; ANDROGENS; Hormones and antagonists;                                                                                                                                                                                                                                 |
| 7852957  | Zineb                         | Antimicrobials and chemotherapeutics; Fungicides, Industrial; FUNGICIDES;                                                                                                                                                                                                                                   |
| 11076261 | Chlordane, technical grade    | Insecticides; INSECTICIDES; Pesticides and plant hormones;                                                                                                                                                                                                                                                  |
| 7852067  | Estragole                     | ANTIAGGREGANTS; Drugs acting on the blood and cardiovascular system;                                                                                                                                                                                                                                        |
| 7851821  | Cimetidine                    | ALCOHOL-DEHYDROGENASE-INHIBITORS; ANTIHISTAMINES-H2; Anti-Ulcer Agents; ANTIULCERS; Drugs acting on the gastrointestinal system; Enzyme Inhibitors; Enzymes and inhibitors; GASTRIC-SECRETION-INHIBITORS; Histamine H2 Antagonists;                                                                         |
| 11076479 | Molinate                      | Antispermatic Agents; Herbicides; HERBICIDES; Pesticides and plant hormones;                                                                                                                                                                                                                                |
| 7852109  | Eugenol                       | Anesthetics and drugs relieving fever, inflammation and pain; ANTIPIRETICS; LOCAL-ANESTHETICS;                                                                                                                                                                                                              |
| 11076029 | 2-Bromopropane                | Mutagens; Solvents;                                                                                                                                                                                                                                                                                         |
| 11076431 | Luminol                       | Indicators and Reagents;                                                                                                                                                                                                                                                                                    |
| 7852616  | Phenol                        | Anesthetics and drugs relieving fever, inflammation and pain; Anti-Infective Agents, Local; ANTIPIRETICS; Disinfectants; Sclerosing Solutions;                                                                                                                                                              |
| 7853909  | Celecoxib                     | ANALGESICS; Anesthetics and drugs relieving fever, inflammation and pain; ANTIHISTAMINES-H2; Anti-Inflammatory Agents, Non-Steroidal; ANTIPIRETICS; CYCLOOXYGENASE-2-INHIBITORS; Cyclooxygenase Inhibitors; CYCLOOXYGENASE-INHIBITORS; Drugs acting on the gastrointestinal system; Enzymes and inhibitors; |
| 7853503  | 2-Methylimidazole *           | Activity terms, miscellaneous; ANTIARTERIOSCLEROTICS; Drugs acting on the blood and cardiovascular system; IONEXCHANGERS;                                                                                                                                                                                   |
| 7852076  | Ethanol                       | Anesthetics and drugs relieving fever, inflammation and pain; Anti-Infective Agents, Local; Central Nervous System Depressants; Disinfectants; Drug Carriers; GEN.ANESTHETICS; Preservatives, Pharmaceutical; Solvents; Surface-Active Agents;                                                              |
| 7851498  | Acetaminophen                 | ANALGESICS; Analgesics, Non-Narcotic; Anesthetics and                                                                                                                                                                                                                                                       |

|          |                         |                                                                                                                                                                                                                                                                                                                                                                                                                                                                                                                                                                                                                                                                                                                                                                                                                                                                                                                                                                                                                                                                                                                                                                                                                                                                                                                                                                                                                                                                                                                                                                                                                                                                                                                                                                                                          |
|----------|-------------------------|----------------------------------------------------------------------------------------------------------------------------------------------------------------------------------------------------------------------------------------------------------------------------------------------------------------------------------------------------------------------------------------------------------------------------------------------------------------------------------------------------------------------------------------------------------------------------------------------------------------------------------------------------------------------------------------------------------------------------------------------------------------------------------------------------------------------------------------------------------------------------------------------------------------------------------------------------------------------------------------------------------------------------------------------------------------------------------------------------------------------------------------------------------------------------------------------------------------------------------------------------------------------------------------------------------------------------------------------------------------------------------------------------------------------------------------------------------------------------------------------------------------------------------------------------------------------------------------------------------------------------------------------------------------------------------------------------------------------------------------------------------------------------------------------------------|
|          |                         | drugs relieving fever, inflammation and pain; ANTIHISTAMINES-H2; ANTIPYRETICS; Drugs acting on the gastrointestinal system;                                                                                                                                                                                                                                                                                                                                                                                                                                                                                                                                                                                                                                                                                                                                                                                                                                                                                                                                                                                                                                                                                                                                                                                                                                                                                                                                                                                                                                                                                                                                                                                                                                                                              |
| 11076378 | Flutamide               | Androgen Antagonists; ANDROGEN-ANTAGONISTS; Antineoplastic Agents, Hormonal; Hormones and antagonists;                                                                                                                                                                                                                                                                                                                                                                                                                                                                                                                                                                                                                                                                                                                                                                                                                                                                                                                                                                                                                                                                                                                                                                                                                                                                                                                                                                                                                                                                                                                                                                                                                                                                                                   |
| 11076640 | Sodium Chlorate         | Herbicides;                                                                                                                                                                                                                                                                                                                                                                                                                                                                                                                                                                                                                                                                                                                                                                                                                                                                                                                                                                                                                                                                                                                                                                                                                                                                                                                                                                                                                                                                                                                                                                                                                                                                                                                                                                                              |
| 11076171 | Acetonylacetone         | Cholinesterase Inhibitors; Cross-Linking Reagents; Neurotoxins;                                                                                                                                                                                                                                                                                                                                                                                                                                                                                                                                                                                                                                                                                                                                                                                                                                                                                                                                                                                                                                                                                                                                                                                                                                                                                                                                                                                                                                                                                                                                                                                                                                                                                                                                          |
| 11076432 | Malachite Green Oxalate | Anti-Infective Agents, Local; Coloring Agents; Fungicides, Industrial;                                                                                                                                                                                                                                                                                                                                                                                                                                                                                                                                                                                                                                                                                                                                                                                                                                                                                                                                                                                                                                                                                                                                                                                                                                                                                                                                                                                                                                                                                                                                                                                                                                                                                                                                   |
| 11076634 | Saquinavir Mesylate     | Antimicrobials and chemotherapeutics; Enzymes and inhibitors; HIV Protease Inhibitors; HIV-PROTEASE-INHIBITORS; PEPTIDE-HYDROLASE-INHIBITORS; VIRUCIDES;                                                                                                                                                                                                                                                                                                                                                                                                                                                                                                                                                                                                                                                                                                                                                                                                                                                                                                                                                                                                                                                                                                                                                                                                                                                                                                                                                                                                                                                                                                                                                                                                                                                 |
| 7851950  | Chlorpyrifos            | Cholinesterase Inhibitors; Insecticides; INSECTICIDES; Pesticides and plant hormones;                                                                                                                                                                                                                                                                                                                                                                                                                                                                                                                                                                                                                                                                                                                                                                                                                                                                                                                                                                                                                                                                                                                                                                                                                                                                                                                                                                                                                                                                                                                                                                                                                                                                                                                    |
| 7852393  | Monochloroacetic Acid * | HERBICIDES; Pesticides and plant hormones;                                                                                                                                                                                                                                                                                                                                                                                                                                                                                                                                                                                                                                                                                                                                                                                                                                                                                                                                                                                                                                                                                                                                                                                                                                                                                                                                                                                                                                                                                                                                                                                                                                                                                                                                                               |
| 11076467 | Methyleugenol           | Anesthetics; Carcinogens; Mutagens;                                                                                                                                                                                                                                                                                                                                                                                                                                                                                                                                                                                                                                                                                                                                                                                                                                                                                                                                                                                                                                                                                                                                                                                                                                                                                                                                                                                                                                                                                                                                                                                                                                                                                                                                                                      |
| 7853820  | Bisacodyl               | Cathartics; Drugs acting on the gastrointestinal system; LAXATIVES;                                                                                                                                                                                                                                                                                                                                                                                                                                                                                                                                                                                                                                                                                                                                                                                                                                                                                                                                                                                                                                                                                                                                                                                                                                                                                                                                                                                                                                                                                                                                                                                                                                                                                                                                      |
| 7854313  | Melatonin               | Adjuvants, Immunologic; Anticonvulsants; Antioxidants; Free Radical Scavengers;                                                                                                                                                                                                                                                                                                                                                                                                                                                                                                                                                                                                                                                                                                                                                                                                                                                                                                                                                                                                                                                                                                                                                                                                                                                                                                                                                                                                                                                                                                                                                                                                                                                                                                                          |
| 7851521  | Acrylonitrile           | Carcinogens;                                                                                                                                                                                                                                                                                                                                                                                                                                                                                                                                                                                                                                                                                                                                                                                                                                                                                                                                                                                                                                                                                                                                                                                                                                                                                                                                                                                                                                                                                                                                                                                                                                                                                                                                                                                             |
| 7852319  | Methoxychlor            | Insecticides; INSECTICIDES; Pesticides and plant hormones;                                                                                                                                                                                                                                                                                                                                                                                                                                                                                                                                                                                                                                                                                                                                                                                                                                                                                                                                                                                                                                                                                                                                                                                                                                                                                                                                                                                                                                                                                                                                                                                                                                                                                                                                               |
| 7853355  | Diethanolamine *        | Activity terms, miscellaneous; Adrenergic alpha-Antagonists; Adrenergic Uptake Inhibitors; ANALGESICS; Analgesics, Non-Narcotic; Anesthetics and drugs relieving fever, inflammation and pain; Anthelmintics; ANTHELMINTICS; ANTIARRHYTHMICS; Anticancer drugs and carcinogens; Anticoagulants; ANTIDEPRESSANTS; Antidepressive Agents; Antidepressive Agents, Tricyclic; ANTIDIABETICS; ANTIEMETICS; Antifungal Agents; ANTIHISTAMINES-H1; ANTIHISTAMINES-H2; Antihypertensive Agents; Anti-Infective Agents; Anti-Inflammatory Agents, Non-Steroidal; Antimalarials; Antimanic Agents; Antimicrobials and chemotherapeutics; Antinematodal Agents; Antiparkinson Agents; Antipruritics; ANTIPYRETICS; ANTISEROTONINS; Anti thyroid Agents; Biocompatible Materials; Buffers; CALCIUM-ANTAGONISTS; Calcium Channel Blockers; Cardiovascular Agents; Cathartics; Chelating Agents; CHELATORS; Coloring Agents; CYCLOOXYGENASE-1-INHIBITORS; CYCLOOXYGENASE-2-INHIBITORS; Cyclooxygenase Inhibitors; CYCLOOXYGENASE-INHIBITORS; DIAGNOSTICS; Diuretics; Dopamine Agonists; DOPAMINERGICS; Drugs acting on the blood and cardiovascular system; Drugs acting on the gastrointestinal system; Drugs acting on the nervous system; Drugs acting on the skin; Enzyme Inhibitors; Enzymes and inhibitors; Estradiol Antagonists; Estrogen Antagonists; ESTROGEN-ANTAGONISTS; Expectorants; Fertility Agents, Female; Fixatives; Folic Acid Antagonists; Food Additives; FUNGICIDES; Fungicides, Industrial; Gastrointestinal Agents; Gout Suppressants; Histamine Agonists; Histamine H1 Antagonists; Hormones and antagonists; HYPOTENSIVES; IMMUNOSTIMULANTS; IMMUNOSUPPRESSIVES; Indicators and Reagents; Keratolytic Agents; KERATOLYTICS; Lipotropic Agents; Mutagens; Neuromuscular Depolarizing Agents; |

|          |                                      |                                                                                                                                                                                                                                                                                                                                                                                                                                                   |
|----------|--------------------------------------|---------------------------------------------------------------------------------------------------------------------------------------------------------------------------------------------------------------------------------------------------------------------------------------------------------------------------------------------------------------------------------------------------------------------------------------------------|
|          |                                      | Nootropic Agents; PARASYMPATHOMIMETICS; PENETRATION-ENHANCERS; Progestins; PROGESTOGENS; PROSTAGLANDIN-ANTAGONISTS; PROTOZOACIDES; PSYCHOSEDATIVES; PSYCHOSTIMULANTS; Psychotropic agents; Radiation-Protective Agents; Radiopharmaceuticals; Selective Estrogen Receptor Modulators; Serotonin Agonists; SYMPATHOLYTICS-ALPHA; THROMBOXANE-ANTAGONISTS; Tocolytic Agents; TRANQUILIZERS; Vasodilator Agents; Vitamins and antagonists; VITAMINS; |
| 7851690  | Bromodichloromethane                 | Carcinogens;                                                                                                                                                                                                                                                                                                                                                                                                                                      |
| 11075960 | 2,3-Dibromopropionic Acid            | Antimicrobials and chemotherapeutics; FUNGICIDES;                                                                                                                                                                                                                                                                                                                                                                                                 |
| 11076621 | p-tert Butylcatechol                 | Antioxidants;                                                                                                                                                                                                                                                                                                                                                                                                                                     |
| 7853421  | Disulfoton                           | Insecticides; INSECTICIDES; Pesticides and plant hormones;                                                                                                                                                                                                                                                                                                                                                                                        |
| 11076300 | D&C Red Dye 27                       | Fluorescent Dyes;                                                                                                                                                                                                                                                                                                                                                                                                                                 |
| 7852033  | Diphenylhydantoin                    | Anticonvulsants; ANTICONVULSANTS; Drugs acting on the nervous system;                                                                                                                                                                                                                                                                                                                                                                             |
| 7851578  | Anethole                             | ANTITUSSIVES; Drugs acting on the respiratory system; EXPECTORANTS; Flavoring Agents;                                                                                                                                                                                                                                                                                                                                                             |
| 11075907 | 1,3-Dichloropropene                  | Insecticides;                                                                                                                                                                                                                                                                                                                                                                                                                                     |
| 7852052  | Endosulfan                           | Insecticides; INSECTICIDES; Pesticides and plant hormones;                                                                                                                                                                                                                                                                                                                                                                                        |
| 7852698  | 1,2-Propylene glycol                 | Solvents; Vehicles;                                                                                                                                                                                                                                                                                                                                                                                                                               |
| 7852099  | Di(2-Ethylhexyl phthalate)           | Drugs acting on the skin; Plasticizers; RADIOPROTECTIVES;                                                                                                                                                                                                                                                                                                                                                                                         |
| 7852730  | Resorcinol                           | Anesthetics and drugs relieving fever, inflammation and pain; ANTIPYRETICS;                                                                                                                                                                                                                                                                                                                                                                       |
| 7851840  | Coumarin                             | Anticoagulants; Antineoplastic Agents;                                                                                                                                                                                                                                                                                                                                                                                                            |
| 7851712  | t-Butylhydroquinone                  | Antioxidants; Enzyme Inhibitors;                                                                                                                                                                                                                                                                                                                                                                                                                  |
| 7852464  | Nitrofurantoin                       | Anesthetics and drugs relieving fever, inflammation and pain; Anti-Infective Agents, Urinary; ANTIPYRETICS;                                                                                                                                                                                                                                                                                                                                       |
| 11076635 | Scopolamine hydrobromide trihydrate  | Adjuvants, Anesthesia; Drugs acting on the nervous system; Muscarinic Antagonists; Mydriatics; MYDRIATICS; PARASYMPATHOLYTICS; Psychotropic agents; SEDATIVES;                                                                                                                                                                                                                                                                                    |
| 11076272 | Cinnamaldehyde (trans), neat         | Antimutagenic Agents; Antineoplastic Agents, Phytogenic; Flavoring Agents;                                                                                                                                                                                                                                                                                                                                                                        |
| 11076146 | 5-(Hydroxymethyl)-2-furfural ((HMF)) | Activity terms, miscellaneous; UTEROTONICS;                                                                                                                                                                                                                                                                                                                                                                                                       |
| 7852171  | Heptachlor                           | Insecticides; INSECTICIDES; Pesticides and plant hormones; Soil Pollutants;                                                                                                                                                                                                                                                                                                                                                                       |
| 7851598  | L-Ascorbic Acid                      | Antioxidants; Vitamins;                                                                                                                                                                                                                                                                                                                                                                                                                           |
| 7852002  | 7,12-Dimethylbenz(a)anthracene       | Carcinogens;                                                                                                                                                                                                                                                                                                                                                                                                                                      |
| 11076282 | Cresol (m-/p- mixture)               | Anesthetics and drugs relieving fever, inflammation and pain; Anti-Infective Agents, Local; ANTIPYRETICS; Disinfectants; Sclerosing Solutions;                                                                                                                                                                                                                                                                                                    |
| 11076199 | Annatto Extract Acid Proof           | Food Coloring Agents;                                                                                                                                                                                                                                                                                                                                                                                                                             |
| 11076322 | Dideoxydideohydrothymidine           | Anti-HIV Agents; Antimetabolites; Antimicrobials and chemotherapeutics; Antiviral Agents; Enzymes and inhibitors; HIV-PROTEASE-INHIBITORS; PEPTIDE-HYDROLASE-INHIBITORS; Reverse Transcriptase Inhibitors; REVERSE-TRANSCRIPTASE-INHIBITORS; VIRUCIDES;                                                                                                                                                                                           |
| 11076271 | Cinnamaldehyde                       | Antimutagenic Agents; Antineoplastic Agents, Phytogenic; Flavoring Agents;                                                                                                                                                                                                                                                                                                                                                                        |
| 11076255 | Carisoprodol                         | ANALGESICS; Anesthetics and drugs relieving fever, inflammation and pain; Drugs acting on the nervous system;                                                                                                                                                                                                                                                                                                                                     |

|          |                                    |                                                                                                                                                                                                                                     |
|----------|------------------------------------|-------------------------------------------------------------------------------------------------------------------------------------------------------------------------------------------------------------------------------------|
|          |                                    | Muscle Relaxants, Central; RELAXANTS;                                                                                                                                                                                               |
| 11076210 | Benzethonium chloride              | Anesthetics and drugs relieving fever, inflammation and pain; Anticancer drugs and carcinogens; Anti-Infective Agents, Local; Antiprotozoal Agents; ANTIPYRETICS; CYTOSTATICS;                                                      |
| 7851646  | o-Benzyl-p-chlorophenol            | Anesthetics and drugs relieving fever, inflammation and pain; ANTIPYRETICS;                                                                                                                                                         |
| 7852068  | Ethinyl estradiol                  | Estrogens; ESTROGENS; Hormones and antagonists;                                                                                                                                                                                     |
| 7853258  | o-Cresol                           | Anesthetics and drugs relieving fever, inflammation and pain; Anti-Infective Agents, Local; ANTIPYRETICS; Disinfectants; Sclerosing Solutions;                                                                                      |
| 11076174 | Acrylamide                         | ANALGESICS; Anesthetics and drugs relieving fever, inflammation and pain;                                                                                                                                                           |
| 7852191  | 2,6-Diisopropylphenol              | Anesthetics and drugs relieving fever, inflammation and pain; Anesthetics, Intravenous; Anticonvulsants; Antiemetics; Free Radical Scavengers; GEN.ANESTHETICS; Hypnotics and Sedatives;                                            |
| 11076356 | Emodin (bulk)                      | Anticancer drugs and carcinogens; Antimicrobials and chemotherapeutics; Enzyme Inhibitors; FUNGICIDES; TYROSINE-KINASE-INHIBITORS;                                                                                                  |
| 7851975  | 2,4-Dimethoxyaniline hydrochloride | Carcinogens; Indicators and Reagents;                                                                                                                                                                                               |
| 11076302 | Daunomycin HCL                     | Antibiotics, Antineoplastic; ANTIBIOTICS; Anticancer drugs and carcinogens; Antimicrobials and chemotherapeutics; CYTOSTATICS; DNA-INTERCALATORS; P-GLYCOPROTEIN-INHIBITORS;                                                        |
| 7852065  | 17-beta-Estradiol                  | Anticancer drugs and carcinogens; Antineoplastic Agents, Alkylating; Antineoplastic Agents, Hormonal; CYTOSTATICS; Estrogens; ESTROGENS; Hormones and antagonists; Radiation-Protective Agents;                                     |
| 7852180  | Hexachlorocyclopentadiene          | Teratogens;                                                                                                                                                                                                                         |
| 11076647 | Sodium nitrite                     | Food Preservatives; Indicators and Reagents;                                                                                                                                                                                        |
| 7852617  | Phenolphthalein                    | Cathartics; Drugs acting on the gastrointestinal system; Indicators and Reagents; LAXATIVES;                                                                                                                                        |
| 7852242  | Isobutyl nitrite                   | Vasodilator Agents;                                                                                                                                                                                                                 |
| 7853906  | Cefuroxime Free Acid               | Anti-Bacterial Agents; ANTIBIOTICS; Antimicrobials and chemotherapeutics;                                                                                                                                                           |
| 7852824  | Tetramethylthiuram disulfide       | Anesthetics and drugs relieving fever, inflammation and pain; Antifungal Agents; Anti-Infective Agents, Local; Antimicrobials and chemotherapeutics; ANTIPYRETICS; Enzyme Inhibitors; Fungicides, Industrial; FUNGICIDES; Mutagens; |
| 11076653 | Succinonitrile                     | ANTIDEPRESSANTS; ANTIPRURITICS; Drugs acting on the skin; PSYCHOSTIMULANTS; Psychotropic agents;                                                                                                                                    |
| 11076283 | Croton oil                         | Dermatologic Agents;                                                                                                                                                                                                                |
| 7852303  | Mercuric chloride                  | Anti-Infective Agents, Local; Disinfectants;                                                                                                                                                                                        |
| 11076154 | 5-Methoxypsoralen                  | Activity terms, miscellaneous; RADIOSENSITIZERS;                                                                                                                                                                                    |
| 7853394  | Tributyl phosphate                 | Radiation-Protective Agents;                                                                                                                                                                                                        |
| 7851736  | Semicarbazide HCl                  | Carcinogens;                                                                                                                                                                                                                        |
| 7852450  | 4-Nitro-o-phenylenediamine         | Carcinogens; Indicators and Reagents;                                                                                                                                                                                               |
| 7852643  | o-Phenylphenol                     | Anti-Infective Agents; Antimicrobials and chemotherapeutics; Carcinogens; Disinfectants; Fungicides, Industrial; FUNGICIDES;                                                                                                        |
| 7852856  | o-Toluidine HCl                    | Carcinogens; Indicators and Reagents;                                                                                                                                                                                               |
| 11076689 | Triacetin (1,2,3-Propanetriol      | Antifungal Agents; Anti-Infective Agents, Local; Antimicrobials                                                                                                                                                                     |

|          |                                                |                                                                                                                                                                                                                                                                                             |
|----------|------------------------------------------------|---------------------------------------------------------------------------------------------------------------------------------------------------------------------------------------------------------------------------------------------------------------------------------------------|
|          | triacetate)                                    | and chemotherapeutics; Drugs acting on the blood and cardiovascular system; FUNGICIDES; HYPOTENSIVES;                                                                                                                                                                                       |
| 7852073  | 2-Ethoxybenzamide (Ethenzamide)                | ANALGESICS; Anesthetics and drugs relieving fever, inflammation and pain;                                                                                                                                                                                                                   |
| 11076666 | Terephthalic acid                              | Free Radical Scavengers;                                                                                                                                                                                                                                                                    |
| 11076594 | Phenyl glyoxal                                 | Enzyme Inhibitors; Indicators and Reagents;                                                                                                                                                                                                                                                 |
| 11076021 | 2-Aminoanthracene                              | Carcinogens; Mutagens;                                                                                                                                                                                                                                                                      |
| 7852759  | Sesamol                                        | Activity terms, miscellaneous; Antioxidants; ANTIOXIDANTS; Drugs acting on the skin; RADIOPROTECTIVES;                                                                                                                                                                                      |
| 11076706 | Vat blue 1 (Indigo) (C.I. 73000)               | Coloring Agents;                                                                                                                                                                                                                                                                            |
| 7852846  | Titanocene dichloride                          | Antineoplastic Agents;                                                                                                                                                                                                                                                                      |
| 7852112  | Fenthion (Baytex)                              | ANTICHOLINESTERASES; Cholinesterase Inhibitors; Drugs acting on the nervous system; Insecticides; INSECTICIDES; Pesticides and plant hormones;                                                                                                                                              |
| 11076157 | 6-Mercaptopurine monohydrate                   | Anticancer drugs and carcinogens; Antimetabolites; Antimetabolites, Antineoplastic; CYTOSTATICS; Immunosuppressive Agents; Nucleic Acid Synthesis Inhibitors;                                                                                                                               |
| 7852299  | 2-Mercaptobenzothiazole                        | Antifungal Agents; Antimicrobials and chemotherapeutics; FUNGICIDES;                                                                                                                                                                                                                        |
| 7853382  | Vanillin                                       | Anticonvulsants; Antimutagenic Agents; Antioxidants;                                                                                                                                                                                                                                        |
| 7851555  | 2-Amino-5-nitrophenol                          | Anesthetics and drugs relieving fever, inflammation and pain; Anti-Infective Agents, Local; ANTIPYRETICS; Disinfectants; Sclerosing Solutions;                                                                                                                                              |
| 7853349  | 1,3,5-Trioxane                                 | Anti-Infective Agents, Local; Disinfectants; Fixatives;                                                                                                                                                                                                                                     |
| 7853305  | p-Xylene                                       | Solvents;                                                                                                                                                                                                                                                                                   |
| 7853257  | o-Xylene                                       | Solvents;                                                                                                                                                                                                                                                                                   |
| 7852108  | 1,8-Cineol (Eucalyptol)                        | Activity terms, miscellaneous; Anesthetics and drugs relieving fever, inflammation and pain; ANTHELMINTICS; Anti-Infective Agents; Antimicrobials and chemotherapeutics; ANTIPYRETICS; ANTITUSSIVES; Drugs acting on the respiratory system; EXPECTORANTS; PENETRATION-ENHANCERS; Solvents; |
| 7852778  | Styrene oxide                                  | Carcinogens; Mutagens;                                                                                                                                                                                                                                                                      |
| 11076320 | Dicyclohexylamine                              | Anesthetics and drugs relieving fever, inflammation and pain; ANTIPYRETICS; Enzyme Inhibitors; Explosive Agents;                                                                                                                                                                            |
| 11076428 | Linalool                                       | Insecticides;                                                                                                                                                                                                                                                                               |
| 11075906 | 1,3-Dichloro-2-propanol                        | Cross-Linking Reagents; Mutagens;                                                                                                                                                                                                                                                           |
| 11075900 | 1,2-Epoxy-3-butene                             | Mutagens;                                                                                                                                                                                                                                                                                   |
| 7854709  | Triethylenetetramine                           | Activity terms, miscellaneous; Chelating Agents; CHELATORS; Indicators and Reagents;                                                                                                                                                                                                        |
| 11076235 | Biuret (Carbamylurea; Imidodicarbonic diamide) | Indicators and Reagents;                                                                                                                                                                                                                                                                    |
| 7852369  | 1-Methylnaphthalene                            | ACARICIDES; Carcinogens; Explosive Agents; Pesticides and plant hormones; Tocolytic Agents; Vasodilator Agents;                                                                                                                                                                             |
| 11076517 | Nifedipine                                     | CALCIUM-ANTAGONISTS; Calcium Channel Blockers; CARBONIC-ANHYDRASE-INHIBITORS; Drugs acting on the blood and cardiovascular system; Enzymes and inhibitors; Tocolytic Agents; Vasodilator Agents;                                                                                            |
| 7853942  | Carminic acid                                  | Activity terms, miscellaneous; Coloring Agents; DYE; Food Coloring Agents; Hemostatics;                                                                                                                                                                                                     |
| 7852470  | 1-Nitronaphthalene                             | ACARICIDES; Carcinogens; Explosive Agents; Pesticides and plant hormones; Tocolytic Agents; Vasodilator Agents;                                                                                                                                                                             |
| 11075987 | 2,4-Dinitro-1-naphtho-7-sulfonic               | Coloring Agents;                                                                                                                                                                                                                                                                            |

|          |                                           |                                                                                                                                                                                                                                                                                                                                                                                                                                                                                                                                                                                                                                                                                                                                                                                                                                                                                                                                                                                                                                                                                                                                                                                                                                                                                                                                                                                                                                                                                                                                                                                                                                                                                                                                                                                                                                                                                                                                                                                                                                                                                                                                                                                                                                                           |
|----------|-------------------------------------------|-----------------------------------------------------------------------------------------------------------------------------------------------------------------------------------------------------------------------------------------------------------------------------------------------------------------------------------------------------------------------------------------------------------------------------------------------------------------------------------------------------------------------------------------------------------------------------------------------------------------------------------------------------------------------------------------------------------------------------------------------------------------------------------------------------------------------------------------------------------------------------------------------------------------------------------------------------------------------------------------------------------------------------------------------------------------------------------------------------------------------------------------------------------------------------------------------------------------------------------------------------------------------------------------------------------------------------------------------------------------------------------------------------------------------------------------------------------------------------------------------------------------------------------------------------------------------------------------------------------------------------------------------------------------------------------------------------------------------------------------------------------------------------------------------------------------------------------------------------------------------------------------------------------------------------------------------------------------------------------------------------------------------------------------------------------------------------------------------------------------------------------------------------------------------------------------------------------------------------------------------------------|
|          | acid                                      |                                                                                                                                                                                                                                                                                                                                                                                                                                                                                                                                                                                                                                                                                                                                                                                                                                                                                                                                                                                                                                                                                                                                                                                                                                                                                                                                                                                                                                                                                                                                                                                                                                                                                                                                                                                                                                                                                                                                                                                                                                                                                                                                                                                                                                                           |
| 7852325  | t-Butyl methyl ether                      | Air Pollutants; Carcinogens;                                                                                                                                                                                                                                                                                                                                                                                                                                                                                                                                                                                                                                                                                                                                                                                                                                                                                                                                                                                                                                                                                                                                                                                                                                                                                                                                                                                                                                                                                                                                                                                                                                                                                                                                                                                                                                                                                                                                                                                                                                                                                                                                                                                                                              |
| 7852205  | Hydrochlorothiazide                       | Activity terms, miscellaneous; Antihypertensive Agents; CARBONIC-ANHYDRASE-INHIBITORS; Diuretics; DIURETICS; Drugs acting on the blood and cardiovascular system; Enzymes and inhibitors; HYPOTENSIVES; Sodium Chloride Symporter Inhibitors;                                                                                                                                                                                                                                                                                                                                                                                                                                                                                                                                                                                                                                                                                                                                                                                                                                                                                                                                                                                                                                                                                                                                                                                                                                                                                                                                                                                                                                                                                                                                                                                                                                                                                                                                                                                                                                                                                                                                                                                                             |
| 7854190  | o-Methoxyphenol                           | ANTIAGGREGANTS; Disinfectants; Drugs acting on the blood and cardiovascular system; Expectorants;                                                                                                                                                                                                                                                                                                                                                                                                                                                                                                                                                                                                                                                                                                                                                                                                                                                                                                                                                                                                                                                                                                                                                                                                                                                                                                                                                                                                                                                                                                                                                                                                                                                                                                                                                                                                                                                                                                                                                                                                                                                                                                                                                         |
| 7852769  | Sorbic acid                               | Food Preservatives;                                                                                                                                                                                                                                                                                                                                                                                                                                                                                                                                                                                                                                                                                                                                                                                                                                                                                                                                                                                                                                                                                                                                                                                                                                                                                                                                                                                                                                                                                                                                                                                                                                                                                                                                                                                                                                                                                                                                                                                                                                                                                                                                                                                                                                       |
| 7854559  | Propyl-4-hydroxybenzoate (Propyl paraben) | Anesthetics and drugs relieving fever, inflammation and pain; ANTIPYRETICS;                                                                                                                                                                                                                                                                                                                                                                                                                                                                                                                                                                                                                                                                                                                                                                                                                                                                                                                                                                                                                                                                                                                                                                                                                                                                                                                                                                                                                                                                                                                                                                                                                                                                                                                                                                                                                                                                                                                                                                                                                                                                                                                                                                               |
| 11076359 | Ethacrynic acid                           | Diuretics; Enzyme Inhibitors;                                                                                                                                                                                                                                                                                                                                                                                                                                                                                                                                                                                                                                                                                                                                                                                                                                                                                                                                                                                                                                                                                                                                                                                                                                                                                                                                                                                                                                                                                                                                                                                                                                                                                                                                                                                                                                                                                                                                                                                                                                                                                                                                                                                                                             |
| 7852232  | Indomethacin                              | Activity terms, miscellaneous; Adrenergic alpha-Antagonists; Adrenergic Uptake Inhibitors; ANALGESICS; Analgesics, Non-Narcotic; Anesthetics and drugs relieving fever, inflammation and pain; Anthelmintics; ANTHELMINTICS; ANTIARRHYTHMICS; Anticancer drugs and carcinogens; Anticoagulants; ANTIDEPRESSANTS; Antidepressive Agents; Antidepressive Agents, Tricyclic; ANTIDIABETICS; ANTIEMETICS; Antifungal Agents; ANTIHISTAMINES-H1; ANTIHISTAMINES-H2; Antihypertensive Agents; Anti-Infective Agents; Anti-Inflammatory Agents, Non-Steroidal; Antimalarials; Antimanic Agents; Antimicrobials and chemotherapeutics; Antinematodal Agents; Antiparkinson Agents; Antipruritics; ANTIPYRETICS; ANTISEROTONINS; Antithyroid Agents; Biocompatible Materials; Buffers; CALCIUM-ANTAGONISTS; Calcium Channel Blockers; Cardiovascular Agents; Cathartics; Chelating Agents; CHELATORS; Coloring Agents; CYCLOOXYGENASE-1-INHIBITORS; CYCLOOXYGENASE-2-INHIBITORS; Cyclooxygenase Inhibitors; CYCLOOXYGENASE-INHIBITORS; DIAGNOSTICS; Diuretics; Dopamine Agonists; DOPAMINERGICS; Drugs acting on the blood and cardiovascular system; Drugs acting on the gastrointestinal system; Drugs acting on the nervous system; Drugs acting on the skin; Enzyme Inhibitors; Enzymes and inhibitors; Estradiol Antagonists; Estrogen Antagonists; ESTROGEN-ANTAGONISTS; Expectorants; Fertility Agents, Female; Fixatives; Folic Acid Antagonists; Food Additives; FUNGICIDES; Fungicides, Industrial; Gastrointestinal Agents; Gout Suppressants; Histamine Agonists; Histamine H1 Antagonists; Hormones and antagonists; HYPOTENSIVES; IMMUNOSTIMULANTS; IMMUNOSUPPRESSIVES; Indicators and Reagents; Keratolytic Agents; KERATOLYTICS; Lipotropic Agents; Mutagens; Neuromuscular Depolarizing Agents; Nootropic Agents; PARASYMPATHOMIMETICS; PENETRATION-ENHANCERS; Progestins; PROGESTOGENS; PROSTAGLANDIN-ANTAGONISTS; PROTOZOACIDES; PSYCHOSEDATIVES; PSYCHOSTIMULANTS; Psychotropic agents; Radiation-Protective Agents; Radiopharmaceuticals; Selective Estrogen Receptor Modulators; Serotonin Agonists; SYMPATHOLYTICS-ALPHA; THROMBOXANE-ANTAGONISTS; Tocolytic Agents; TRANQUILIZERS; Vasodilator Agents; Vitamins and antagonists; VITAMINS; |

|          |                                                              |                                                                                                                                                                                         |
|----------|--------------------------------------------------------------|-----------------------------------------------------------------------------------------------------------------------------------------------------------------------------------------|
| 11076297 | Cyclophosphamide monohydrate                                 | Anticancer drugs and carcinogens; Antineoplastic Agents, Alkylating; Antirheumatic Agents; CYTOSTATICS; Immunosuppressive Agents; IMMUNOSUPPRESSIVES; Mutagens; Myeloablative Agonists; |
| 7851539  | Allyl isothiocyanate                                         | Food Preservatives;                                                                                                                                                                     |
| 11076679 | Tetralin                                                     | INSECTICIDES; Pesticides and plant hormones;                                                                                                                                            |
| 11076287 | Cumene hydroperoxide                                         | Oxidants;                                                                                                                                                                               |
| 7851865  | Rhothane (TDE)                                               | Insecticides;                                                                                                                                                                           |
| 7853380  | 2,4-Dinitrotoluene                                           | Carcinogens;                                                                                                                                                                            |
| 11075956 | 2,3,5,6-Tetrachloronitrobenzene                              | Antimicrobials and chemotherapeutics; FUNGICIDES;                                                                                                                                       |
| 7851708  | Butylated hydroxytoluene (BHT)                               | Antioxidants;                                                                                                                                                                           |
| 7853646  | Counter 15G (O,O-Diethyl-S-(((1,1-dimethylethyl)thio)methyl) | INSECTICIDES; Pesticides and plant hormones;                                                                                                                                            |
| 7852939  | Xylene, mixed isomers                                        | Solvents;                                                                                                                                                                               |
| 7853452  | 4,6-Dinitro-o-cresol                                         | Herbicides; Pesticides; Uncoupling Agents;                                                                                                                                              |
| 11076295 | Cyclopentane                                                 | Anesthetics and drugs relieving fever, inflammation and pain; GEN.ANESTHETICS;                                                                                                          |
| 7852522  | N-Nitrosodiphenylamine                                       | Carcinogens;                                                                                                                                                                            |
| 7852015  | 2,4-Dinitrophenol                                            | Coloring Agents; Uncoupling Agents;                                                                                                                                                     |
| 7852829  | Thiabendazole                                                | ANTHELMINTICS; Antimicrobials and chemotherapeutics; Antinematodal Agents; FUNGICIDES; PROTOZOACIDES;                                                                                   |
| 7852826  | Tetranitromethane                                            | Chemical Warfare Agents; Drugs acting on the blood and cardiovascular system; Explosive Agents; Indicators and Reagents; Oxidants; VASODILATORS;                                        |
| 7854582  | trans-Retinol acid (Vitamin A)                               | Adjuvants, Immunologic; ANGIOGENESIS-INHIBITORS; Anticancer drugs and carcinogens; Anticarcinogenic Agents; Antioxidants; Vitamins and antagonists; Vitamins; VITAMINS;                 |
| 7852680  | Probenecid                                                   | Activity terms, miscellaneous; Adjuvants, Pharmaceutic; Anesthetics and drugs relieving fever, inflammation and pain; ANTIGOUTS; Uricosuric Agents; URICOSURICS;                        |
| 11076528 | n-Nonane                                                     | Activity terms, miscellaneous; PENETRATION-ENHANCERS;                                                                                                                                   |
| 7852058  | 1,2-Epoxy-3-chloropropane (Epichlorohydrin)                  | Activity terms, miscellaneous; ANTIARTERIOSCLEROTICS; Drugs acting on the blood and cardiovascular system; IONEXCHANGERS;                                                               |
| 7852262  | Chlordecone (Kepone)                                         | Insecticides; INSECTICIDES; Pesticides and plant hormones;                                                                                                                              |
| 11076071 | 3-(Methylthio)propanal                                       | Prostaglandin Antagonists;                                                                                                                                                              |
| 11075929 | 1-Fluoro-2,4-dinitrobenzene                                  | Insecticides; INSECTICIDES; Pesticides and plant hormones;                                                                                                                              |
| 11076265 | Chlorotrimethyl silane                                       | Indicators and Reagents;                                                                                                                                                                |
| 11076268 | Chrysophanic acid (1,8-Dihydroxy-3-methylantraquinone)       | Mutagens;                                                                                                                                                                               |
| 11076328 | Digitonin                                                    | CARBONIC-ANHYDRASE-INHIBITORS; CARDIOGLYCOSIDES; Drugs acting on the blood and cardiovascular system; Enzymes and inhibitors; Indicators and Reagents;                                  |
| 11076521 | N-Isopropyl-N'-phenyl-p-phenylenediamine                     | Antioxidants;                                                                                                                                                                           |
| 11076523 | Nitrogen mustard HCl                                         | Alkylating Agents; Antineoplastic Agents, Alkylating; Chemical Warfare Agents; Irritants;                                                                                               |
| 7851653  | Biphenyl                                                     | Fungicides, Industrial;                                                                                                                                                                 |
| 11076203 | Azodicarbonamide                                             | Anti-HIV Agents; Immunosuppressive Agents;                                                                                                                                              |
| 11076163 | 9-Aminoacridine HCl H2O                                      | Anesthetics and drugs relieving fever, inflammation and pain; ANTHELMINTICS; Anti-Infective Agents, Local; Antimicrobials                                                               |

|          |                                                  |                                                                                                                                                                                                                                                                                                                                   |
|----------|--------------------------------------------------|-----------------------------------------------------------------------------------------------------------------------------------------------------------------------------------------------------------------------------------------------------------------------------------------------------------------------------------|
|          |                                                  | and chemotherapeutics; ANTIPYRETICS; Fluorescent Dyes; FUNGICIDES; Indicators and Reagents; Mutagens;                                                                                                                                                                                                                             |
| 7851901  | Dibenz(a,h)anthracene                            | Carcinogens;                                                                                                                                                                                                                                                                                                                      |
| 11075978 | 2,4-D Dimethylamine salt (DMA-4)                 | Herbicides; HERBICIDES; Pesticides and plant hormones;                                                                                                                                                                                                                                                                            |
| 7852619  | Phenoxybenzamine HCl                             | Adrenergic alpha-Antagonists; Antihypertensive Agents; Drugs acting on the blood and cardiovascular system; Drugs acting on the nervous system; HYPOTENSIVES; SYMPATHOLYTICS-ALPHA; Vasodilator Agents; VASODILATORS;                                                                                                             |
| 7852093  | Ethylene thiourea                                | ANTITHYROIDS; Hormones and antagonists;                                                                                                                                                                                                                                                                                           |
| 7851861  | Dacarbazine                                      | Anticancer drugs and carcinogens; Antineoplastic Agents, Alkylating; CYTOSTATICS;                                                                                                                                                                                                                                                 |
| 7851644  | Benzyl alcohol                                   | ANALGESICS; Anesthetics and drugs relieving fever, inflammation and pain; Anesthetics, Local;                                                                                                                                                                                                                                     |
| 11076591 | Pheniramine maleate                              | Activity terms, miscellaneous; Anti-Allergic Agents; ANTIHISTAMINES-H1; Antipruritics; Histamine H1 Antagonists;                                                                                                                                                                                                                  |
| 11076065 | 2-Octyl-3-isothiazolone                          | Anesthetics and drugs relieving fever, inflammation and pain; ANTIPYRETICS;                                                                                                                                                                                                                                                       |
| 11075952 | 2,2'-Thiobis(4-chlorophenol)                     | Antimicrobials and chemotherapeutics; FUNGICIDES;                                                                                                                                                                                                                                                                                 |
| 7852860  | Toxaphene                                        | Insecticides; INSECTICIDES; Pesticides and plant hormones;                                                                                                                                                                                                                                                                        |
| 7851748  | D-Carvone                                        | ANTIFLATULENTS; Antineoplastic Agents, Phytogetic; Drugs acting on the gastrointestinal system;                                                                                                                                                                                                                                   |
| 7851614  | Azinphosmethyl (Gusathion)                       | Cholinesterase Inhibitors; Insecticides; INSECTICIDES; Pesticides and plant hormones;                                                                                                                                                                                                                                             |
| 7852838  | Thiosemicarbazide                                | Convulsants; Drugs acting on the nervous system; Enzyme Inhibitors; GABA-ANTAGONISTS;                                                                                                                                                                                                                                             |
| 7851635  | Benzoic acid                                     | Antifungal Agents; Anti-Infective Agents; Antimetabolites, Antineoplastic; Food Preservatives;                                                                                                                                                                                                                                    |
| 7851532  | Aldrin                                           | Insecticides; INSECTICIDES; Pesticides and plant hormones;                                                                                                                                                                                                                                                                        |
| 11076075 | 3,3,5-Trimethylcyclohexylsalicylate (Homosalate) | Drugs acting on the skin; RADIOPROTECTIVES;                                                                                                                                                                                                                                                                                       |
| 7851738  | Carbarsone                                       | Antimicrobials and chemotherapeutics; PROTOZOACIDES;                                                                                                                                                                                                                                                                              |
| 7852282  | Malaoxon                                         | ANTICHOLINESTERASES; Drugs acting on the nervous system; Insecticides; INSECTICIDES; Pesticides and plant hormones;                                                                                                                                                                                                               |
| 11076630 | Rhein (1,8-Dihydroxy-3-carboxylantraquinone)     | ANALGESICS; Anesthetics and drugs relieving fever, inflammation and pain; ANTIHISTAMINES-H2; Antimicrobials and chemotherapeutics; COLLAGENASE-INHIBITORS; Drugs acting on the gastrointestinal system; Enzyme Inhibitors; Enzymes and inhibitors; FUNGICIDES; MATRIX-METALLOPROTEINASE-INHIBITORS; PEPTIDE-HYDROLASE-INHIBITORS; |
| 11076226 | Berberine chloride                               | Activity terms, miscellaneous; ANTIDIARRHEICS; Drugs acting on the gastrointestinal system; TONICS;                                                                                                                                                                                                                               |
| 7854570  | Pyrilamine                                       | Activity terms, miscellaneous; Anti-Allergic Agents; ANTIHISTAMINES-H1; Histamine H1 Antagonists;                                                                                                                                                                                                                                 |
| 7852283  | Malathion                                        | ACARICIDES; ANTICHOLINESTERASES; Cholinesterase Inhibitors; Drugs acting on the nervous system; Insecticides; INSECTICIDES; Pesticides and plant hormones;                                                                                                                                                                        |
| 11076419 | Kavain, DL-                                      | Anti-Anxiety Agents; Anticonvulsants;                                                                                                                                                                                                                                                                                             |
| 11076298 | Cynarin (Echinacea)(1,3-Dicaffeoylquinic Acid)   | ANTIARTERIOSCLEROTICS; CHOLAGOGUES; Drugs acting on the blood and cardiovascular system; Drugs acting on the gastrointestinal system;                                                                                                                                                                                             |



|          |                |                                                                                                                                                                                                                                                                                                      |
|----------|----------------|------------------------------------------------------------------------------------------------------------------------------------------------------------------------------------------------------------------------------------------------------------------------------------------------------|
| 11076702 | Tyramine HCL   | Activity terms, miscellaneous; Adrenergic Uptake Inhibitors; Detergents; Drugs acting on the blood and cardiovascular system; Drugs acting on the nervous system; MYDRIATICS; Surface-Active Agents; SURFACTANTS; SYMPATHOMIMETICS-ALPHA; SYMPATHOMIMETICS-BETA; Sympathomimetics; VASOCONSTRICTORS; |
| 11076658 | Synephrine     | Adrenergic alpha-Agonists; CARBONIC-ANHYDRASE-INHIBITORS; Drugs acting on the blood and cardiovascular system; Drugs acting on the nervous system; Enzymes and inhibitors; HYPERTENSIVES; Nasal Decongestants; SYMPATHOMIMETICS-ALPHA; Sympathomimetics; Vasoconstrictor Agents; VASOCONSTRICTORS;   |
| 11076543 | Octopamine HCL | Adrenergic alpha-Agonists; ANALEPTICS; ANTIBIOTICS; Antimicrobials and chemotherapeutics; Drugs acting on the blood and cardiovascular system; Drugs acting on the nervous system; Drugs acting on the respiratory system; HYPERTENSIVES; SYMPATHOMIMETICS-ALPHA; Vasoconstrictor Agents;            |

**Table 3.** Cluster membership for the set of 293 compounds clustered against 26 assays, caspase activation and cell viability in 13 cell types.

| Cluster ID | PubChem SID | Name                                              |
|------------|-------------|---------------------------------------------------|
| 0          | 7852412     | 1-Naphthylamine                                   |
| 0          | 7851615     | Azobenzene                                        |
| 0          | 7851942     | Dicofol                                           |
| 0          | 11076583    | Pentabromodiphenyl Oxide (DE-71) Repackaged       |
| 0          | 11075980    | 2,4-Decadienal                                    |
| 0          | 11076283    | Croton oil                                        |
| 0          | 7851775     | 4-Chloro-o-phenylenediamine                       |
| 0          | 7853052     | Dichloroacetonitrile                              |
| 0          | 11076128    | 4-Chloro-3,5-dinitro-a,a,a-trifluorotoluene       |
| 0          | 7852180     | Hexachlorocyclopentadiene                         |
| 0          | 11076387    | Glutaraldehyde (Glutaric dialdehyde)              |
| 1          | 11076160    | 7-Diethylamino-4-methylcoumarin                   |
| 1          | 11075880    | 1-(1,2-Dibromoethyl)-3,4-dibromocyclohexane       |
| 1          | 7852126     | 5-Fluorouracil                                    |
| 1          | 11076637    | Silibinin                                         |
| 1          | 7853909     | Celecoxib                                         |
| 1          | 11076650    | Solvent black 5 (C.I. 50415)                      |
| 2          | 7851733     | Capsaicin                                         |
| 2          | 7852878     | 2,4,6-Trichlorophenol                             |
| 2          | 11076209    | Benzenesulfonyl chloride                          |
| 2          | 7852651     | Phthalic anhydride                                |
| 2          | 7851556     | 4-Amino-2-nitrophenol                             |
| 2          | 11075966    | 2,3-Dichloroquinoxaline                           |
| 2          | 11076553    | o-Nitrobenzyl chloride                            |
| 2          | 11076090    | 3,4-Dinitrotoluene                                |
| 2          | 11076316    | Dibromoacetonitrile                               |
| 2          | 11076272    | Cinnamaldehyde (trans), neat                      |
| 2          | 7852823     | Tetrakis(hydroxymethyl)phosphonium SO4            |
| 2          | 11076331    | Dihydromethysticin                                |
| 2          | 11075953    | 2,3,4,5-Tetrachloronitrobenzene                   |
| 2          | 7853518     | Hydroxyethyl acrylate                             |
| 2          | 11076303    | Dazomet                                           |
| 2          | 11076517    | Nifedipine                                        |
| 2          | 7851749     | Catechol (1,2-Benzenediol)                        |
| 2          | 7852305     | Methyl mercuric (II) chloride                     |
| 3          | 11075941    | 2,2',4,4',5,5'-Hexabromodiphenyl Ether (PBDE-153) |
| 3          | 7851646     | o-Benzyl-p-chlorophenol                           |
| 3          | 7852171     | Heptachlor                                        |
| 3          | 11075958    | 2,3,5-Trichlorophenol                             |
| 3          | 7853198     | 2,3,4,6-Tetrachlorophenol                         |
| 3          | 11075943    | 2,2',4,4'-Tetrabromodiphenyl Ether (PBDE 47)      |
| 3          | 11076226    | Berberine chloride                                |

|   |          |                                      |
|---|----------|--------------------------------------|
| 3 | 11076300 | D&C Red Dye 27                       |
| 3 | 11076124 | 4-Androstenedione                    |
| 3 | 7852182  | Hexachlorophene                      |
| 3 | 11076260 | Cetylpyridinium bromide              |
| 3 | 11076210 | Benzethonium chloride                |
| 3 | 11076680 | tetra-N-Octylammonium bromide        |
| 4 | 11075960 | 2,3-Dibromopropionic Acid            |
| 4 | 7851861  | Dacarbazine                          |
| 4 | 7852166  | Griseofulvin                         |
| 4 | 11076582 | Pentabromodiphenyl Ether (PBDE 99) * |
| 4 | 11076206 | Benomyl                              |
| 4 | 11076234 | Bisphenol A diglycidyl ether         |
| 4 | 11076287 | Cumene hydroperoxide                 |
| 4 | 7851532  | Aldrin                               |
| 4 | 11076252 | Carbendazim                          |
| 4 | 7852068  | Ethinyl estradiol                    |
| 4 | 7852065  | 17-beta-Estradiol                    |
| 5 | 11076707 | Verapamil HCl                        |
| 5 | 7852409  | N-(1-Naphthyl)ethylenediamine 2HCl   |
| 5 | 11076027 | 2-Bromo-4,6-dinitroaniline           |
| 5 | 7852015  | 2,4-Dinitrophenol                    |
| 5 | 11076308 | Desmethoxyyangonin                   |
| 5 | 11076678 | Tetrahydroaminoacridine Monohydrate  |
| 5 | 11076555 | o-Nitrophenyl acetonitrile           |
| 5 | 11076398 | Hydroxyflutamide                     |
| 5 | 7852791  | Chlorotrianisene                     |
| 5 | 11076700 | Triton X-100                         |
| 5 | 7854781  | o,p' -DDT                            |
| 5 | 7852111  | Formulated fenaminosulf              |
| 5 | 11076248 | Cadmium acetate, dihydrate           |
| 5 | 7851718  | Cadmium II chloride                  |
| 5 | 7852865  | Triamterene                          |
| 6 | 11076365 | Ethyl linolenate                     |
| 6 | 11076509 | Neopentyl glycol diglycidyl ether    |
| 6 | 7851820  | Danthron                             |
| 6 | 11076669 | tert-Butylhydroquinone               |
| 6 | 7854754  | Zearalanol                           |
| 6 | 11076587 | Phenamiphos                          |
| 6 | 11076006 | 2'4'5'-Trihydroxybutyrophenone       |
| 6 | 11076015 | 2-Amino-4-methylphenol               |
| 6 | 11076621 | p-tert Butylcatechol                 |
| 6 | 7851614  | Azinphosmethyl (Gusathion)           |
| 6 | 11076566 | p -n -Nonylphenol                    |
| 6 | 11076507 | Nelfinavir mesylate                  |
| 7 | 7851776  | 2-Chloro-p-phenylenediamine SO4      |
| 7 | 11076628 | Pyrogallol                           |
| 7 | 11076202 | Azithromycin                         |
| 7 | 7852052  | Endosulfan                           |

|    |          |                                              |
|----|----------|----------------------------------------------|
| 7  | 11076012 | 2-Amino-4-chlorophenol                       |
| 7  | 11076630 | Rhein (1,8-Dihydroxy-3-carboxylantraquinone) |
| 7  | 7852464  | Nitrofurantoin                               |
| 7  | 11075929 | 1-Fluoro-2,4-dinitrobenzene                  |
| 7  | 7852208  | Hydroquinone                                 |
| 7  | 11076359 | Ethacrynic acid                              |
| 7  | 7851758  | Chloranil                                    |
| 8  | 11076177 | Aldicarb sulfoxide                           |
| 8  | 11076681 | Thiocarbanilide                              |
| 8  | 11076629 | Resveratrol                                  |
| 8  | 7852436  | Nitrofurazone                                |
| 8  | 7852030  | N,N'-Diphenyl-p-phenylenediamine             |
| 8  | 11076020 | 2-Amino-6-nitrobenzothiazole                 |
| 8  | 7854583  | Ribavirin                                    |
| 8  | 11076651 | Solvent black 7 (C.I. 50415B)                |
| 8  | 11076378 | Flutamide                                    |
| 8  | 7851943  | N,N'-Dicyclohexylthiourea                    |
| 8  | 7852613  | Phenformin HCl                               |
| 8  | 11075908 | 1,3-Dicyclohexylcarbodiimide                 |
| 9  | 7852260  | Kaempferol                                   |
| 9  | 7851864  | o,p'-DDD                                     |
| 9  | 7853125  | Dibromonitromethane                          |
| 9  | 11076228 | beta-Nitrostyrene                            |
| 9  | 7852729  | Reserpine                                    |
| 10 | 11076080 | 3,4,5-Trichloronitrobenzene                  |
| 10 | 11076529 | Norbixin (cis/trans mixture)                 |
| 10 | 11076577 | p-Azoxyanisole                               |
| 10 | 11076589 | Phenethyl anthranilate                       |
| 10 | 7851983  | 4-Dimethylaminoazobenzene                    |
| 10 | 11076471 | Methysticin                                  |
| 10 | 11076205 | Basic orange 2 (C.I. 11270)                  |
| 10 | 11076345 | Diphenylurea                                 |
| 10 | 11076018 | 2-Amino-5,6-dimethylbenzothiazole            |
| 10 | 11076477 | m-Nitrobenzyl chloride                       |
| 10 | 7851549  | 1-Amino-2-methylantraquinone (C.I. 60700)    |
| 10 | 7852610  | Phenazopyridine HCl                          |
| 10 | 7851560  | 2-Aminoanthraquinone                         |
| 10 | 11076299 | D & C Yellow II                              |
| 10 | 11076360 | Ethidium bromide                             |
| 10 | 11076356 | Emodin (bulk)                                |
| 10 | 11076522 | Nitazoxanide                                 |
| 10 | 7853959  | Iodochlorohydroxyquinoline                   |
| 11 | 11076334 | Dimenhydrinate                               |
| 11 | 7852690  | Propranolol HCl                              |
| 11 | 7852142  | Gallic acid                                  |
| 11 | 7853448  | Flavone                                      |
| 11 | 11076631 | Rifabutin                                    |
| 11 | 7851867  | p,p'-DDT (Dichlorodiphenyltrichloroethane)   |

|    |          |                                                                |
|----|----------|----------------------------------------------------------------|
| 11 | 7854760  | Genistein (4',5,7-Trihydroxyisoflavone)                        |
| 11 | 11075925 | 13-cis-Retinal (Vitamin A aldehyde)                            |
| 12 | 7852714  | p-Quinone dioxime (p-Benzoquinone dioxime)                     |
| 12 | 11076083 | 3,4-Diaminotoluene                                             |
| 12 | 7852846  | Titanocene dichloride                                          |
| 12 | 11076533 | o-Aminophenol                                                  |
| 12 | 11076275 | cis-Dichlorodiamine platinum                                   |
| 12 | 7853476  | Pentabromophenol                                               |
| 12 | 11076559 | o-Phenylenediamine                                             |
| 12 | 11075917 | 1,4,5-Trihydroxynaphthalene                                    |
| 12 | 11076518 | Ninhydrin                                                      |
| 12 | 11076076 | 3,3'-Dihydroxybenzidine                                        |
| 12 | 11076358 | Ergotamine tartrate                                            |
| 12 | 7852598  | Pentachlorophenol                                              |
| 12 | 11075883 | 1,1,1,2-Tetrabromoethane                                       |
| 12 | 7852523  | p-Nitrosodiphenylamine                                         |
| 12 | 11076494 | N,N-Dimethyl-p-nitrosoaniline                                  |
| 12 | 11076122 | 4-Amino-4'-hydroxy-3-methyldiphenylamine                       |
| 12 | 11076328 | Digitonin                                                      |
| 12 | 7852956  | Ziram                                                          |
| 12 | 11076527 | N-Methyl-p-aminophenol sulfate                                 |
| 12 | 7852824  | Tetramethylthiuram disulfide                                   |
| 12 | 11076065 | 2-Octyl-3-isothiazolone                                        |
| 12 | 11076251 | Captan 90-concentrate (solid)                                  |
| 12 | 11076132 | 4-Hydroxyphenyl retinamide                                     |
| 12 | 7852793  | Tamoxifen, citrate salt                                        |
| 13 | 7854866  | Corticosterone                                                 |
| 13 | 7851832  | Cobalt sulfate heptahydrate                                    |
| 13 | 11076451 | Methoxychlor [95%]                                             |
| 13 | 7852623  | N-Phenyl-2-naphthylamine                                       |
| 13 | 7854582  | trans-Retinol acid (Vitamin A)                                 |
| 13 | 7854794  | Progesterone                                                   |
| 13 | 7852276  | Lovastatin                                                     |
| 14 | 11076592 | Phenmedipham (3-Methoxycarbonylamino-phenyl-N-3'-methylphenyl) |
| 14 | 11076270 | Cimicifugoside                                                 |
| 14 | 11076311 | Diazoaminobenzene                                              |
| 14 | 7852339  | 2-Methyl-1-nitroanthraquinone                                  |
| 14 | 11076073 | 3,3',5,5'-Tetrabromo bisphenol A                               |
| 14 | 7851561  | o-Aminoazotoluene                                              |
| 14 | 7852319  | Methoxychlor                                                   |
| 14 | 11076444 | Medroxyprogesterone acetate                                    |
| 14 | 11076586 | Pentamidine isethionate                                        |
| 14 | 11076175 | Actein                                                         |
| 15 | 7852357  | 4,4'-Methylene-bis-2-chloroaniline (MOCA)                      |
| 15 | 7852736  | Rifampicin                                                     |
| 15 | 11076317 | Dichlorvos (Vapona)                                            |
| 15 | 7852617  | Phenolphthalein                                                |
| 15 | 11076488 | n-(1,3-Dimethylbutyl)-n`-phenyl-p-phenylenediamine             |

|    |          |                                                             |
|----|----------|-------------------------------------------------------------|
| 15 | 11076521 | N-Isopropyl-N'-phenyl-p-phenylenediamine                    |
| 15 | 11076261 | Chlordane, technical grade                                  |
| 15 | 7852619  | Phenoxybenzamine HCl                                        |
| 15 | 11076163 | 9-Aminoacridine HCl H2O                                     |
| 16 | 11075895 | 1,2-Cyclohexanedicarboxylic acid, bis(oxiranylmethyl) ester |
| 16 | 11075957 | 2,3,5,6-Tetrachlorophenol                                   |
| 16 | 11076280 | Colchicine                                                  |
| 16 | 11076279 | Colchicine                                                  |
| 16 | 7851755  | Chlorambucil                                                |
| 16 | 7851523  | Actinomycin D                                               |
| 16 | 11076697 | Tris(2,3-epoxypropyl)isocyanurate                           |
| 16 | 7851865  | Rhothane (TDE)                                              |
| 16 | 7852296  | Melphalan                                                   |
| 16 | 11076329 | Diglycidyl resorcinol ether                                 |
| 16 | 11076432 | Malachite Green Oxalate                                     |
| 16 | 11076302 | Daunomycin HCL                                              |
| 17 | 11076490 | N,N,N',N'-Tetramethyl-p-phenylenediamine                    |
| 17 | 7852732  | all-trans-Retinyil acetate                                  |
| 17 | 11075988 | 2,4-Hexadienal                                              |
| 17 | 11076463 | Methyl testosterone                                         |
| 17 | 11076615 | Progesterone                                                |
| 17 | 7854810  | Apigenin                                                    |
| 17 | 7851925  | 3,3'-Dichlorobenzidine 2HCl                                 |
| 17 | 11076162 | 8-Hydroxyquinoline                                          |
| 17 | 7852222  | 8-Hydroxyquinoline                                          |
| 17 | 7852952  | Zearalenone                                                 |
| 17 | 11076381 | Fumaronitrile                                               |
| 17 | 11075923 | 1,6-Hexanediol diacrylate                                   |
| 17 | 11076391 | Guggulsterones E                                            |
| 17 | 11076712 | Zearalenone                                                 |
| 17 | 11076565 | Oxymetholone                                                |
| 17 | 7851785  | Chloroacetophenone                                          |
| 17 | 7851786  | 4'-(Chloroacetyl)acetanilide                                |
| 18 | 7852812  | Tetrachlorvinphos (Gardona)                                 |
| 18 | 7852338  | N-Methyl-N'-nitro-N-nitrosoguanidine                        |
| 18 | 11076326 | Diethylene glycol diacrylate                                |
| 18 | 7851768  | 3-Chloro-4-(dichloromethyl)-5-hydroxy-2(5H)-furanone, (MX)  |
| 18 | 11076675 | Tetraethylene glycol diacrylate                             |
| 18 | 7851606  | Auramine                                                    |
| 18 | 11076465 | Methylene bis(thiocyanate)                                  |
| 18 | 11076676 | Tetraethylene glycol diacrylate                             |
| 18 | 11076523 | Nitrogen mustard HCl                                        |
| 18 | 11076710 | Vitamin D3                                                  |
| 18 | 11075944 | 2,2',4'-Trichloroacetophenone                               |
| 18 | 7851735  | Captan                                                      |
| 18 | 11076176 | Adriamycin, hydrochloride                                   |
| 18 | 11076585 | Pentaerythritol Triacrylate                                 |
| 18 | 11076634 | Saquinavir Mesylate                                         |

|    |          |                                            |
|----|----------|--------------------------------------------|
| 18 | 7852860  | Toxaphene                                  |
| 18 | 11075909 | 1,3-Diiminobenz (f)-isoindoline            |
| 18 | 11076688 | trans-Retinal (Vitamin A aldehyde)         |
| 19 | 7852002  | 7,12-Dimethylbenz(a)anthracene             |
| 19 | 11076170 | Acetochlor                                 |
| 19 | 7854036  | Digoxin                                    |
| 19 | 11076495 | N,N-Dimethyl-p-phenylenediamine            |
| 19 | 11076492 | N,N-Diethyl-p-phenylenediamine             |
| 19 | 11076156 | 6-Hydroxy-2-naphthyl disulfide (DDD)       |
| 19 | 7851608  | 5-Azacytidine                              |
| 19 | 11076288 | Curcumin                                   |
| 19 | 11076642 | Sodium Dichromate Dihydrate                |
| 19 | 11076643 | Sodium dichromate dihydrate (VI)           |
| 19 | 11076612 | Potassium dichromate                       |
| 20 | 11076353 | Domiphen bromide                           |
| 20 | 7854806  | 4-Hydroxytamoxifen                         |
| 20 | 11076420 | Kepone                                     |
| 20 | 7852262  | Chlordecone (Kepone)                       |
| 20 | 7852833  | 4,4-Thiobis(6-t-butyl-m-cresol)            |
| 21 | 7851957  | Diethylstilbestrol [DES]                   |
| 21 | 7853657  | Alachlor                                   |
| 21 | 11076348 | Direct red 2 (C.I. 23500)                  |
| 21 | 11076392 | Guggulsterones Z                           |
| 21 | 7852170  | Hematoxylin (C.I. 75290)                   |
| 21 | 11076195 | Amitriptyline HCl                          |
| 21 | 11076293 | Cycloheximide                              |
| 21 | 11076545 | Oleic acid diethanolamine condensate (1:1) |
| 21 | 11076232 | Bis(cyclopentadienyl)vanadium chloride     |
| 21 | 7852303  | Mercuric chloride                          |
| 21 | 7852642  | Phenyl mercuric acetate                    |
| 21 | 11076713 | Zinc pyrithione                            |
| 21 | 11076573 | p-Aminophenol                              |
| 22 | 11076212 | Benzo(b)fluoranthene                       |
| 22 | 7851858  | Cyproterone acetate                        |
| 22 | 11076067 | 2-Pivalyl-1,3-indandione                   |
| 22 | 7852709  | Pyrimethamine                              |
| 22 | 7851611  | Azathioprine                               |
| 22 | 11076157 | 6-Mercaptopurine monohydrate               |
| 22 | 7854664  | 6-Thioguanine (6-TG)                       |
| 22 | 11076292 | Cycloheximide                              |
| 23 | 7853452  | 4,6-Dinitro-o-cresol                       |
| 23 | 11076081 | 3,4,5-Trichlorophenol                      |
| 23 | 7851685  | HC blue 2                                  |
| 23 | 11076557 | o-Phenanthroline                           |
| 23 | 7852716  | Acid red 114 (C.I. 23635)                  |
| 23 | 11076466 | Methylene blue trihydrate                  |
| 23 | 7852834  | 2,2'-Thiobis(4,6-dichlorophenol)           |
| 23 | 11076088 | 3,4-Dichlorophenyl isocyanate              |

|    |          |                                                    |
|----|----------|----------------------------------------------------|
| 23 | 11076262 | Chlorhexidine                                      |
| 23 | 7852739  | Basic red 9 (p-Rosaniline HCl) (C.I. 42500)        |
| 23 | 11076201 | a-Solanine                                         |
| 23 | 7853942  | Carminic acid                                      |
| 23 | 7853612  | 2,3,4,5-Tetrachlorophenol                          |
| 23 | 11075952 | 2,2'-Thiobis(4-chlorophenol)                       |
| 23 | 11075924 | 1,8-Dihydroxy-4,5-dinitroanthraquinone             |
| 23 | 11076497 | N,N'-Di-sec-butyl-p-phenylenediamine               |
| 23 | 7853270  | 2,2'-Methylenebis-(4-chlorophenol)                 |
| 23 | 11076355 | Econazole nitrate                                  |
| 23 | 7852145  | Hexamethyl-p-rostaniline chloride (Gentian violet) |



**Figure 1**

(a) Activity distributions of the set of 1408 compounds in the 13 caspase activation assays

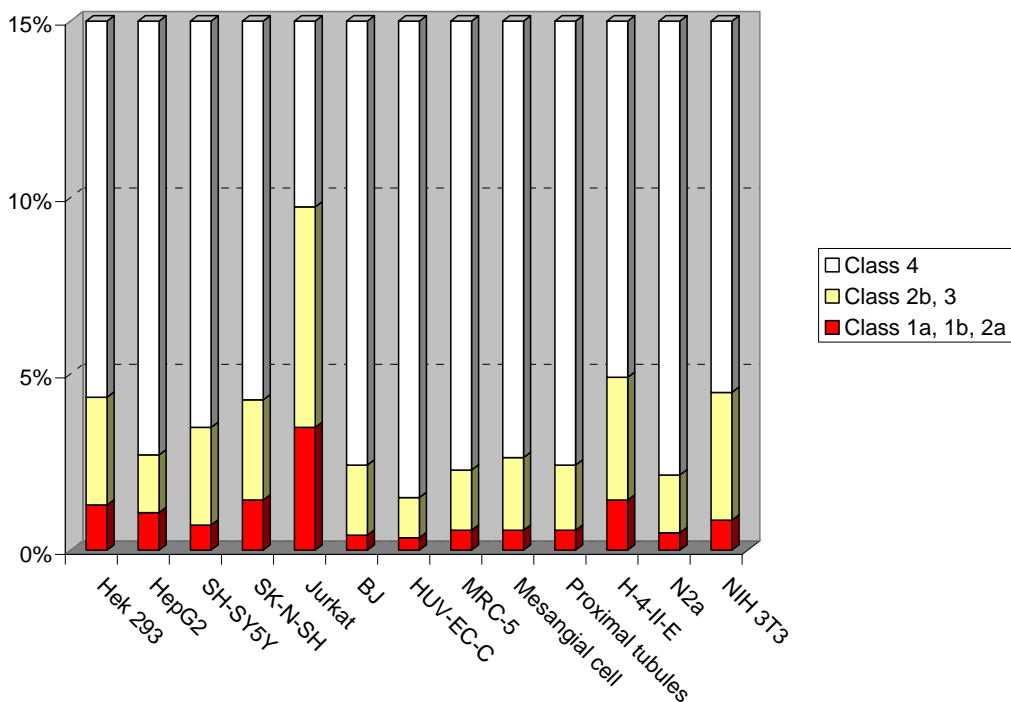

(b) Potency distributions of the set of 1408 compounds that were class 1-3 in the 13 caspase activation assays

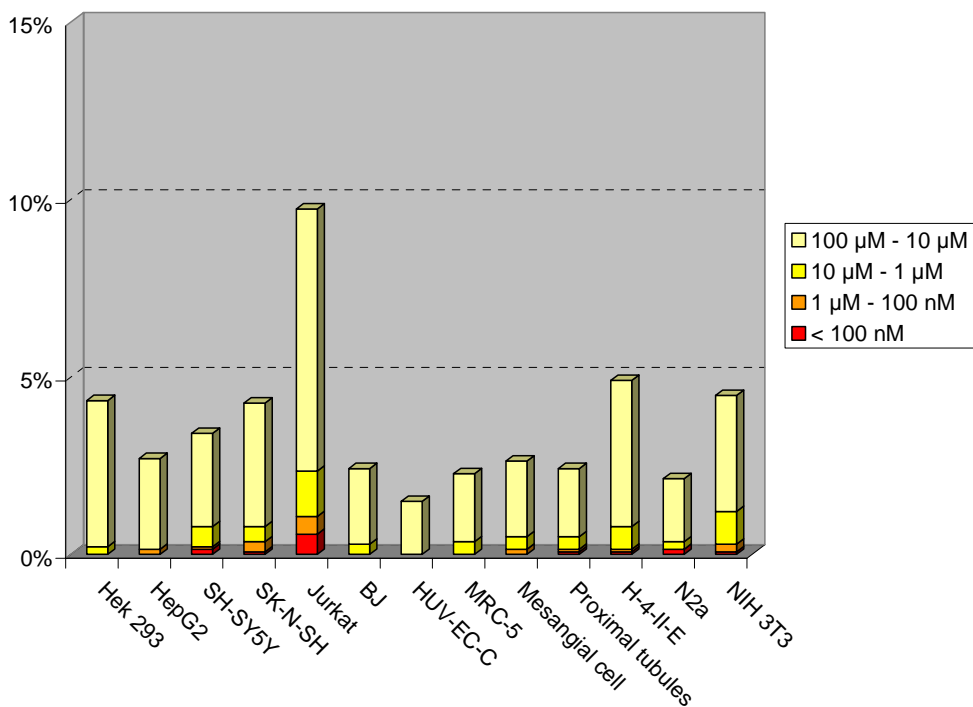

Supplement: NIHMS90595-supplement-supporting_inf.pdf [file NIHMS90595-supplement-supporting_inf.pdf]
